# Supplementary material for: Charge transfer complex enabled photoreduction of Wittig phosphonium salts
Source: Royal Society of Chemistry journal article supplement (doi:10.1039/d2qo01079h), 2022-01-01

## Supporting Information

# Charge Transfer Complex Enabled Photoreduction of Wittig Phosphonium Salts

Fang Tan<sup>a,c</sup>, Peng Zheng<sup>b,c</sup>, Qiang Liu<sup>c,\*</sup> and Xiang-Yu Chen<sup>c,\*</sup>

<sup>a</sup> School of Chemical Engineering, Guizhou Minzu University, Guiyang 550025, China

<sup>b</sup> Jinan Institute for Food and Drug Control, Jinan 250000, China.

<sup>c</sup> School of Chemical Sciences, University of Chinese Academy of Sciences, Beijing 100049,

## Contents

|                                                                                                        |    |
|--------------------------------------------------------------------------------------------------------|----|
| 1. General experimental details .....                                                                  | 3  |
| 2. General procedures .....                                                                            | 5  |
| 2.1. General procedure for the synthesis of (alkoxycarbonyl)methylated heteroarenes..                  | 5  |
| 2.2. One-pot synthesis of (alkoxycarbonyl)methylated 3-methylindole.....                               | 12 |
| 2.3. General procedure for the synthesis of (alkoxycarbonyl)methylated 1,1-<br>diphenylethylenes ..... | 12 |
| 2.4. General procedure for synthesis of (alkoxycarbonyl)methylated enamides .....                      | 14 |
| 2.5. General procedure for the synthesis of (alkoxycarbonyl)methylated oxindoles .....                 | 16 |
| 3. Mechanistic studies .....                                                                           | 18 |
| 3.1. UV/vis absorption spectrometry.....                                                               | 18 |
| 3.2 Control experiments.....                                                                           | 19 |
| 4. References .....                                                                                    | 20 |
| 5. NMR Spectra.....                                                                                    | 22 |

## 1. General experimental details

Chemicals were purchased from HEOWNS or Bidepharm and used without further purification unless otherwise noted. Solvents were purified using a solvent-purification system (VSPS-8, Vigor) that contained activated alumina and molecular sieves.

Analytical thin layer chromatography was carried out with silica gel pre-coated glass plates (TLC-Silica gel GF254, coating thickness: 0.25 mm) purchased from Xinnuo Chemical (Yantai, China). Chromatographic purification of the products was performed on silica gel 200-300 mesh. Visualization of the developed TLC plates was performed with ultraviolet irradiation (254 nm) or by staining with basic potassium permanganate solution.

High-resolution mass spectra (HRMS) were obtained with the mass analyzer of an orbitrap. The calculated values are based on the most abundant isotope.

IR spectra were taken on a Vertex 70 spectrophotometer and reported as wave numbers ( $\text{cm}^{-1}$ ).

The SGW X-4 was used to measure the melting point of solids.

The GC-MS TQ8040 was used in the detection of the reaction mixture.

UV-vis absorption spectra were acquired on Mettler Toledo UV-5 spectrophotometer.

$^1\text{H}$ - and  $^{13}\text{C}$ - NMR spectra were recorded at ambient temperature on a Shimadzu Avance 400/500 Spectrometer. The chemical shifts are reported in ppm downfield of tetramethylsilane (TMS) and referenced to residual solvent peaks resonance as the internal standard. The order of citation in parentheses is a) multiplicity (s = singlet, d = doublet, t = triplet, q = quartet, dd = doublet of doublet, ddd = doublet of doublet of doublet, td = triplet of doublet, m = multiplet), b) coupling constants, c) number of protons. Coupling constants (J) are reported in Hertz (Hz).

All photochemical experiments were performed magnetically stirred in 10 mL glass tubes under a nitrogen atmosphere. Photochemical experiments were performed magnetically

stirred in 10 mL glass tubes, sealed with a rubber septum. The tubes were irradiated with blue light (460 nm) using a LED lamp with a power output of 100 W. The distance from the light source to the irradiation vessel is 2 cm to keep the reaction temperature at  $45 \pm 5$  °C.

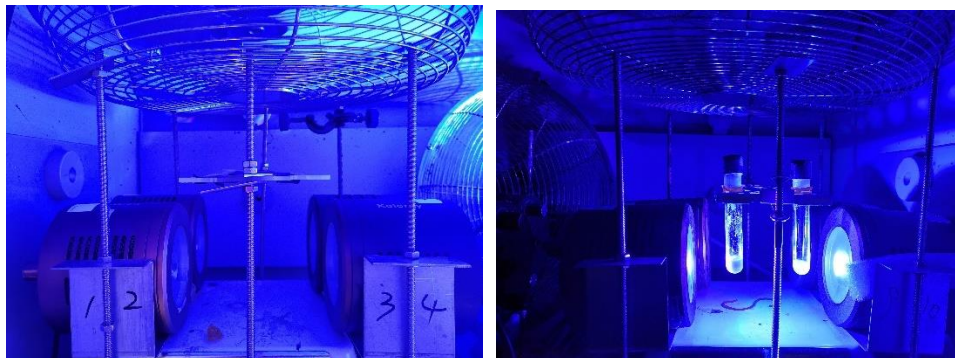

**Figure S1.** Blue LEDs employed in the reactions

## 2. General procedures

### 2.1. General procedure for the synthesis of (alkoxycarbonyl)methylated heteroarenes

Table S1. Optimization of the reaction conditions

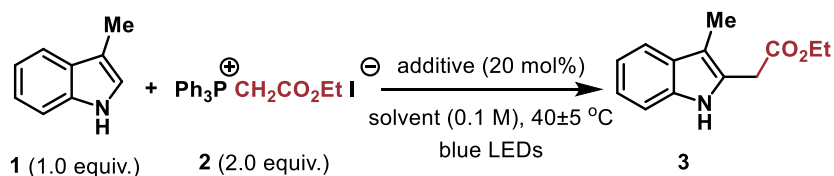

| Entry           | Solvent            | Additive                       | Yield (%) <sup>a</sup> |
|-----------------|--------------------|--------------------------------|------------------------|
| 1               | DMF                | /                              | 71                     |
| 2               | DMA                | /                              | 81                     |
| 3               | CH <sub>3</sub> CN | /                              | NR                     |
| 4               | DMSO               | /                              | trace                  |
| 5               | DCE                | /                              | NR                     |
| 6               | THF                | /                              | 39                     |
| 7               | DCM                | /                              | trace                  |
| 8               | toluene            | /                              | NR                     |
| 9               | Xylenes            | /                              | NR                     |
| 10 <sup>b</sup> | DMA                | /                              | NR                     |
| 11              | DMA                | TMEDA                          | 76                     |
| 12 <sup>c</sup> | DMA                | TMEDA                          | 42                     |
| 13              | DMA                | DBU                            | 56                     |
| 14              | DMA                | K <sub>2</sub> CO <sub>3</sub> | 78                     |

<sup>a</sup>Yield of isolated products after chromatography. <sup>b</sup>no irradiated with blue light. <sup>c</sup>100 mol% of TMEDA was used.

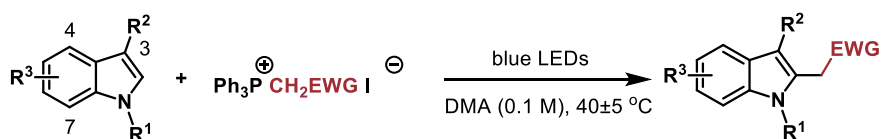

General procedures I: In a nitrogen-filled glove box, a 10-mL vial equipped with a magnetic stirring bar was charged sequentially with heteroarene (0.15 mmol) and triphenylphosphonium salt (0.3 mmol, 2.0 equiv.) and DMA (1.5 mL). The vial was closed and removed from the glove box. The resulting mixture was allowed to stir at  $40 \pm 5$  °C under blue LED (100 W) irradiation for 24 hours. Upon completion, solvent was removed under vacuum and the residue was subjected to silica gel chromatography using petroleum ether and ethyl acetate as eluent to afford the desired product.

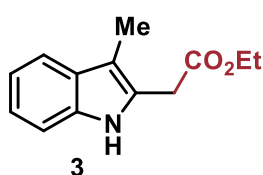

**Ethyl 2-(3-methyl-1H-indol-2-yl)acetate (3):** Prepared according to the general procedure I, the chromatographic purification using PE and EA (10 : 1) as the eluent afforded **3** as a light yellow oil (0.122 mmol, 25.6 mg, 81% yield). **<sup>1</sup>H NMR (400 MHz, CDCl<sub>3</sub>)**  $\delta$  8.50 (s, 1H), 7.52 (d,  $J = 7.7$  Hz, 1H), 7.33 – 7.28 (m, 1H), 7.20 – 7.06 (m, 2H), 4.20 (q,  $J = 7.1$  Hz, 2H), 3.77 (s, 2H), 2.27 (s, 3H), 1.30 (t,  $J = 7.1$  Hz, 3H). **<sup>13</sup>C NMR (101 MHz, CDCl<sub>3</sub>)**  $\delta$  170.9, 135.7, 126.5, 121.8, 119.2, 118.5, 118.5, 110.7, 109.0, 61.4, 32.0, 14.3, 8.5. **HRMS (ESI):**  $m/z$  [M-H]<sup>-</sup> calcd for C<sub>13</sub>H<sub>14</sub>O<sub>2</sub>N: 210.1030; found 210.1028. Analytical data for compound **3** was consistent with the literature.<sup>1</sup>

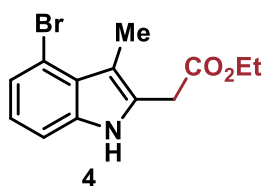

**Ethyl 2-(4-bromo-3-methyl-1H-indol-2-yl)acetate (4):** Prepared according to the general procedure I, the chromatographic purification using PE and EA (10 : 1) as the eluent afforded **4** as a yellow solid (0.083 mmol, 24.3 mg, 55% yield). **Melting Point:** 83-85 °C. **<sup>1</sup>H NMR (400 MHz, CDCl<sub>3</sub>)**  $\delta$  8.69 (s, 1H), 7.24 – 7.19 (m, 2H), 6.95 – 6.91 (m, 1H), 4.20 (q,  $J = 7.1$  Hz, 2H), 3.75 (s, 2H), 2.49 (s, 3H), 1.29 (t,  $J = 7.1$  Hz, 3H). **<sup>13</sup>C NMR (101 MHz, CDCl<sub>3</sub>)**  $\delta$  170.7, 136.9, 127.9, 126.6, 123.8, 122.5, 114.3, 110.1, 109.9, 61.6, 31.6, 14.2, 10.9. **IR (ATR):** 3338, 2918, 1712, 1609, 1451, 1374, 1312, 1175, 1077, 1014, 922 cm<sup>-1</sup>. **HRMS (ESI):**  $m/z$  [M-H]<sup>-</sup> calcd for C<sub>13</sub>H<sub>13</sub>O<sub>2</sub>NBr: 294.0135; found 294.0140.

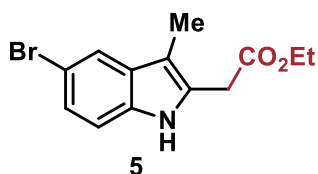

**Ethyl 2-(5-bromo-3-methyl-1H-indol-2-yl)acetate (5):**

Prepared according to the general procedure I, the chromatographic purification using PE and EA (10 : 1) as the eluent afforded **5** as a yellow solid (0.090 mmol, 26.6 mg, 60% yield). **Melting Point:** 73-75 °C. **<sup>1</sup>H NMR (400 MHz, CDCl<sub>3</sub>)** δ 8.61 (s, 1H), 7.61 (d, *J* = 1.9 Hz, 1H), 7.21 (dd, *J* = 8.6, 1.9 Hz, 1H), 7.15 (dd, *J* = 8.5, 0.5 Hz, 1H), 4.20 (q, *J* = 7.1 Hz, 2H), 3.75 (s, 2H), 2.20 (s, 3H), 1.29 (t, *J* = 7.1 Hz, 3H). **<sup>13</sup>C NMR (101 MHz, CDCl<sub>3</sub>)** δ 170.7, 134.3, 130.6, 127.9, 124.5, 121.2, 112.5, 112.2, 108.6, 61.6, 31.7, 14.3, 8.4. **IR (ATR):** 1976, 1706, 1609, 1459, 1378, 1285, 1166, 1056, 894 cm<sup>-1</sup>. **HRMS (ESI):** *m/z* [M-H]<sup>-</sup> calcd for C<sub>13</sub>H<sub>13</sub>O<sub>2</sub>NBr: 294.0135; found 294.0139.

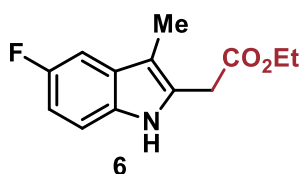

**Ethyl 2-(5-fluoro-3-methyl-1H-indol-2-yl)acetate (6)**

Prepared according to the general procedure I, the chromatographic purification using PE and EA (10 : 1) as the eluent afforded **6** as a yellow wax (0.089 mmol, 20.8 mg, 59% yield). **<sup>1</sup>H NMR (400 MHz, CDCl<sub>3</sub>)** δ 8.54 (s, 1H), 7.20 (dd, *J* = 8.8, 4.4 Hz, 1H), 7.12 (dd, *J* = 9.4, 2.3 Hz, 1H), 6.90 – 6.85 (m, 1H), 4.20 (q, *J* = 7.1 Hz, 2H), 3.76 (s, 2H), 2.20 (s, 3H), 1.29 (t, *J* = 7.1 Hz, 3H). **<sup>13</sup>C NMR (101 MHz, CDCl<sub>3</sub>)** δ 170.7, 157.8 (d, *J* = 235.3 Hz), 129.3 (d, *J* = 9.6 Hz), 111.3, 111.2, 109.9 (d, *J* = 26.3 Hz), 109.2 (d, *J* = 4.7 Hz), 103.6, 103.3, 61.5, 31.9, 14.2, 8.5. **IR (ATR):** 3378, 2920, 1720, 1661, 1919, 1480, 1283, 1162, 1022, 936, 796 cm<sup>-1</sup>. **HRMS (ESI):** *m/z* [M-H]<sup>-</sup> calcd for C<sub>13</sub>H<sub>13</sub>O<sub>2</sub>F: 234.0936; found 234.0935.

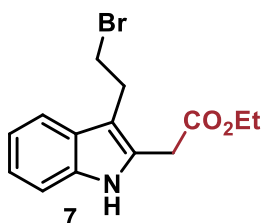

**Ethyl 2-(3-(2-bromoethyl)-1H-indol-2-yl)acetate (7)**

Prepared according to the general procedure I, the chromatographic purification using PE and EA (10 : 1) as the eluent afforded **7** as a light yellow oil (0.068 mmol, 21.0 mg, 45% yield). **<sup>1</sup>H NMR (500 MHz, CDCl<sub>3</sub>)** δ 8.68 (s, 1H), 7.52 (d, *J* = 8.7 Hz, 1H), 7.34 (d, *J* = 7.6 Hz, 1H), 7.20 – 7.15 (m, 1H), 7.12 – 7.10 (m, 1H), 3.81 (d, *J* = 6.9 Hz, 2H), 4.21 (q, *J* = 7.1 Hz, 2H), 3.71 (t, *J* = 7.5 Hz, 1H), 3.38 – 3.30 (m, 2H), 3.22 – 3.16 (m, 1H), 1.29 (t, *J* = 7.1 Hz, 3H). **<sup>13</sup>C NMR (101 MHz, CDCl<sub>3</sub>)** δ 170.5,

135.7, 128.0, 127.6, 122.2, 119.8, 118.1, 111.1, 110.8, 61.6, 32.9, 32.0, 28.4, 14.3. **IR (ATR):** 3391, 2974, 1720, 1600, 1451, 1372, 1304, 1163, 1023, 932, 739  $\text{cm}^{-1}$ . **HRMS (ESI):**  $m/z$   $[\text{M}-\text{H}]^-$  calcd for  $\text{C}_{14}\text{H}_{17}\text{BrNO}_2$ : 310.0437; found 310.0432.

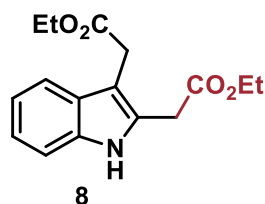

**Diethyl 2,2'-(1H-indole-2,3-diyl)diacetate (8):** Prepared according to the general procedure I, the chromatographic purification using PE and EA (10 : 1) as the eluent afforded **8** as a colorless oil (0.123 mmol, 35.5 mg, 82% yield).  **$^1\text{H}$  NMR (400 MHz,  $\text{CDCl}_3$ )**  $\delta$  8.78 (s, 1H), 7.57 (d,  $J = 8.4$  Hz, 1H), 7.31 (d,  $J = 7.9$  Hz, 1H), 7.18 – 7.09 (m, 2H), 4.20 (q,  $J = 7.1$  Hz, 2H), 4.11 (q,  $J = 7.1$  Hz, 2H), 3.85 (s, 2H), 3.70 (s, 2H), 1.29 (t,  $J = 7.1$  Hz, 3H), 1.22 (t,  $J = 7.1$  Hz, 3H).  **$^{13}\text{C}$  NMR (101 MHz,  $\text{CDCl}_3$ )**  $\delta$  171.1, 170.7, 135.5, 128.4, 128.0, 122.1, 119.8, 118.6, 111.0, 106.2, 61.5, 60.9, 31.9, 30.4, 14.3, 14.3. **IR (ATR):** 3340, 2980, 1716, 1453, 1373, 1306, 1158, 1024, 950, 735  $\text{cm}^{-1}$  **HRMS (ESI):**  $m/z$   $[\text{M}-\text{H}]^-$  calcd for  $\text{C}_{16}\text{H}_{18}\text{O}_4\text{N}$ : 288.1241; found 288.1245.

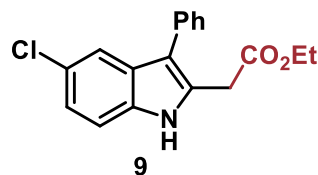

**Ethyl 2-(5-chloro-3-phenyl-1H-indol-2-yl)acetate (9):** Prepared according to the general procedure I, the chromatographic purification using PE and EA (10 : 1) as the eluent afforded **9** as a light yellow oil (0.075 mmol, 23.5 mg, 50% yield).  **$^1\text{H}$  NMR (400 MHz,  $\text{CDCl}_3$ )**  $\delta$  8.98 (s, 1H), 7.59 (d,  $J = 2.0$  Hz, 1H), 7.49 – 7.43 (m, 4H), 7.36 – 7.32 (m, 1H), 7.29 (d,  $J = 8.6$  Hz, 1H), 7.15 (dd,  $J = 8.6, 2.0$  Hz, 1H), 4.22 (q,  $J = 7.2$  Hz, 2H), 3.88 (s, 2H), 1.29 (t,  $J = 7.2$  Hz, 3H).  **$^{13}\text{C}$  NMR (126 MHz,  $\text{CDCl}_3$ )**  $\delta$  170.9, 134.1, 134.0, 129.9, 129.7, 128.9, 128.5, 126.8, 126.0, 122.7, 118.8, 116.1, 112.1, 61.7, 32.1, 14.3. **IR (ATR):** 3346, 2981, 1721, 1603, 1446, 1370, 1290, 1200, 1062, 1024, 799  $\text{cm}^{-1}$  **HRMS (ESI):**  $m/z$   $[\text{M}+\text{Na}]^+$  calcd for  $\text{C}_{18}\text{H}_{16}\text{ClNO}_2\text{Na}^+$ : 336.0762.; found 336.0747.



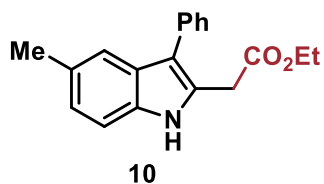

**Ethyl 2-(5-methyl-3-phenyl-1H-indol-2-yl)acetate (10):**

Prepared according to the general procedure I, the chromatographic purification using PE and EA (10 : 1) as the eluent afforded **10** as a colorless oil (0.102 mmol, 29.9 mg, 68% yield). <sup>1</sup>H NMR (400 MHz, CDCl<sub>3</sub>) δ 8.79 (s, 1H), 7.51 – 7.44 (m, 5H), 7.36 – 7.27 (m, 2H), 7.08 – 7.00 (m, 1H), 4.22 (q, *J* = 7.1 Hz, 2H), 3.88 (s, 2H), 2.43 (s, 3H), 1.29 (t, *J* = 7.1 Hz, 3H). <sup>13</sup>C NMR (101 MHz, CDCl<sub>3</sub>) δ 171.0, 134.8, 134.1, 129.8, 129.5, 128.7, 127.6, 127.1, 126.3, 123.9, 118.9, 115.9, 110.7, 61.5, 32.3, 21.6, 14.3. IR (ATR): 3373, 2918, 1720, 1602, 1448, 1374, 1300, 1187, 1022, 796 cm<sup>-1</sup>. HRMS (ESI): *m/z* [M-H]<sup>-</sup> calcd for C<sub>19</sub>H<sub>18</sub>O<sub>2</sub>N: 292.1343; found 292.1349.

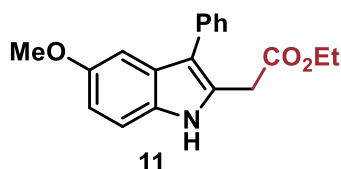

**Ethyl 2-(5-methoxy-3-phenyl-1H-indol-2-yl)acetate (11):**

Prepared according to the general procedure I, the chromatographic purification using PE and EA (10 : 1) as the eluent afforded **11** as a yellow oil (0.084 mmol, 26.0 mg, 56% yield). <sup>1</sup>H NMR (500 MHz, CDCl<sub>3</sub>) δ 8.80 (s, 1H), 7.49 – 7.46 (m, 4H), 7.36 – 7.30 (m, 1H), 7.27 – 7.23 (m, 1H), 7.10 (s, 1H), 6.86 (d, *J* = 8.8 Hz, 1H), 4.20 (q, *J* = 7.0 Hz, 2H), 3.86 (s, 2H), 3.80 (s, 3H), 1.28 (t, *J* = 6.9 Hz, 3H). <sup>13</sup>C NMR (126 MHz, CDCl<sub>3</sub>) δ 171.0, 154.7, 134.8, 130.9, 129.7, 128.8, 127.8, 126.4, 116.2, 112.5, 111.8, 101.2, 61.6, 56.1, 32.4, 14.3. IR (ATR): 2979, 1721, 1594, 1447, 1402, 1205, 1145, 1068, 799 cm<sup>-1</sup>. HRMS (ESI): *m/z* [M-H]<sup>-</sup> calcd for C<sub>19</sub>H<sub>18</sub>O<sub>3</sub>N: 308.1292; found 308.1296.

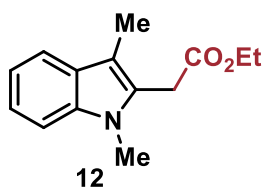

**Ethyl 2-(1,3-dimethyl-1H-indol-2-yl)acetate (12):**

Prepared according to the general procedure I, the chromatographic purification using EA and PE (10 : 1) as the eluent afforded **12** as a colorless oil (0.128 mmol, 29.5 mg, 85% yield). <sup>1</sup>H NMR (400 MHz, CDCl<sub>3</sub>) δ 7.56 – 7.54 (m, 1H), 7.29 – 7.27 (m, 1H), 7.24 – 7.19 (m, 1H), 7.13 – 7.09 (m, 1H), 4.16 (q, *J* = 7.1 Hz, 2H), 3.80 (s, 2H), 3.72 (s, 3H), 2.32 (s, 3H), 1.26 (t, *J* = 7.1 Hz, 3H). <sup>13</sup>C NMR (101 MHz, CDCl<sub>3</sub>) δ 170.2, 137.0, 128.9, 128.1, 121.5, 118.9, 118.7, 109.1, 109.0, 61.3, 31.2, 30.0,

14.3, 9.0. **HRMS (ESI):**  $m/z$   $[M+H]^+$  calcd for  $C_{14}H_{18}O_2N^+$ : 232.1332; found 232.1335. Analytical data for compound **12** was consistent with the literature.<sup>2</sup>

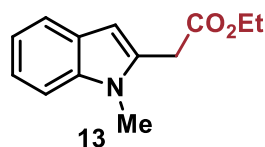

**Ethyl 2-(1-methyl-1H-indol-2-yl)acetate (13):** Prepared according to the general procedure I, the chromatographic purification using EA and PE (10 : 1) as the eluent afforded **13** as a brown wax (0.077 mmol, 16.6 mg, 51% yield). **<sup>1</sup>H NMR (400 MHz, CDCl<sub>3</sub>)**  $\delta$  7.58 (d,  $J$  = 7.8 Hz, 1H), 7.30 (d,  $J$  = 8.2 Hz, 1H), 7.24 – 7.19 (m, 1H), 7.13 – 7.08 (m, 1H), 6.43 (s, 1H), 4.19 (q,  $J$  = 7.1 Hz, 2H), 3.83 (s, 2H), 3.71 (s, 3H), 1.29 (t,  $J$  = 7.1 Hz, 3H). **<sup>13</sup>C NMR (101 MHz, CDCl<sub>3</sub>)**  $\delta$  170.0, 137.8, 132.7, 127.7, 121.4, 120.4, 119.6, 109.2, 101.9, 61.4, 33.5, 30.0, 14.3. **HRMS (ESI):**  $m/z$   $[M+H]^+$  calcd for  $C_{13}H_{15}O_2N^+$ : 218.1176; found 218.1178. Analytical data for compound **13** was consistent with the literature.<sup>2</sup>

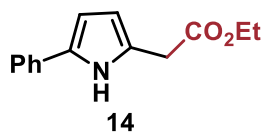

**Ethyl 2-(5-phenyl-1H-pyrrol-2-yl)acetate (14):** Prepared according to the general procedure I, the chromatographic purification using PE and EA (48 : 1) as the eluent afforded **14** as a brown wax (0.078 mmol, 17.9 mg, 52% yield). **<sup>1</sup>H NMR (400 MHz, CDCl<sub>3</sub>)**  $\delta$  9.00 (s, 1H), 7.48 – 7.43 (m, 2H), 7.37 – 7.31 (m, 2H), 7.22 – 7.15 (m, 1H), 6.43 – 6.39 (m, 1H), 6.08 – 6.03 (m, 1H), 4.20 (q,  $J$  = 7.1 Hz, 2H), 3.70 (s, 2H), 1.29 (t,  $J$  = 7.1 Hz, 3H). **<sup>13</sup>C NMR (101 MHz, CDCl<sub>3</sub>)**  $\delta$  171.2, 132.8, 132.2, 128.9, 126.1, 124.6, 123.7, 109.2, 105.9, 61.3, 33.4, 14.3. **IR (ATR):** 3344, 2918, 1714, 1598, 1506, 1459, 1369, 1221, 1160, 1028, 752  $cm^{-1}$ . **HRMS (ESI):**  $m/z$   $[M-H]^-$  calcd for  $C_{14}H_{14}O_2N^-$ : 228.1030; found 228.1030.

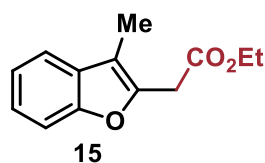

**Ethyl 2-(3-methylbenzofuran-2-yl)acetate (15):** Prepared according to the general procedure I, the chromatographic purification using PE and EA (10 : 1) as the eluent afforded **15** as a colorless oil (0.105 mmol, 22.9 mg, 70% yield). **<sup>1</sup>H NMR (400 MHz, CDCl<sub>3</sub>)**  $\delta$  7.47 – 7.38 (m, 2H), 7.21 – 7.19 (m, 2H), 4.19 (q,  $J$  = 7.1 Hz, 2H), 3.77 (s, 2H), 2.21 (s, 3H), 1.26 (t,  $J$  = 7.1 Hz, 3H). **<sup>13</sup>C NMR (101 MHz, CDCl<sub>3</sub>)**  $\delta$  169.2, 154.2, 146.2, 130.0, 124.0, 122.3, 119.2, 112.9, 111.0,

61.4, 32.9, 14.3, 8.1. **IR (ATR):** 2922, 1730, 1605, 1512, 1462, 1368, 1242, 1161, 1025, 930, 741  $\text{cm}^{-1}$ . **HRMS (ESI):**  $m/z$   $[\text{M}-\text{H}]^-$  calcd for  $\text{C}_{13}\text{H}_{13}\text{O}_3$ : 217.0870; found 217.0865.

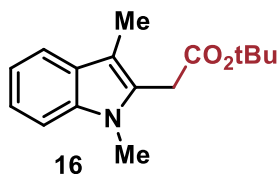

**Tert-butyl 2-(1,3-dimethyl-1H-indol-2-yl)acetate (16):**

Prepared according to the general procedure I, the chromatographic purification using PE and EA (10 : 1) as the eluent afforded **16** as a colorless oil (0.096 mmol, 24.9 mg, 64% yield).  **$^1\text{H}$  NMR (400 MHz,  $\text{CDCl}_3$ )**  $\delta$  7.55 (d,  $J = 7.8$  Hz, 1H), 7.31 – 7.18 (m, 2H), 7.14 – 7.08 (m, 1H), 3.73 – 3.71 (m, 5H), 2.33 (s, 3H), 1.45 (s, 9H).  **$^{13}\text{C}$  NMR (101 MHz,  $\text{CDCl}_3$ )**  $\delta$  169.4, 137.0, 129.5, 128.2, 121.3, 118.8, 118.6, 108.9, 108.8, 81.5, 32.5, 30.0, 28.1, 8.9. **IR (ATR):** 2973, 1783, 1465, 1366, 1321, 1251, 1203, 1143, 1070, 727  $\text{cm}^{-1}$ . **HRMS (ESI):**  $m/z$   $[\text{M}+\text{H}]^+$  calcd for  $\text{C}_{16}\text{H}_{22}\text{O}_2\text{N}^+$ : 260.1645; found 260.1649.

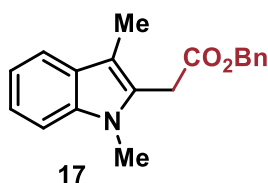

**Benzyl 2-(1,3-dimethyl-1H-indol-2-yl)acetate (17):** Prepared according to the general procedure I, the chromatographic purification using PE and EA (10 : 1) as the eluent afforded **17** as a colorless oil (0.119 mmol, 34.7 mg, 79% yield).  **$^1\text{H}$  NMR (400 MHz,  $\text{CDCl}_3$ )**  $\delta$  7.57 (d,  $J = 8.5$  Hz, 1H), 7.36 – 7.22 (m, 7H), 7.16 – 7.11 (m, 1H), 5.16 (s, 2H), 3.87 (s, 2H), 3.68 (s, 3H), 2.34 (s, 3H).  **$^{13}\text{C}$  NMR (101 MHz,  $\text{CDCl}_3$ )**  $\delta$  169.9, 137.0, 135.8, 128.7, 128.6, 128.4, 128.2, 128.1, 121.6, 118.9, 118.7, 109.2, 109.0, 67.0, 31.2, 30.0, 9.0. **IR (ATR),** 2977, 1732, 1463, 1375, 1235, 1152, 1066, 898  $\text{cm}^{-1}$ . **HRMS (ESI):**  $m/z$   $[\text{M}+\text{H}]^+$  calcd for  $\text{C}_{19}\text{H}_{20}\text{O}_2\text{N}^+$ : 294.1489; found 294.1492.

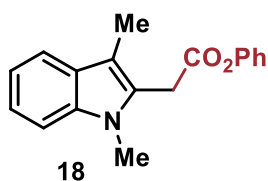

**Phenyl 2-(1,3-dimethyl-1H-indol-2-yl)acetate (18):** Prepared according to the general procedure I, the chromatographic purification using PE and EA (10 : 1) as the eluent afforded **18** as a colorless oil (0.117 mmol, 32.6 mg, 78% yield).  **$^1\text{H}$  NMR (400 MHz,  $\text{CDCl}_3$ )**  $\delta$  7.59 – 7.54 (m, 1H), 7.38 – 7.28 (m, 3H), 7.25 – 7.19 (m, 2H), 7.16 – 7.02 (m, 3H), 4.04 (s, 2H), 3.79 (s, 3H), 2.39 (s, 3H).  **$^{13}\text{C}$  NMR (101 MHz,  $\text{CDCl}_3$ )**  $\delta$  168.5, 150.7, 137.1, 129.5,

128.1, 128.1, 126.1, 121.8, 121.5, 119.0, 118.8, 109.6, 109.0, 31.3, 30.1, 9.0. **IR (ATR):** 2918, 1745, 1465, 1372, 1250, 1071, 1017  $\text{cm}^{-1}$ . **HRMS (ESI):**  $m/z$   $[M+H]^+$  calcd for  $\text{C}_{18}\text{H}_{18}\text{O}_2\text{N}^+$ : 280.1332; found 280.1335.

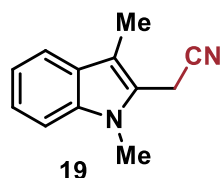

**2-(1,3-Dimethyl-1H-indol-2-yl)acetonitrile (19):** Prepared according to the general procedure I, the chromatographic purification using PE and EA (10 : 1) as the eluent afforded **19** as a colorless oil (0.092 mmol, 16.8 mg, 61% yield).  **$^1\text{H}$  NMR (400 MHz,  $\text{CDCl}_3$ )**  $\delta$  7.57 – 7.53 (m, 1H), 7.31 – 7.24 (m, 2H), 7.17 – 7.12 (m, 1H), 3.83 (s, 2H), 3.76 (s, 3H), 2.31 (s, 3H).  **$^{13}\text{C}$  NMR (101 MHz,  $\text{CDCl}_3$ )**  $\delta$  137.2, 127.8, 123.6, 122.6, 119.5, 119.1, 116.2, 109.8, 109.1, 30.0, 13.9, 8.9. **IR (ATR):** 2964, 1643, 1464, 1399, 1256, 1069, 796  $\text{cm}^{-1}$ . **HRMS (ESI):**  $m/z$   $[M+H]^+$  calcd for  $\text{C}_{12}\text{H}_{13}\text{N}_2^+$ : 185.1073; found 185.1077.

## 2.2. One-pot synthesis of (alkoxycarbonyl)methylated 3-methylindole

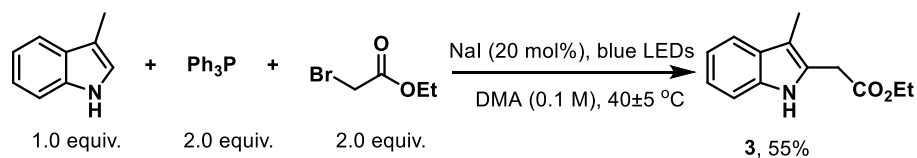

In a nitrogen-filled glove box, a 10-mL vial equipped with a magnetic stirring bar was charged sequentially with 3-methylindole (0.15 mmol), triphenylphosphine (0.3 mmol, 2.0 equiv.), ethyl bromoacetate (0.3 mmol, 2.0 equiv.), NaI (0.03 mmol, 0.2 equiv.), and DMA (1.5 mL). The vial was closed and removed from the glove box. The resulting mixture was allowed to stir at  $40 \pm 5$  °C under blue LED (100 W) irradiation for 24 hours. Upon completion, solvent was removed under vacuum and the residue was subjected to silica gel chromatography using petroleum ether and ethyl acetate PE and EA (10 : 1) as eluent to afford the desired product **3** (17.9 mg, 0.083 mmol, 55%).

## 2.3. General procedure for the synthesis of (alkoxycarbonyl)methylated 1,1-diphenylethylenes

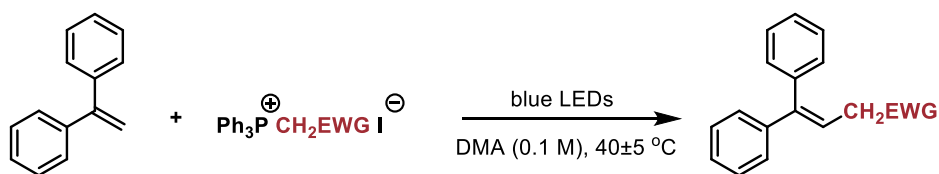

General procedures II: In a nitrogen-filled glove box, a 10-mL vial equipped with a magnetic stirring bar was charged sequentially with 1,1-diphenylethylene (0.15 mmol), triphenylphosphonium salt (0.3 mmol, 2.0 equiv.) and DMA (1.5 mL). The vial was closed and removed from the glove box. The resulting mixture was allowed to stir at  $40 \pm 5$  °C under blue LED (100 W) irradiation for overnight as monitored by TLC. Upon completion, solvent was removed under vacuum and the residue was subjected to silica gel chromatography using petroleum ether and ethyl acetate as eluent to afford the desired product.

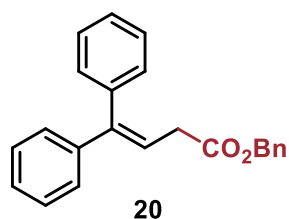

**Benzyl 4,4-diphenylbut-3-enoate (20):** Prepared according to the general procedure II, the chromatographic purification using PE and EA (50 : 1) as the eluent afforded **20** as a white solid. (0.098 mmol, 32.0 mg, 65% yield). **Melting Point:** 63-65 °C. **<sup>1</sup>H NMR (400 MHz, CDCl<sub>3</sub>)**  $\delta$  7.40 – 7.31 (m, 8H), 7.30 – 7.24 (m, 5H), 7.20 – 7.17 (m, 2H), 6.30 (t,  $J = 7.4$  Hz, 1H), 5.16 (s, 2H), 3.23 (d,  $J = 7.4$  Hz, 2H). **<sup>13</sup>C NMR (101 MHz, CDCl<sub>3</sub>)**  $\delta$  171.8, 145.0, 142.0, 139.3, 136.0, 129.9, 128.7, 128.5, 128.4, 128.4, 128.3, 127.6, 127.6, 120.3, 66.6, 35.6. **IR (ATR):** 3668, 2975, 2912, 1719, 1381, 1325, 1186, 1069, 808, 757 cm<sup>-1</sup> **HRMS (ESI):**  $m/z$  [M-H]<sup>-</sup> calcd for C<sub>23</sub>H<sub>19</sub>O<sub>2</sub><sup>-</sup>: 327.1391; found 327.1397.

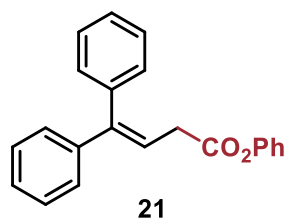

**Phenyl 4,4-diphenylbut-3-enoate (21):** Prepared according to the general procedure II, the chromatographic purification using PE and EA (50 : 1) as the eluent afforded **21** as a colorless oil (0.111 mmol, 34.9 mg, 74% yield). **<sup>1</sup>H NMR (400 MHz, CDCl<sub>3</sub>)**  $\delta$  7.45 – 7.34 (m, 5H), 7.31 – 7.27 (m, 5H), 7.27 – 7.21 (m, 3H), 7.12 – 7.07 (m, 2H), 6.36 (t,  $J = 7.4$  Hz, 1H),

3.42 (d,  $J = 7.4$  Hz, 2H).  $^{13}\text{C NMR}$  (101 MHz,  $\text{CDCl}_3$ )  $\delta$  170.5, 150.8, 145.5, 141.9, 139.3, 129.9, 129.5, 128.6, 128.3, 127.7, 127.7, 127.6, 126.0, 121.6, 119.7, 35.6. **IR (ATR):** 2969, 1729, 1643, 1592, 1449, 1381, 1314, 1261, 1167, 1078, 1019, 754  $\text{cm}^{-1}$ . **HRMS (ESI):**  $m/z$   $[\text{M}-\text{H}]^-$  calcd for  $\text{C}_{22}\text{H}_{17}\text{O}_2$ : 313.1234; found 213.1240.

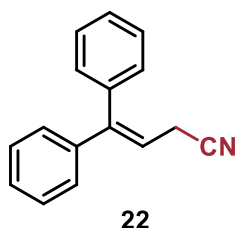

**4,4-Diphenylbut-3-enitrile (22):** Prepared according to the general procedure II, the chromatographic purification using PE and EA (50 : 1) as the eluent afforded **22** as a white solid (0.090 mmol, 19.7 mg, 60% yield). **Melting Point:** 94-96 °C.  $^1\text{H NMR}$  (400 MHz,  $\text{CDCl}_3$ )  $\delta$  7.46 – 7.35 (m, 3H), 7.30 – 7.16 (m, 7H), 6.03 (t,  $J = 7.4$  Hz, 1H), 3.14 (d,  $J =$

7.9 Hz, 2H).  $^{13}\text{C NMR}$  (101 MHz,  $\text{CDCl}_3$ )  $\delta$  147.7, 140.8, 138.1, 129.5, 128.9, 128.5, 128.3, 128.2, 127.5, 118.2, 115.6, 18.5. **HRMS (ESI):**  $m/z$   $[\text{M}-\text{H}]^-$  calcd for  $\text{C}_{16}\text{H}_{12}$ : 218.0975; found 218.0975.

Analytical data for compound **22** was consistent with the literature.<sup>3</sup>

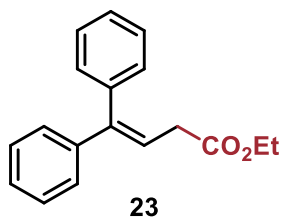

**Ethyl 4,4-diphenylbut-3-enoate (23):** Prepared according to the general procedure II, the chromatographic purification using PE and EA (50 : 1) as the eluent afforded **23** as a colorless oil (0.111 mmol, 29.5 mg, 74% yield).  $^1\text{H NMR}$  (400 MHz,  $\text{CDCl}_3$ )  $\delta$  7.42 – 7.32 (m,

3H), 7.28 – 7.24 (m, 5H), 7.21 – 7.16 (m, 2H), 6.26 (t,  $J = 7.4$  Hz, 1H), 4.15 (q,  $J = 7.1$  Hz, 2H), 3.15 (d,  $J = 7.4$  Hz, 2H), 1.26 (t,  $J = 7.1$  Hz, 3H).  $^{13}\text{C NMR}$  (101 MHz,  $\text{CDCl}_3$ )  $\delta$  171.9, 144.6, 142.0, 139.2, 129.8, 128.3, 128.1, 127.4, 127.4, 120.5, 60.7, 35.5, 14.2. Analytical data for compound **23** was consistent with the literature.<sup>3</sup>

#### 2.4. General procedure for synthesis of (alkoxycarbonyl)methylated enamides

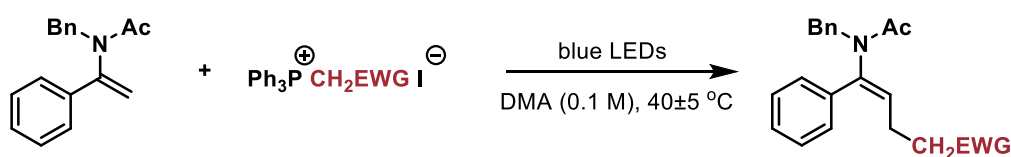

General procedures III: In a nitrogen-filled glove box, a 10-mL vial equipped with a magnetic stirring bar was charged sequentially with enamide (0.15 mmol), triphenylphosphonium salt (0.3 mmol, 2.0 equiv.) and DMA (1.5 mL). The vial was closed and removed from the glove box. The resulting mixture was allowed to stir at  $40 \pm 5$  °C under blue LED (100 W) irradiation for overnight as monitored by TLC. Upon completion, solvent was removed under vacuum and the residue was subjected to silica gel chromatography using petroleum ether and ethyl acetate as eluent to afford the desired product.

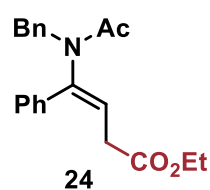

**Ethyl (E)-4-(N-benzylacetamido)-4-phenylbut-3-enoate (24):**

Prepared according to the general procedure III, the chromatographic purification using PE and EA (5 : 1) as the eluent afforded **24** as a light yellow oil. (0.070 mmol, 35.4 mg, 70% yield, *E/Z* = 5:1). **<sup>1</sup>H NMR (400 MHz, CDCl<sub>3</sub>)**  $\delta$  7.42 – 7.34 (m, 3H), 7.26 – 7.16 (m, 7H), 5.52 (t, *J* = 7.6 Hz, 1H), 4.47 (s, 2H), 4.06 (q, *J* = 7.1 Hz, 2H), 3.24 – 3.13 (m, 2H), 2.26 (s, 3H), 1.18 (t, *J* = 7.1 Hz, 3H). **<sup>13</sup>C NMR (101 MHz, CDCl<sub>3</sub>)**  $\delta$  171.0, 170.7, 141.5, 137.4, 134.3, 129.2, 129.0, 128.9, 128.8, 128.3, 127.3, 123.3, 61.0, 49.0, 34.2, 22.4, 14.2. **IR (ATR):** 2979, 1731, 1649, 1384, 1257, 1162, 1066, 864 cm<sup>-1</sup>. **HRMS (ESI):** *m/z* [M+H]<sup>+</sup> calcd for C<sub>21</sub>H<sub>24</sub>O<sub>3</sub>N<sup>+</sup>: 338.1751; found 338.1750.

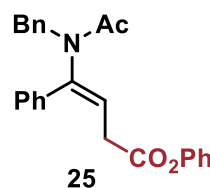

**Phenyl (E)-4-(N-benzylacetamido)-4-phenylbut-3-enoate (25):**

Prepared according to the general procedure III, the chromatographic purification using PE and EA (5 : 1) as the eluent afforded **25** as a light yellow oil (0.075 mmol, 28.9 mg, 50% yield, *E/Z* = 8:1). **<sup>1</sup>H NMR (400 MHz, CDCl<sub>3</sub>)**  $\delta$  7.47 – 7.41 (m, 3H), 7.39 – 7.18 (m, 10H), 7.00 – 6.93 (m, 2H), 5.62 (t, *J* = 7.6 Hz, 1H), 4.51 (s, 2H), 3.45 (d, *J* = 7.6 Hz, 2H), 2.30 (s, 3H). **<sup>13</sup>C NMR (101 MHz, CDCl<sub>3</sub>)**  $\delta$  171.0, 169.4, 150.5, 142.4, 137.4, 134.2, 129.6, 129.4, 129.0, 129.0, 128.9, 128.4, 127.4, 126.2, 122.4, 121.4, 49.1, 34.2, 22.5. **IR (ATR):** 2975, 1754, 1648, 1488, 1440, 1387, 1316, 1193, 1131, 1068, 978 cm<sup>-1</sup>. **HRMS (ESI):** *m/z* [M+H]<sup>+</sup> calcd for C<sub>25</sub>H<sub>24</sub>O<sub>3</sub>N<sup>+</sup>: 386.1751; found 386.1750.

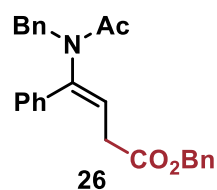

**Benzyl (E)-4-(N-benzylacetamido)-4-phenylbut-3-enoate (26):**

Prepared according to the general procedure III, the chromatographic purification using PE and EA (5 : 1) as the eluent afforded **26** as a light yellow oil (0.102 mmol, 40.7 mg, 68% yield, *E/Z* = 5:1). **<sup>1</sup>H NMR (400 MHz, CDCl<sub>3</sub>)** δ 7.40 – 7.31 (m, 6H), 7.29 – 7.15 (m, 9H), 5.54 (t, *J* = 7.6 Hz, 1H), 5.06 (s, 2H), 4.48 (s, 2H), 3.25 (d, *J* = 7.6 Hz, 2H), 2.21 (s, 3H). **<sup>13</sup>C NMR (101 MHz, CDCl<sub>3</sub>)** δ 171.0, 170.6, 141.8, 137.5, 135.5, 134.3, 129.3, 129.0, 128.9, 128.9, 128.7, 128.6, 128.5, 128.4, 123.0, 100.0, 66.9, 49.1, 34.2, 22.4. **IR (ATR):** 2977, 1732, 1648, 1493, 1384, 1260, 1154, 1069, 979 cm<sup>-1</sup>. **HRMS (ESI):** *m/z* [M+H]<sup>+</sup> calcd for C<sub>26</sub>H<sub>26</sub>O<sub>3</sub>N<sup>+</sup>: 400.1907; found 400.1907.

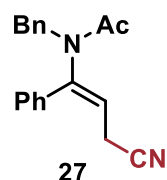

**(E)-N-Benzyl-N-(3-cyano-1-phenylprop-1-en-1-yl)acetamide (27):**

Prepared according to the general procedure III, the chromatographic purification using PE and EA (5 : 1) as the eluent afforded **27** as a white solid. (0.114 mmol, 33.1 mg, 76% yield, *E/Z* = 10:1). **Melting Point:** 90-92 °C. **<sup>1</sup>H NMR (400 MHz, CDCl<sub>3</sub>)** δ 7.44 (s, 3H), 7.33 – 7.09 (m, 7H), 5.33 – 5.29 (m, 1H), 4.50 (s, 2H), 3.16 (d, *J* = 7.7 Hz, 2H), 2.21 (s, 3H). **<sup>13</sup>C NMR (101 MHz, CDCl<sub>3</sub>)** δ 170.4, 144.5, 137.0, 133.3, 130.1, 129.3, 128.9, 128.7, 128.6, 127.7, 117.9, 116.8, 49.3, 22.5, 17.5. **IR (ATR):** 2971, 1731, 1651, 1384, 1264, 1066, 922 cm<sup>-1</sup>. **HRMS (ESI):** *m/z* [M+H]<sup>+</sup> calcd for C<sub>19</sub>H<sub>19</sub>O<sub>2</sub>N<sup>+</sup>: 291.1492; found 291.1493.

2.5. General procedure for the synthesis of (alkoxycarbonyl)methylated oxindoles

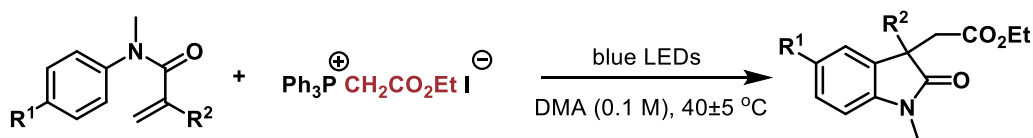

General procedures IV: In a nitrogen-filled glove box, a 10-mL vial equipped with a magnetic stirring bar was charged sequentially with N-phenyl acrylamides (0.15 mmol), triphenylphosphonium salt (0.3 mmol, 2.0 equiv.) and DMA (1.5 mL). The vial was closed and



removed from the glove box. The resulting mixture was allowed to stir at  $40 \pm 5$  °C under blue LED (100 W) irradiation for overnight as monitored by TLC. Upon completion, solvent was removed under vacuum and the residue was subjected to silica gel chromatography using petroleum ether and ethyl acetate as eluent to afford the desired product.

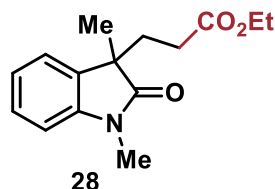

**Ethyl 3-(1,3-dimethyl-2-oxoindolin-3-yl)propanoate (28):**

Prepared according to the general procedure IV, the chromatographic purification using PE and EA (10 : 1) as the eluent afforded **28** as a colorless oil (0.055 mmol, 14.4 mg, 55% yield). **<sup>1</sup>H NMR (400 MHz, CDCl<sub>3</sub>)**  $\delta$  7.27 – 7.22 (m, 1H), 7.16 (d,  $J = 7.8$  Hz, 1H), 7.07 – 7.02 (m, 1H), 6.82 (d,  $J = 7.7$  Hz, 1H), 4.04 – 3.91 (m, 2H), 3.19 (s, 3H), 2.25 – 2.00 (m, 3H), 1.90 – 1.77 (m, 1H), 1.36 (s, 3H), 1.14 (t,  $J = 7.1$  Hz, 3H). **<sup>13</sup>C NMR (101 MHz, CDCl<sub>3</sub>)**  $\delta$  180.0, 172.8, 143.3, 133.0, 128.1, 122.8, 122.7, 108.1, 60.5, 47.7, 33.1, 29.7, 26.2, 23.7, 14.2. **IR (ATR):** 2974, 1706, 1609, 1460, 1376, 1302, 1249, 1175, 1103, 1027, 750 cm<sup>-1</sup>. **HRMS (ESI):**  $m/z$  [M+H]<sup>+</sup> calcd for C<sub>15</sub>H<sub>20</sub>O<sub>3</sub>N<sup>+</sup>: 262.1438; found 262.1440.

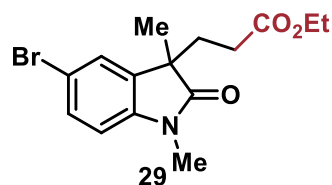

**Ethyl 3-(5-bromo-1,3-dimethyl-2-oxoindolin-3-yl)propanoate (29):**

Prepared according to the general procedure IV, the chromatographic purification using PE and EA (10 : 1) as the eluent afforded **29** as a colorless oil (0.113 mmol, 38.1 mg, 75% yield). **<sup>1</sup>H NMR (400 MHz, CDCl<sub>3</sub>)**  $\delta$  7.40 – 7.37 (m, 1H), 7.28 – 7.26 (m, 1H), 6.72 – 6.68 (m, 1H), 4.02 – 3.97 (m, 2H), 3.17 (s, 3H), 2.25 – 1.98 (m, 3H), 1.92 – 1.80 (m, 1H), 1.36 (s, 3H), 1.16 (t,  $J = 7.1$  Hz, 3H). **<sup>13</sup>C NMR (101 MHz, CDCl<sub>3</sub>)**  $\delta$  179.3, 172.5, 142.3, 135.1, 131.0, 126.1, 115.4, 109.6, 60.5, 47.9, 32.9, 29.6, 26.3, 23.5, 14.1. **IR (ATR):** 2974, 1712, 1604, 1479, 1345, 1248, 1177, 1109, 1030, 810 cm<sup>-1</sup>. **HRMS (ESI):**  $m/z$  [M+H]<sup>+</sup> calcd for C<sub>15</sub>H<sub>19</sub>O<sub>3</sub>NBr<sup>+</sup>: 340.1543; found 340.0544.

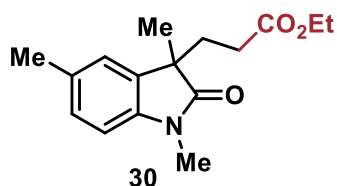

**Ethyl 3-(1,3,5-trimethyl-2-oxoindolin-3-yl)propanoate**

**(30):** Prepared according to the general procedure IV, the chromatographic purification using PE and EA (10 : 1) as the eluent afforded **30** as a colorless oil (0.102 mmol, 28.1 mg, 68%

yield). <sup>1</sup>H NMR (400 MHz, CDCl<sub>3</sub>) δ 7.04 (d, *J* = 7.9 Hz, 1H), 6.97 (s, 1H), 6.70 (d, *J* = 7.9 Hz, 1H), 4.04 – 3.91 (m, 2H), 3.16 (s, 3H), 2.31 (s, 3H), 2.25 – 1.97 (m, 3H), 1.88 – 1.79 (m, 1H), 1.34 (s, 3H), 1.14 (t, *J* = 7.1 Hz, 3H). <sup>13</sup>C NMR (101 MHz, CDCl<sub>3</sub>) δ 180.0, 172.9, 141.0, 133.1, 132.3, 128.3, 123.6, 107.9, 60.4, 47.7, 33.1, 29.8, 26.3, 23.7, 21.2, 14.2. IR (ATR): 2977, 1704, 1611, 1484, 1377, 1249, 1180, 1060, 889 cm<sup>-1</sup>. HRMS (ESI): *m/z* [M+H]<sup>+</sup> calcd for C<sub>16</sub>H<sub>22</sub>O<sub>3</sub>N<sup>+</sup>: 276.1594; found 276.1596.

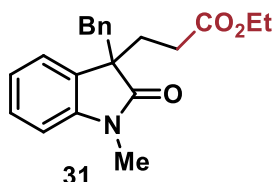

**Ethyl 3-(3-benzyl-1,5-dimethyl-2-oxoindolin-3-yl)propanoate**

**(31):** Prepared according to the general procedure IV, the chromatographic purification using PE and EA (10 : 1) as the eluent afforded **31** as a colorless oil (0.089 mmol, 29.8 mg, 59% yield). <sup>1</sup>H

NMR (400 MHz, CDCl<sub>3</sub>) δ 7.19 – 7.11 (m, 2H), 7.06 – 6.97 (m, 4H), 6.79 (d, *J* = 7.8 Hz, 2H), 6.56 (d, *J* = 7.5 Hz, 1H), 4.04 – 3.91 (m, 2H), 3.14 (d, *J* = 12.9 Hz, 1H), 3.01 (d, *J* = 12.9 Hz, 1H), 2.93 (s, 3H), 2.44 – 2.20 (m, 2H), 2.10 – 1.99 (m, 1H), 1.87 – 1.76 (m, 1H), 1.14 (t, *J* = 7.2 Hz, 3H). <sup>13</sup>C NMR (101 MHz, CDCl<sub>3</sub>) δ 177.4, 171.7, 142.8, 134.5, 129.0, 128.8, 127.1, 126.5, 125.5, 122.7, 121.2, 106.8, 59.4, 53.0, 43.2, 30.6, 28.6, 24.8, 13.1. IR (ATR): 2979, 1705, 1608, 1459, 1379, 1250, 1169, 1056, 872 cm<sup>-1</sup>. HRMS (ESI): *m/z* [M+H]<sup>+</sup> calcd for C<sub>21</sub>H<sub>24</sub>O<sub>3</sub>N<sup>+</sup>: 338.1751; found 338.1751.

### 3. Mechanistic studies

#### 3.1. UV/vis absorption spectrometry.

UV/vis absorption spectra were recorded using DMA as solvent in 1 cm path quartz cuvettes using a Mettler Toledo UV-5 UV/Vis spectrometer.

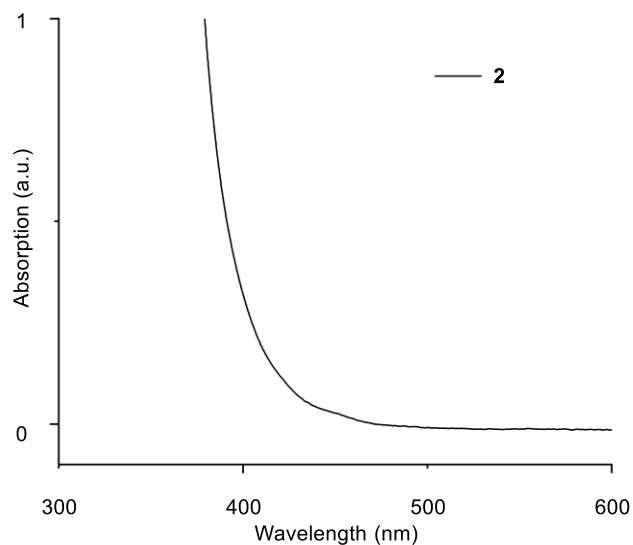

**Figure S2:** UV/vis spectrum of **2** (recorded 0.2 mmol in 1.0 mL DMA)

### 3.2 Control experiments

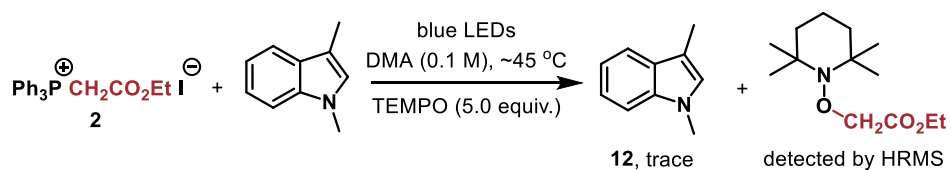

In a nitrogen-filled glove box, a 10-mL vial equipped with a magnetic stirring bar was charged sequentially with 1,3-dimethylindole (0.15 mmol, 1.0 equiv.), triphenylphosphonium salt **2** (0.3 mmol, 2.0 equiv.), TEMPO (0.75 mmol, 5.0 equiv.) and DMA (1.5 mL). The vial was closed and removed from the glove box. The resulting mixture was allowed to stir at  $40 \pm 5\text{ }^{\circ}\text{C}$  under blue LED (100 W) irradiation for overnight. The desired product was observed with trace yield and the trapped radical species was detected by HRMS.

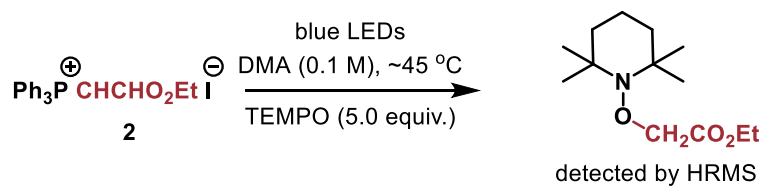

In a nitrogen-filled glove box, a 10-mL vial equipped with a magnetic stirring bar was charged sequentially with triphenylphosphonium salt **2** (0.1 mmol, 1.0 equiv.), TEMPO (0.5 mmol, 5.0

equiv.) and DMA (1.0 mL). The vial was closed and removed from the glove box. The resulting mixture was allowed to stir at  $40 \pm 5$  °C under blue LED (100 W) irradiation for overnight. The trapped radical species was detected by HRMS.

**HRMS (ESI):**  $m/z$   $[M+H]^+$  calcd for  $C_{13}H_{26}O_3N^+$ : 244.1907; found 244.1899.

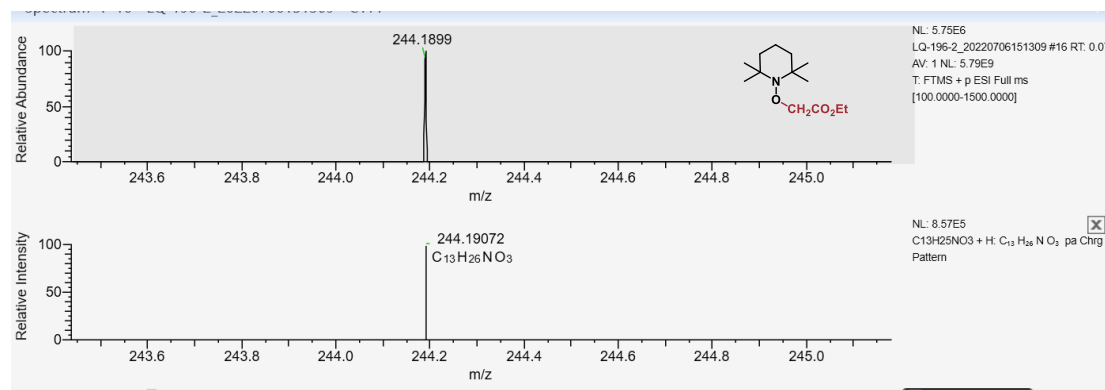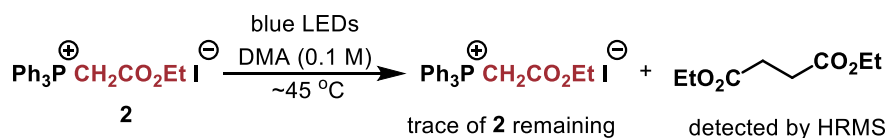

In a nitrogen-filled glove box, a 10-mL vial equipped with a magnetic stirring bar was charged sequentially with triphenylphosphonium salt **2** (0.1 mmol) and DMA (1.0 mL). The vial was closed and removed from the glove box. The resulting mixture was allowed to stir at  $40 \pm 5$  °C under blue LED (100 W) irradiation for overnight. Trace of **2** was observed from the reaction mixture, and the radical dimerization product (diethyl succinate) was detected by HRMS analysis.

**HRMS (ESI):**  $m/z$   $[M+H]^+$  calcd for  $C_8H_{14}O_4Na^+$ : 197.0784; found 197.0778.

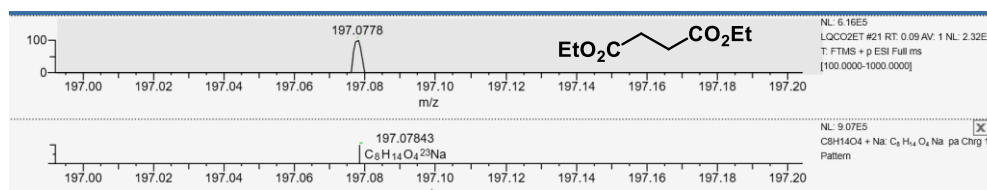

## 4. References

- (1) J. Huang, Zhao, Y. Liu, W. Cao, X. Wu, *Org. Lett.* 2013, **15**, 4338–4341.
- (2) H.-L. Jang, H. T. Kim, E. J. Cho, J. M. Joo, *Asian J. Org. Chem*, 2015, **4**, 1386-1391.

(3) N. Kato, T. Nanjo, Y. Takemoto, *ACS Catal.* 2022, **12**, 7843–7849.

## 5. NMR Spectra

### $^1\text{H}$ NMR of compound 3 (400 MHz in $\text{CDCl}_3$ )

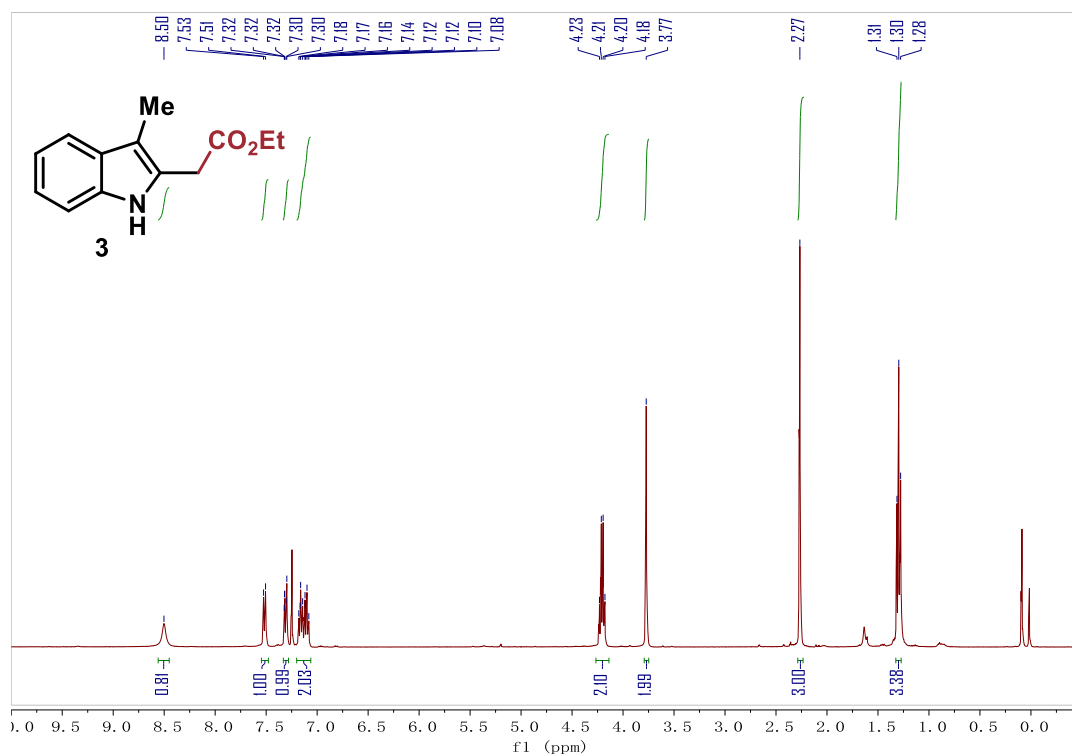

### $^{13}\text{C}$ NMR of compound 3 (101 MHz in $\text{CDCl}_3$ )

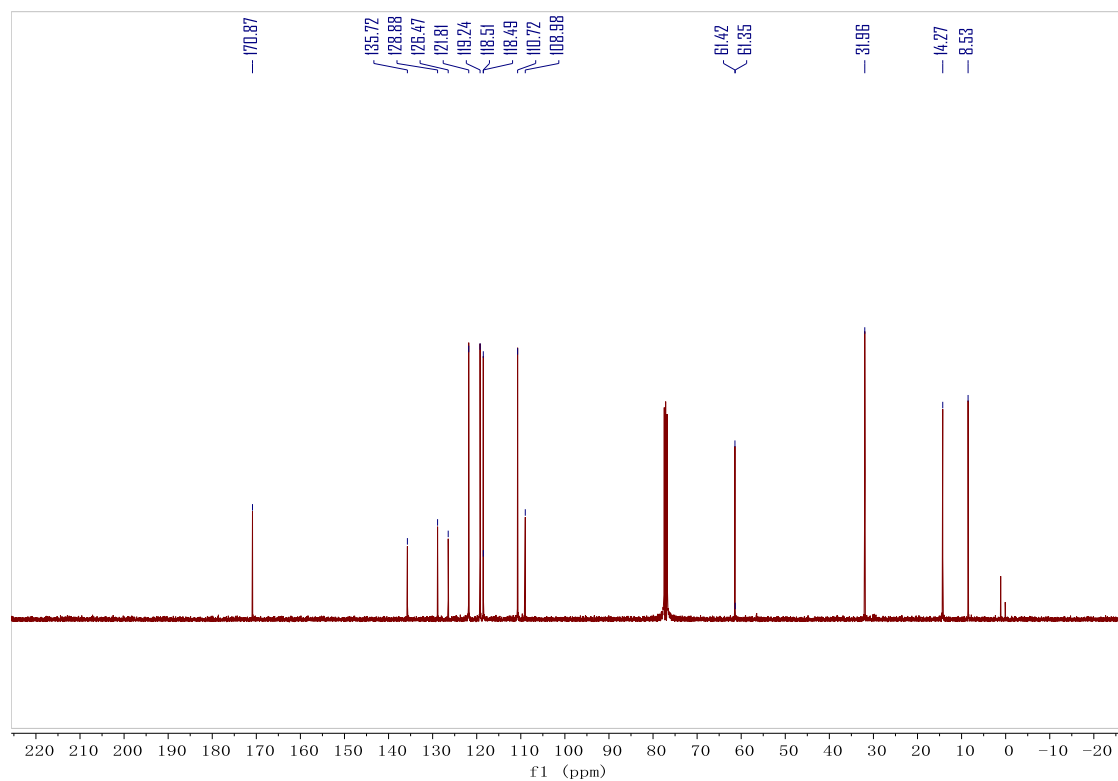

**<sup>1</sup>H NMR of compound 4 (400 MHz in CDCl<sub>3</sub>)**

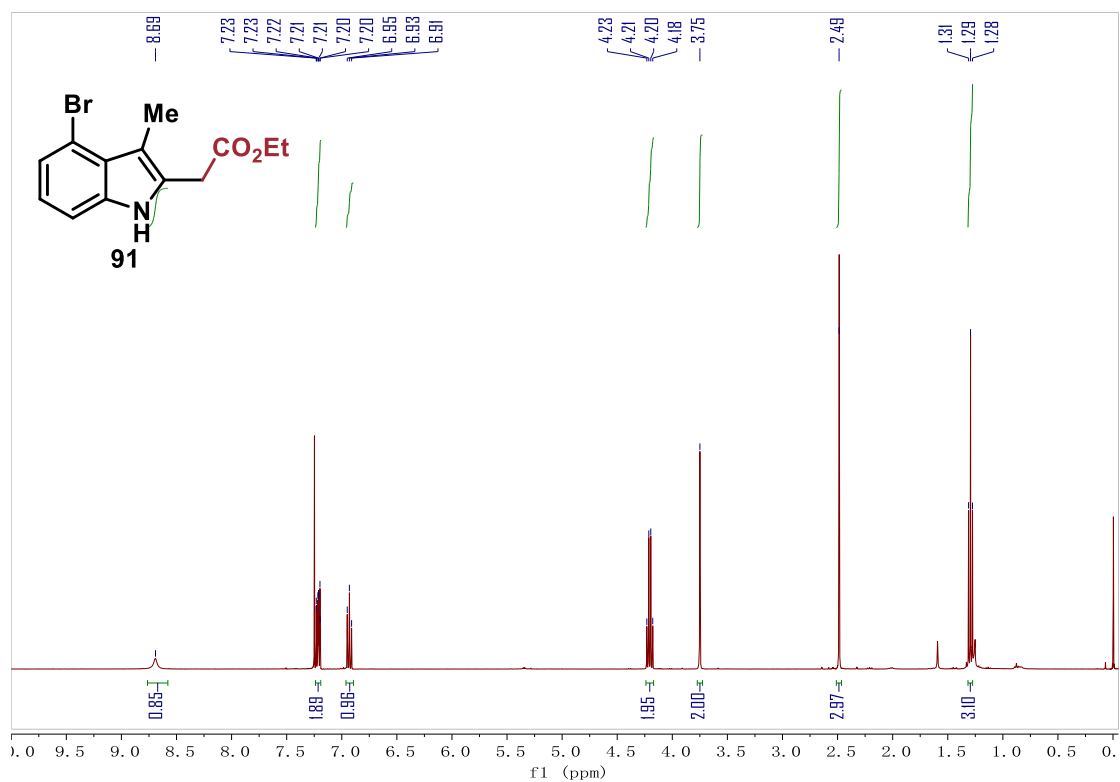

**<sup>13</sup>C NMR of compound 4 (101 MHz in CDCl<sub>3</sub>)**

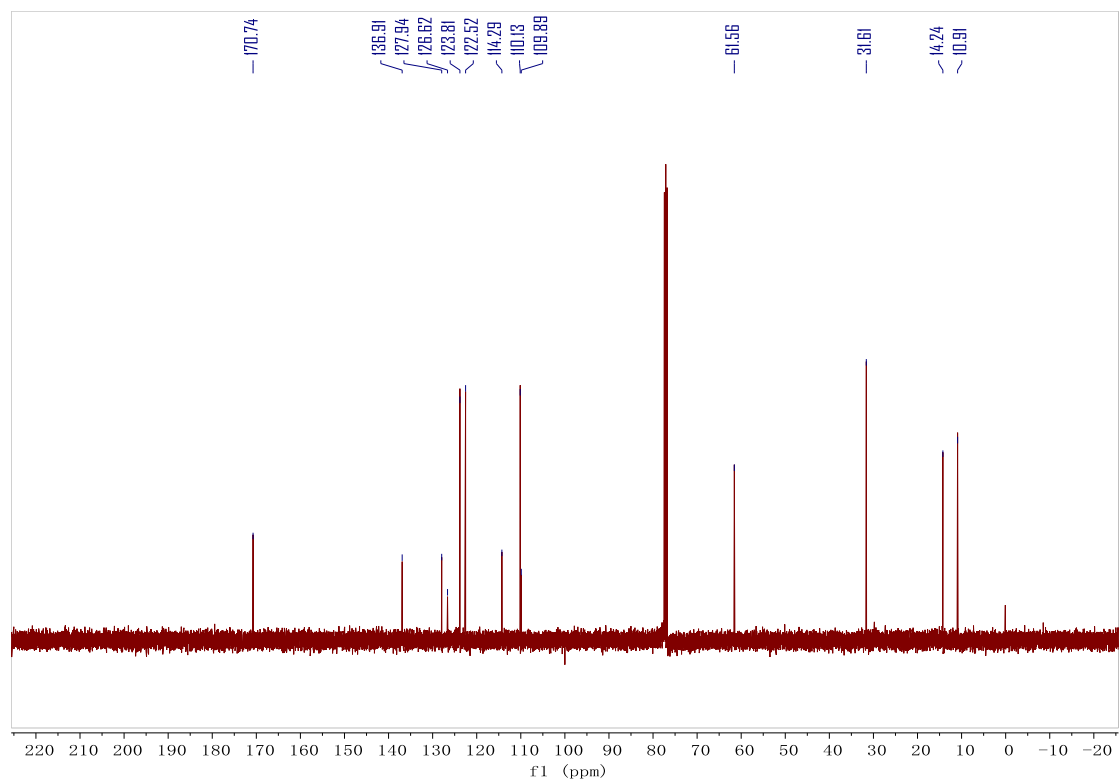

**<sup>1</sup>H NMR of compound 5 (400 MHz in CDCl<sub>3</sub>)**

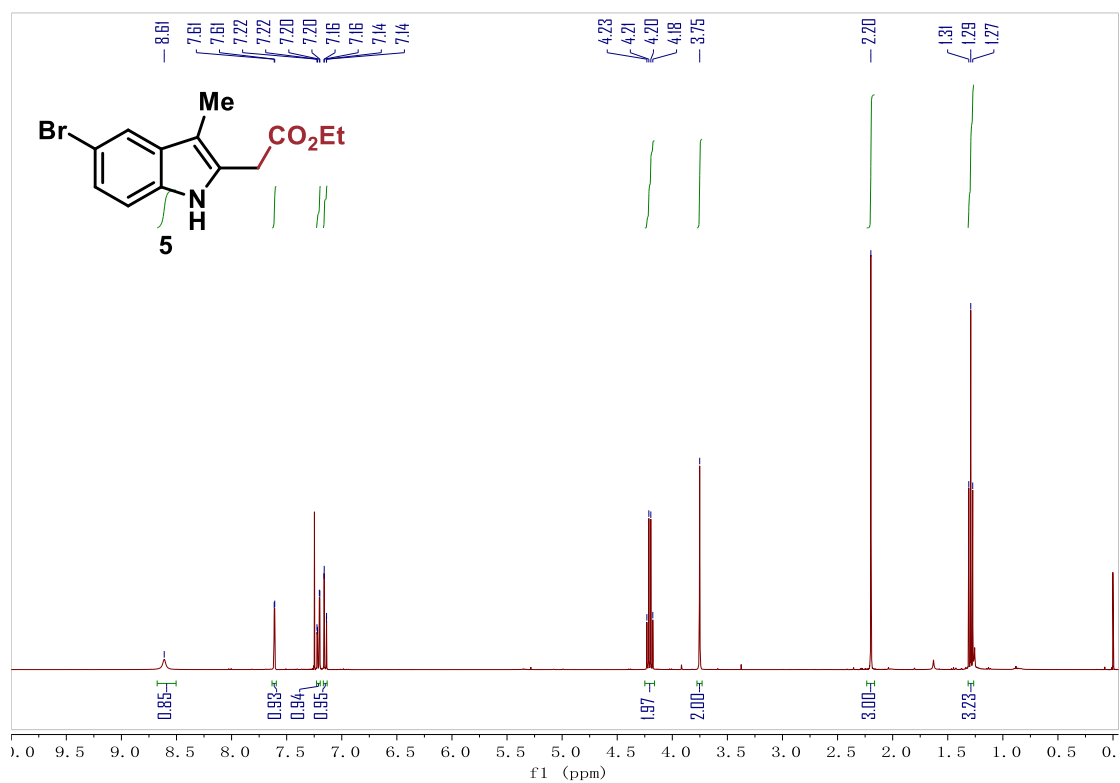

**<sup>13</sup>C NMR of compound 5 (101 MHz in CDCl<sub>3</sub>)**

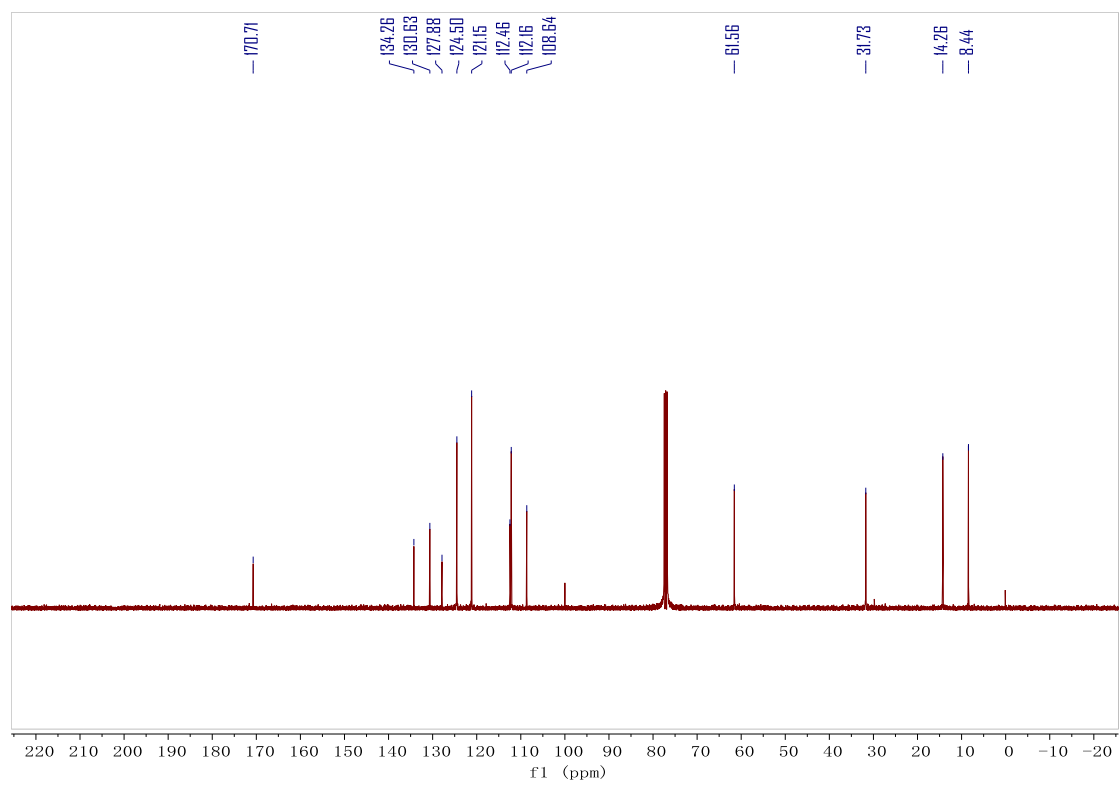



**<sup>1</sup>H NMR of compound 6 (400 MHz in CDCl<sub>3</sub>)**

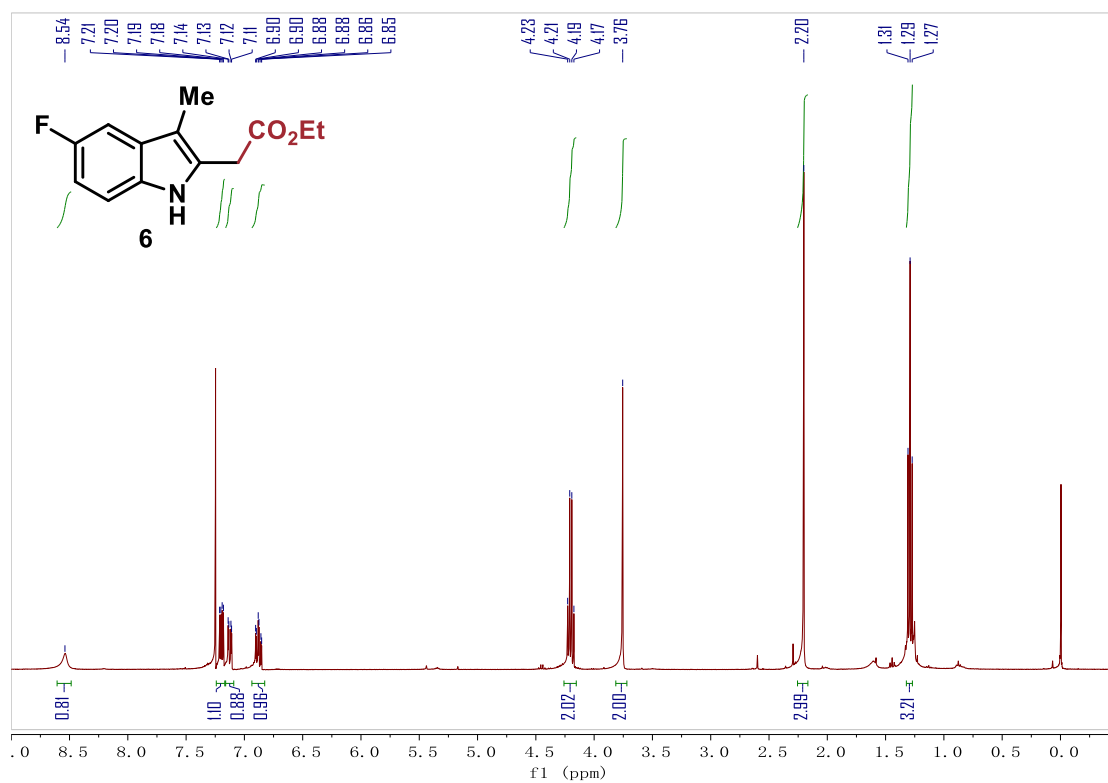

**<sup>13</sup>C NMR of compound 6 (101 MHz in CDCl<sub>3</sub>)**

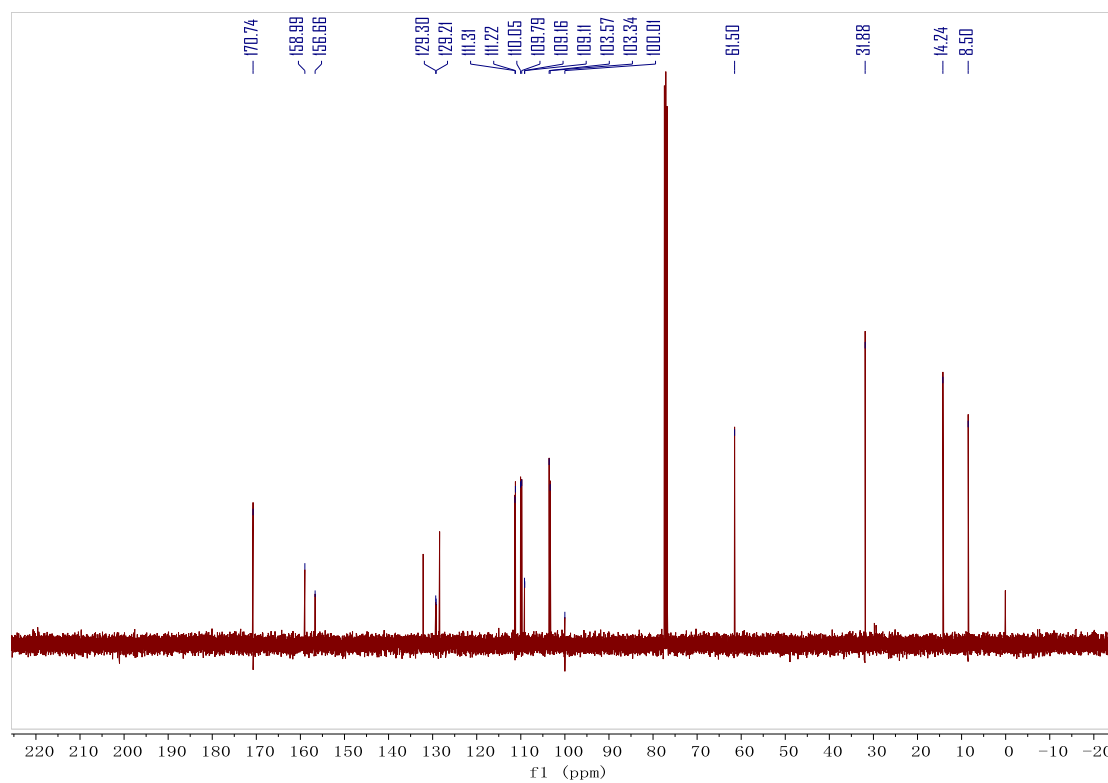

**<sup>1</sup>H NMR of compound 7 (400 MHz in CDCl<sub>3</sub>)**

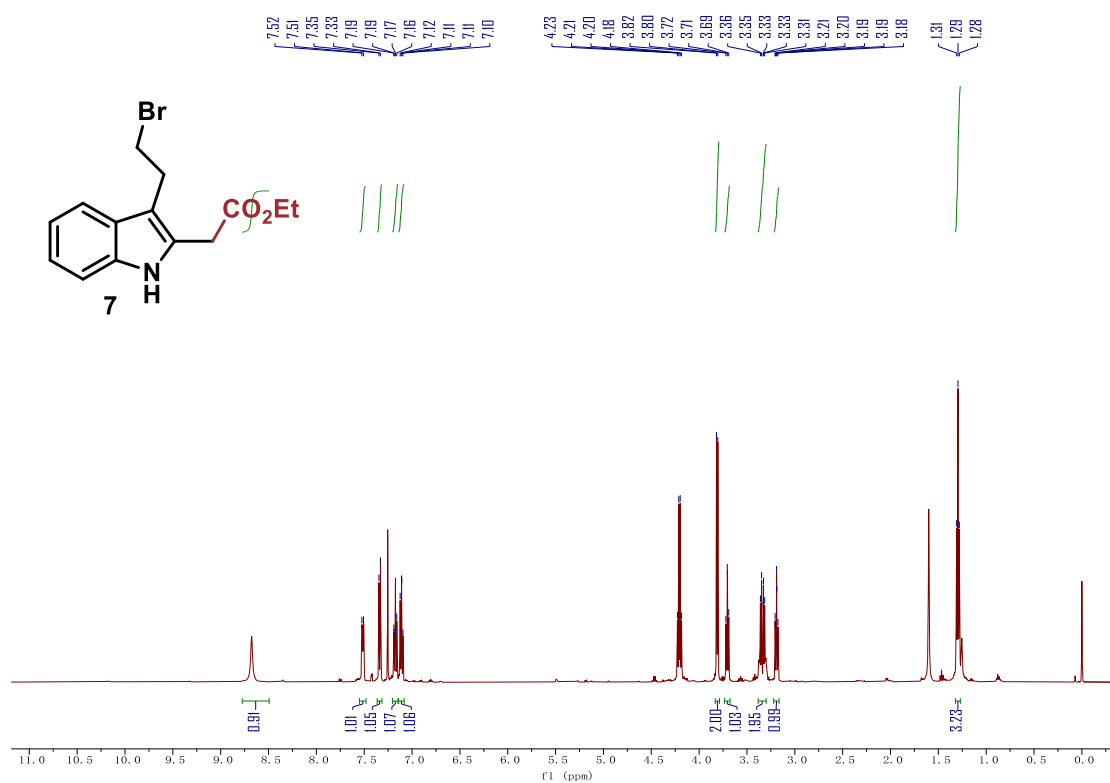

**<sup>13</sup>C NMR of compound 7 (101 MHz in CDCl<sub>3</sub>)**

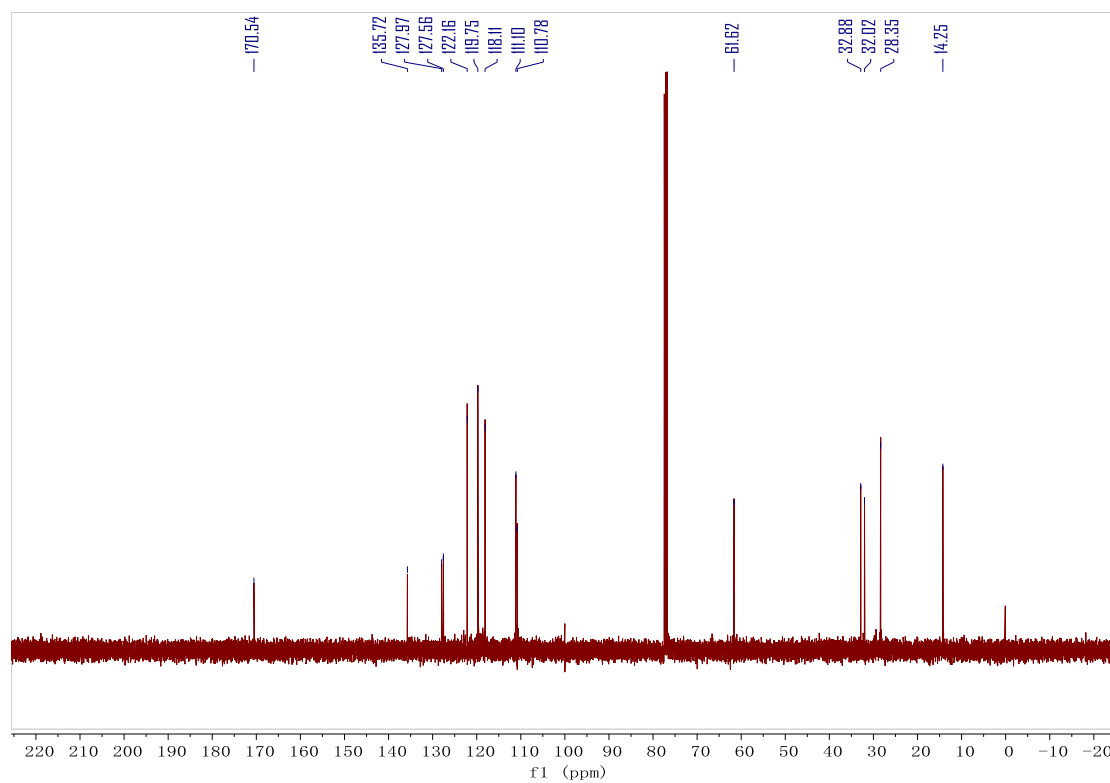

**<sup>1</sup>H NMR of compound 8 (400 MHz in CDCl<sub>3</sub>)**

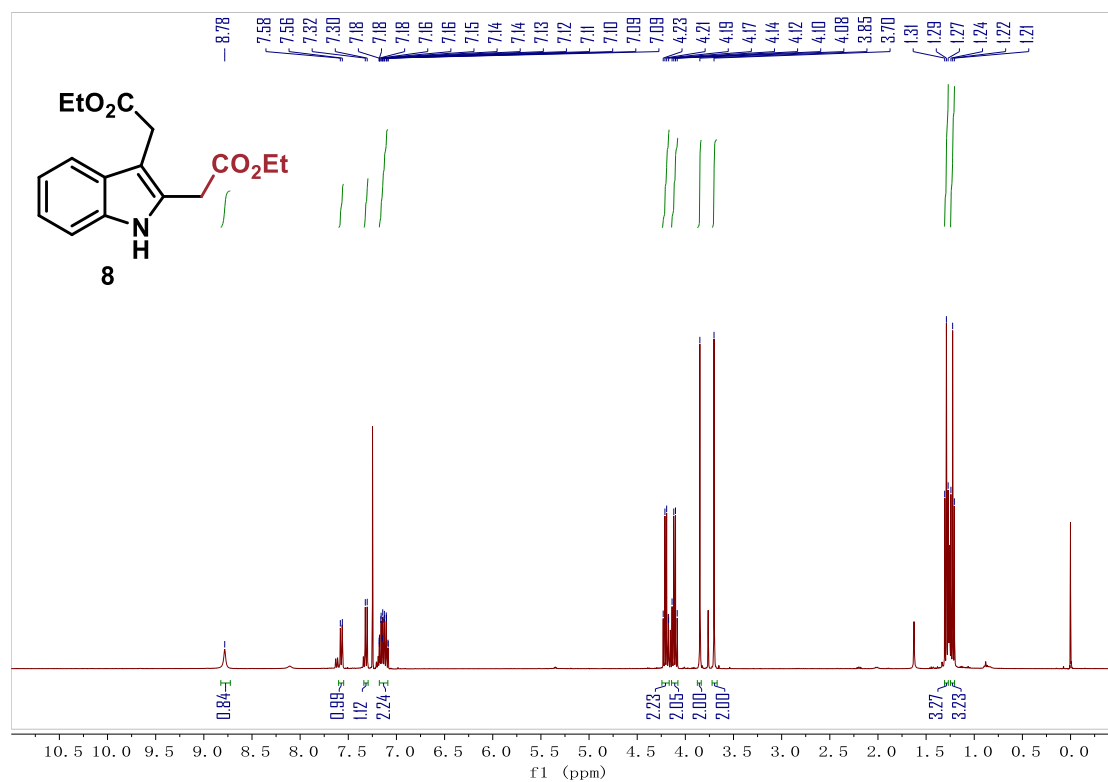

**<sup>13</sup>C NMR of compound 8 (101 MHz in CDCl<sub>3</sub>)**

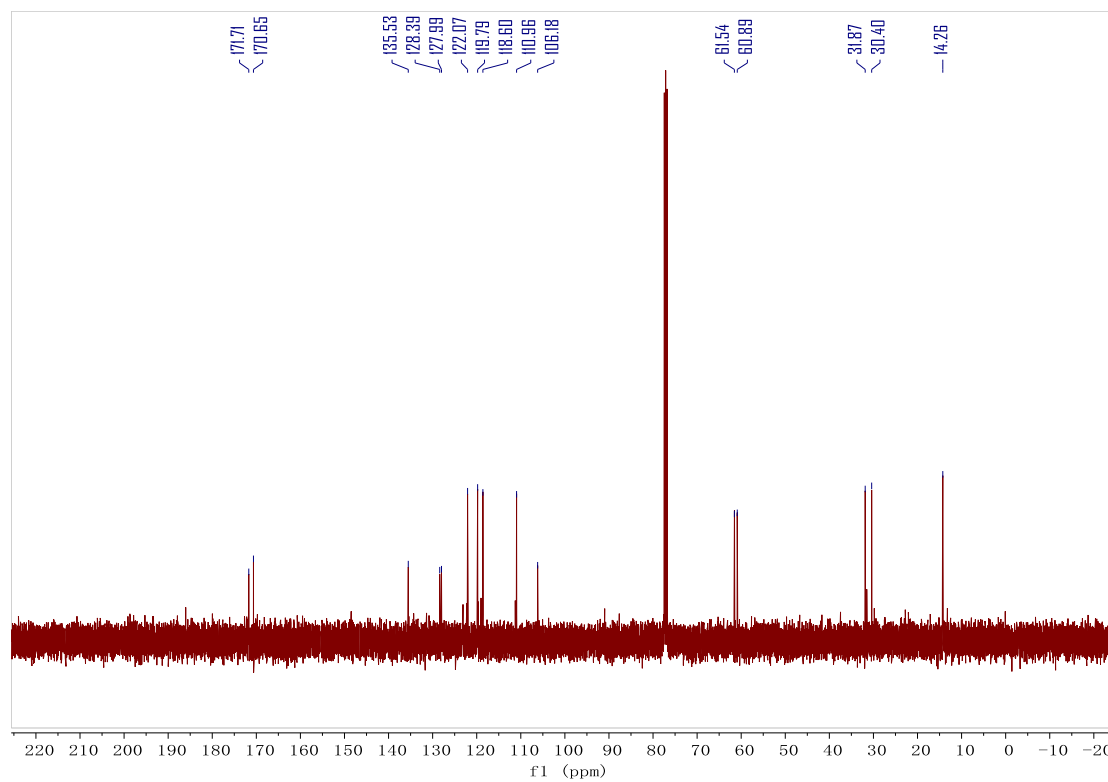

### <sup>1</sup>H NMR of compound 9 (500 MHz in CDCl<sub>3</sub>)

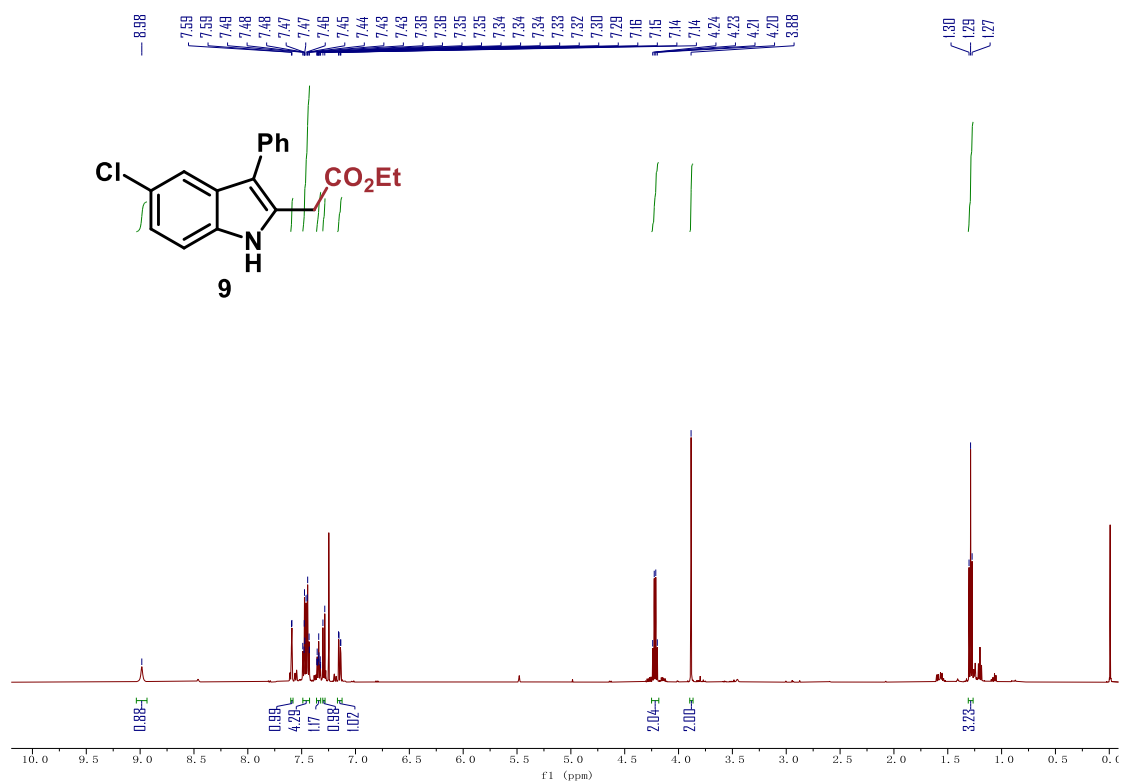

### <sup>13</sup>C NMR of compound 9 (126 MHz in CDCl<sub>3</sub>)

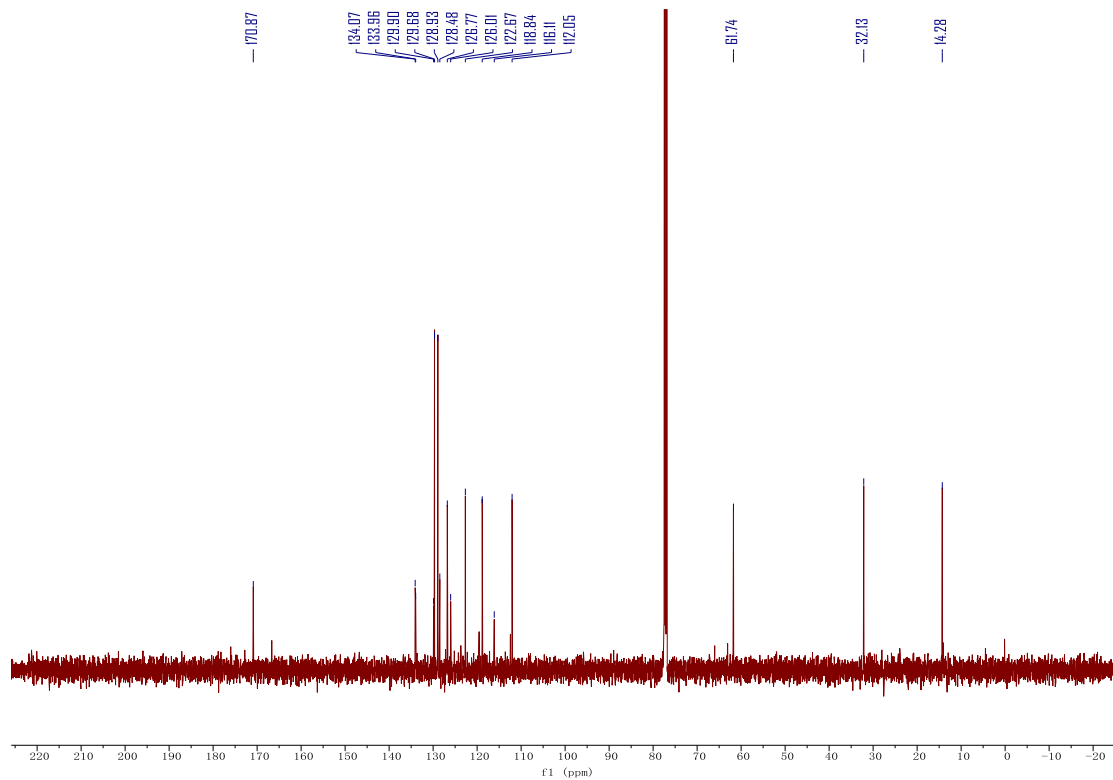

**<sup>1</sup>H NMR of compound 10 (400 MHz in CDCl<sub>3</sub>)**

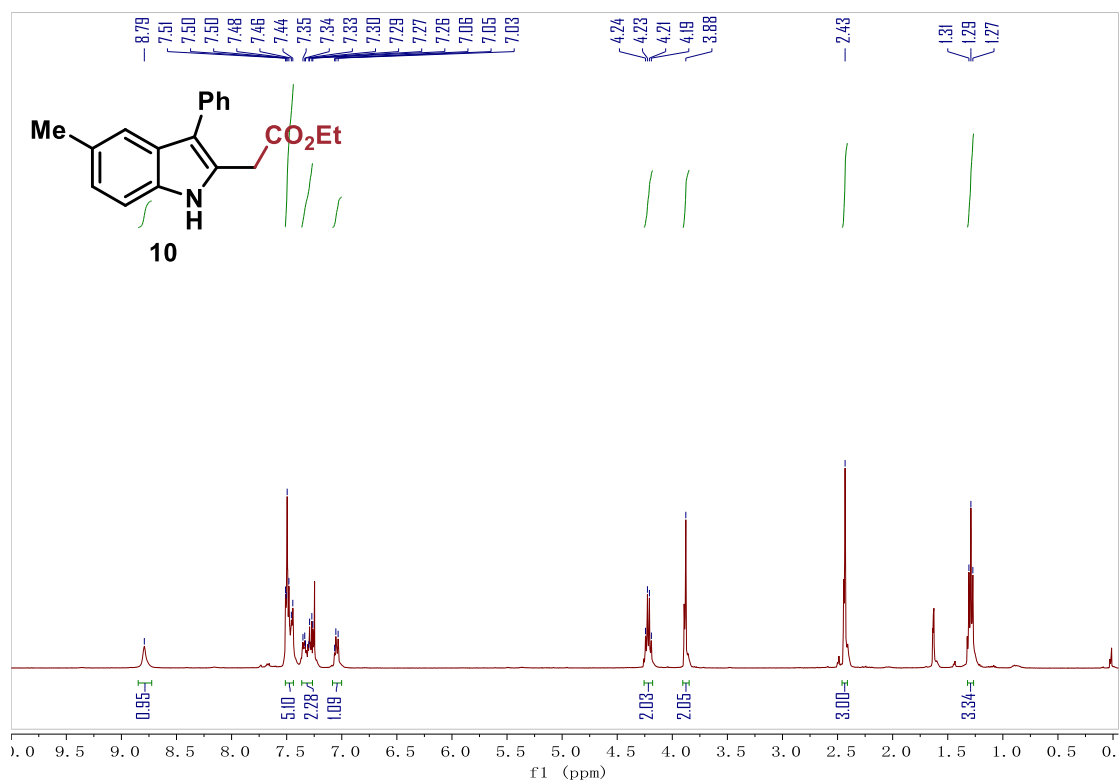

**<sup>13</sup>C NMR of compound 10 (101 MHz in CDCl<sub>3</sub>)**

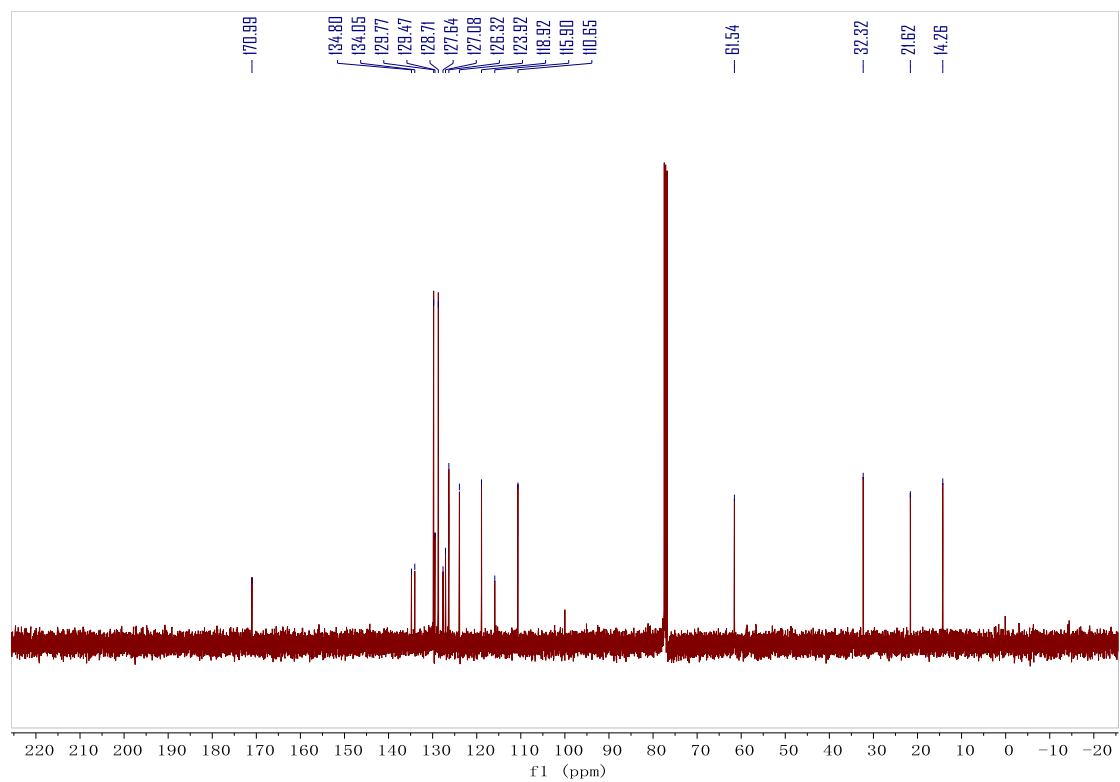

### <sup>1</sup>H NMR of compound 11 (400 MHz in CDCl<sub>3</sub>)

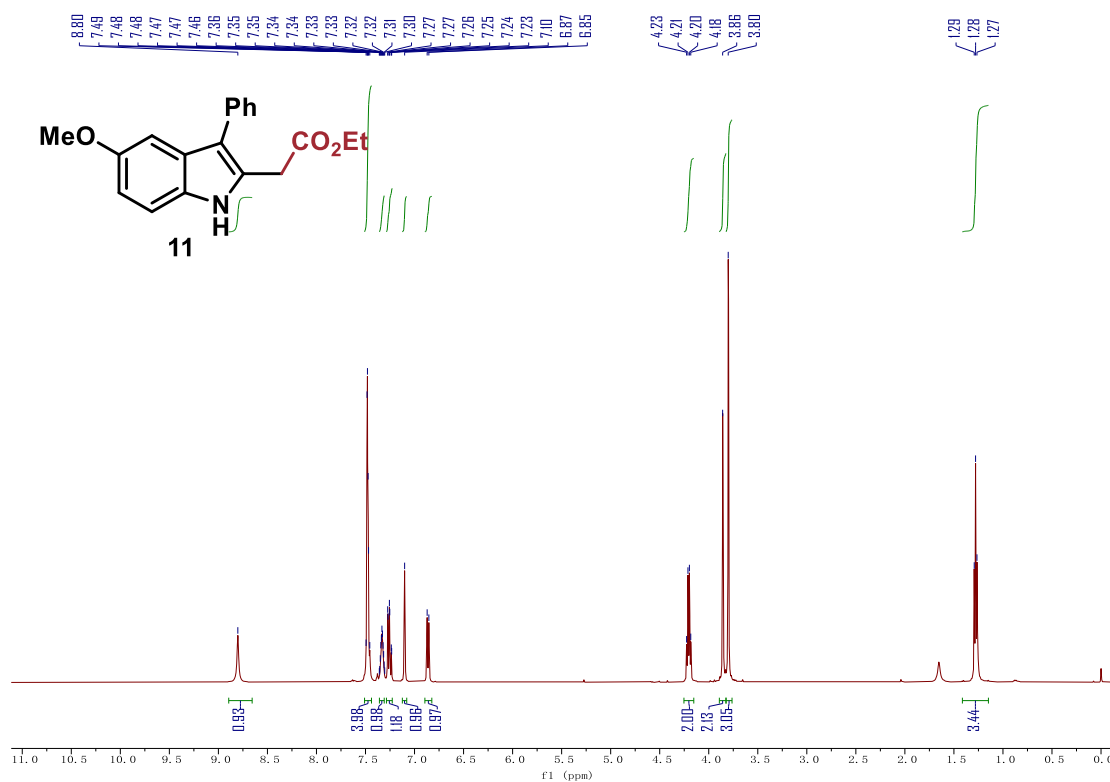

### <sup>13</sup>C NMR of compound 11 (101 MHz in CDCl<sub>3</sub>)

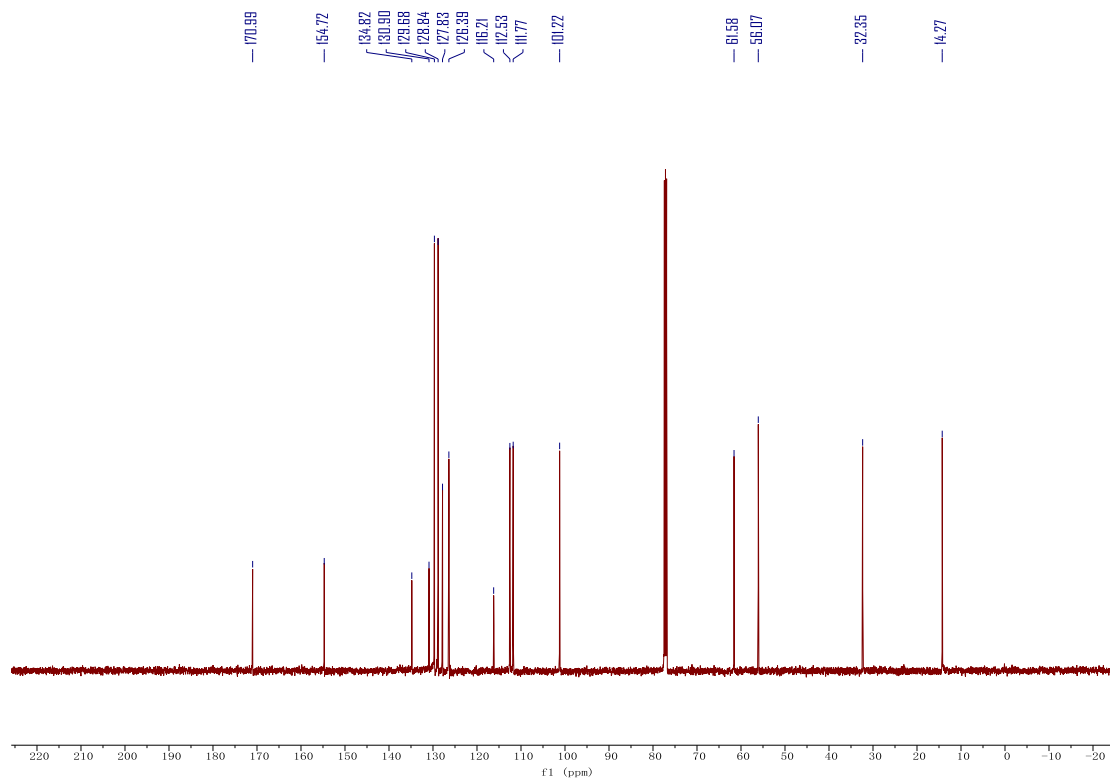

### <sup>1</sup>H NMR of compound 12 (400 MHz in CDCl<sub>3</sub>)

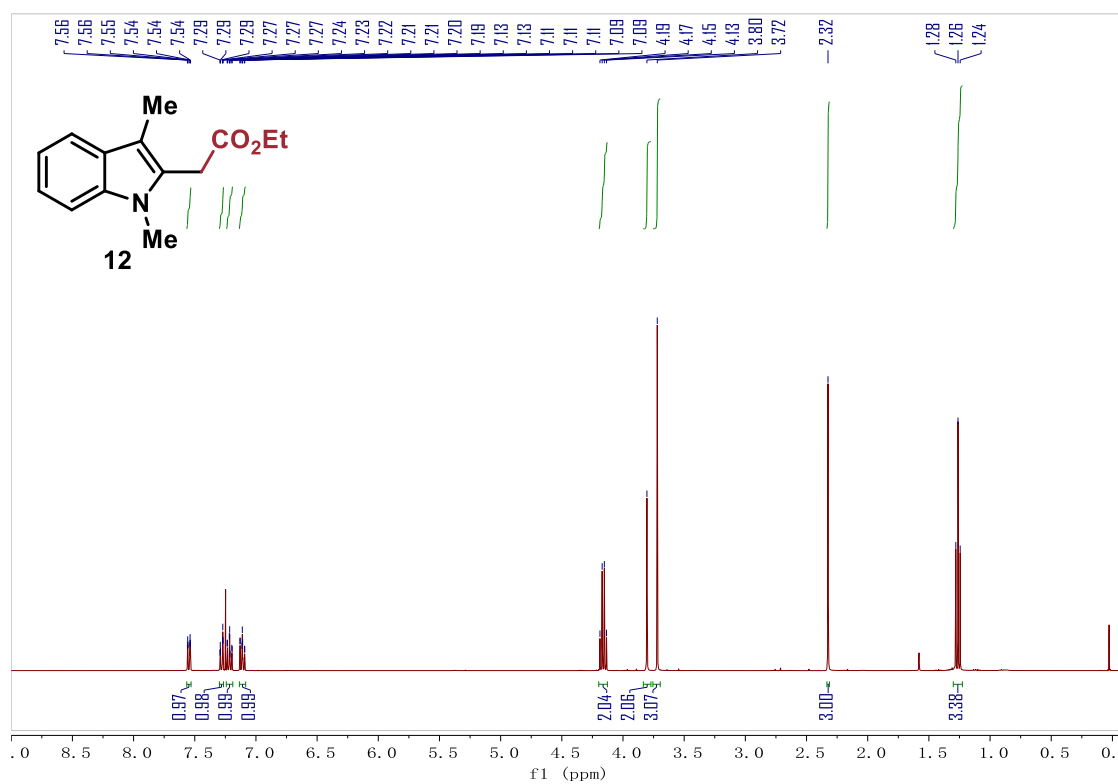

### <sup>13</sup>C NMR of compound 12 (101 MHz in CDCl<sub>3</sub>)

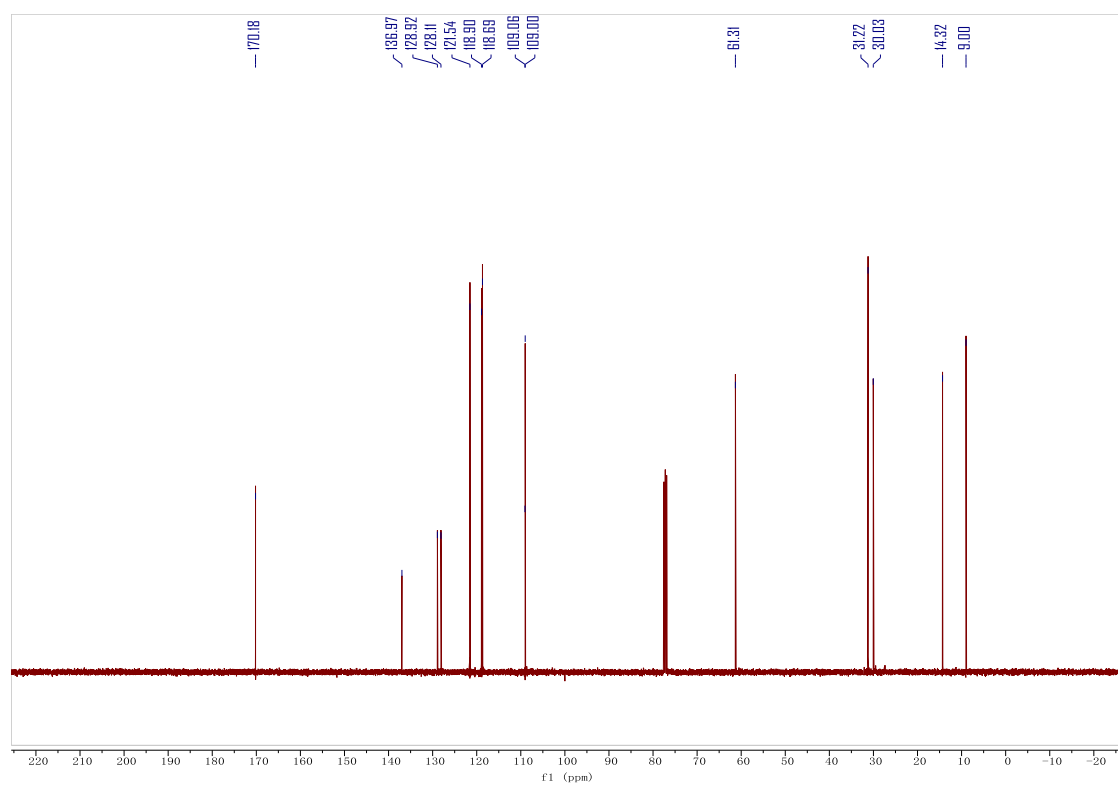

**<sup>1</sup>H NMR of compound 13 (400 MHz in CDCl<sub>3</sub>)**

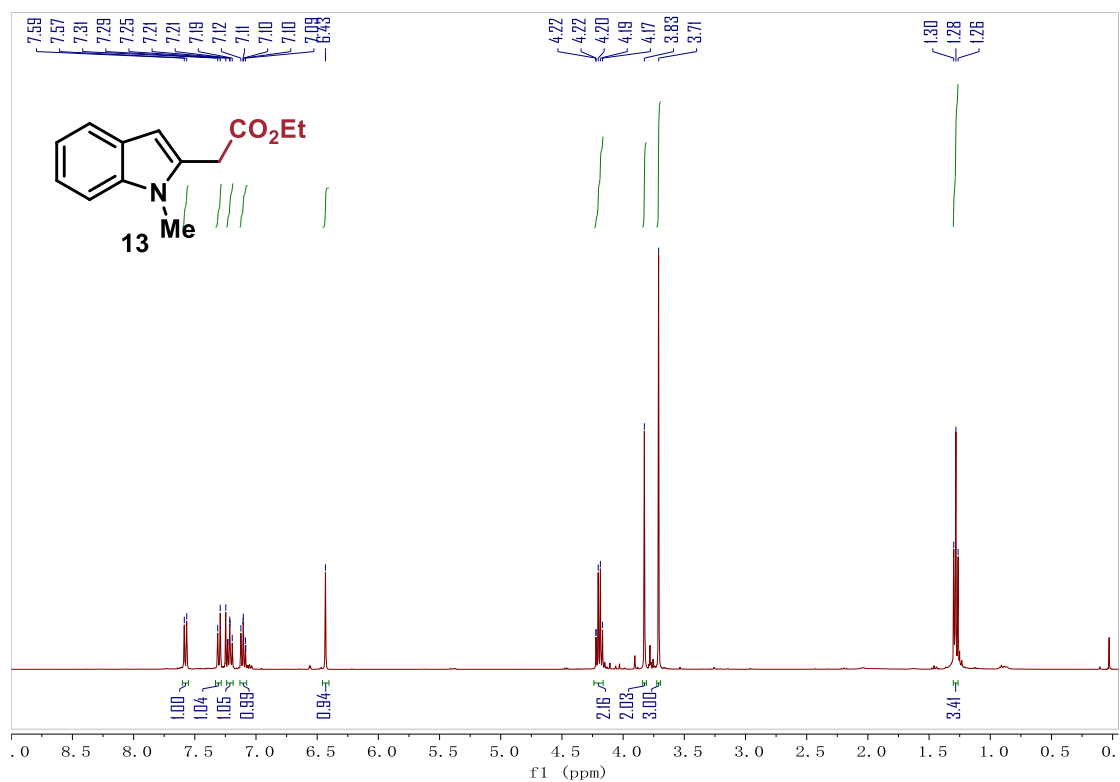

**<sup>13</sup>C NMR of compound 13 (101 MHz in CDCl<sub>3</sub>)**

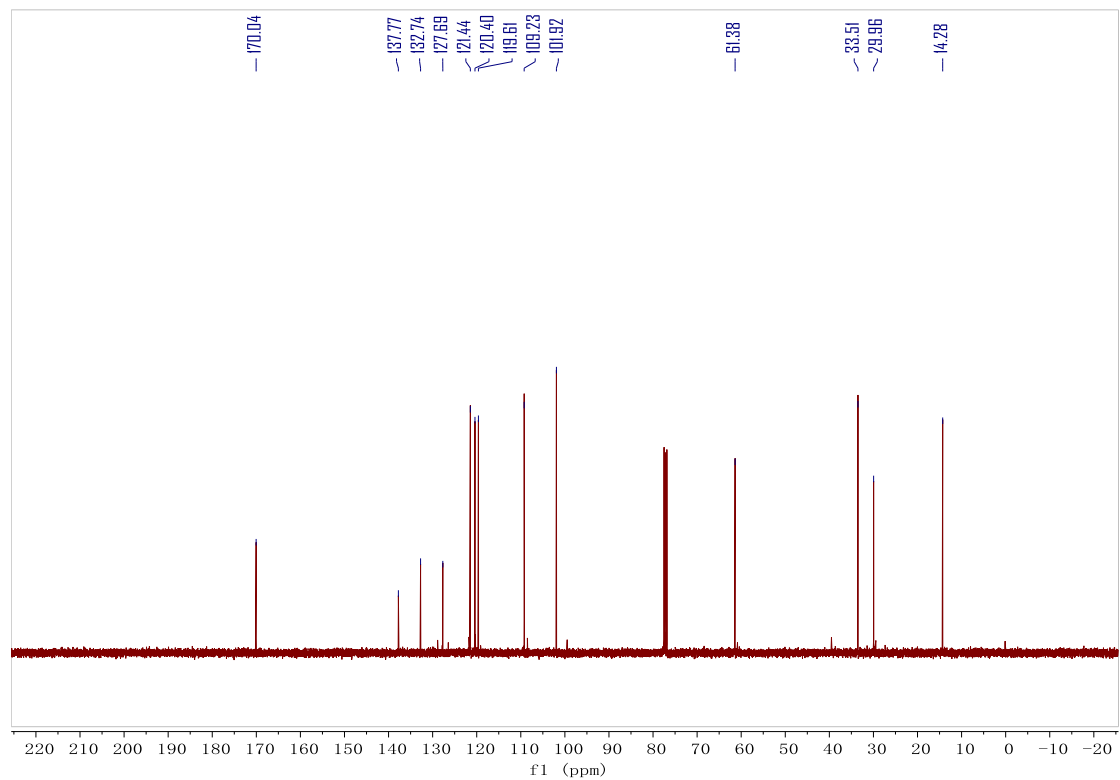



**<sup>1</sup>H NMR of compound 14 (400 MHz in CDCl<sub>3</sub>)**

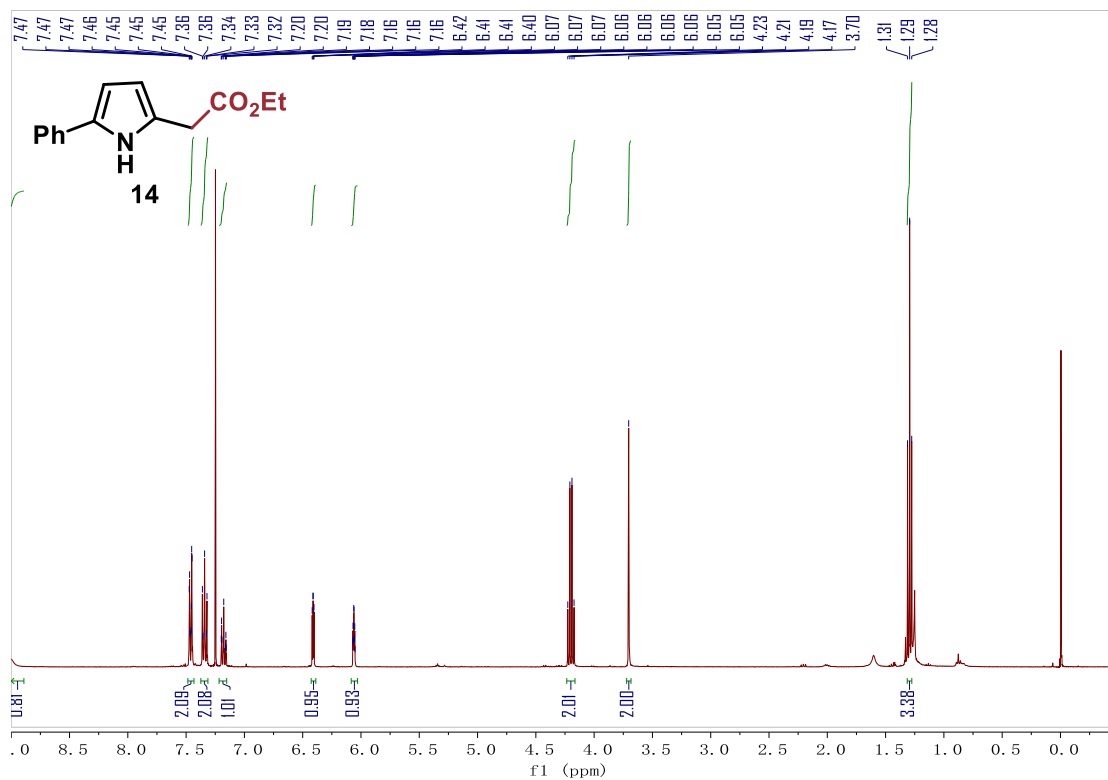

**<sup>13</sup>C NMR of compound 14 (101 MHz in CDCl<sub>3</sub>)**

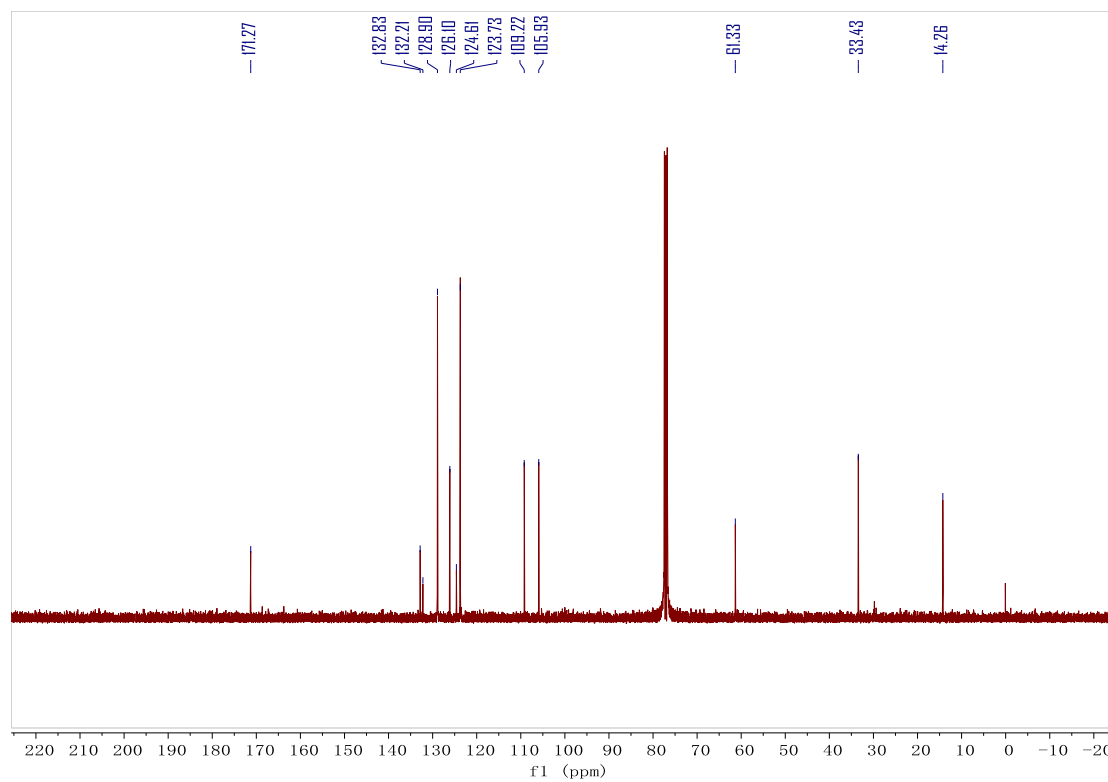

**<sup>1</sup>H NMR of compound 15 (400 MHz in CDCl<sub>3</sub>)**

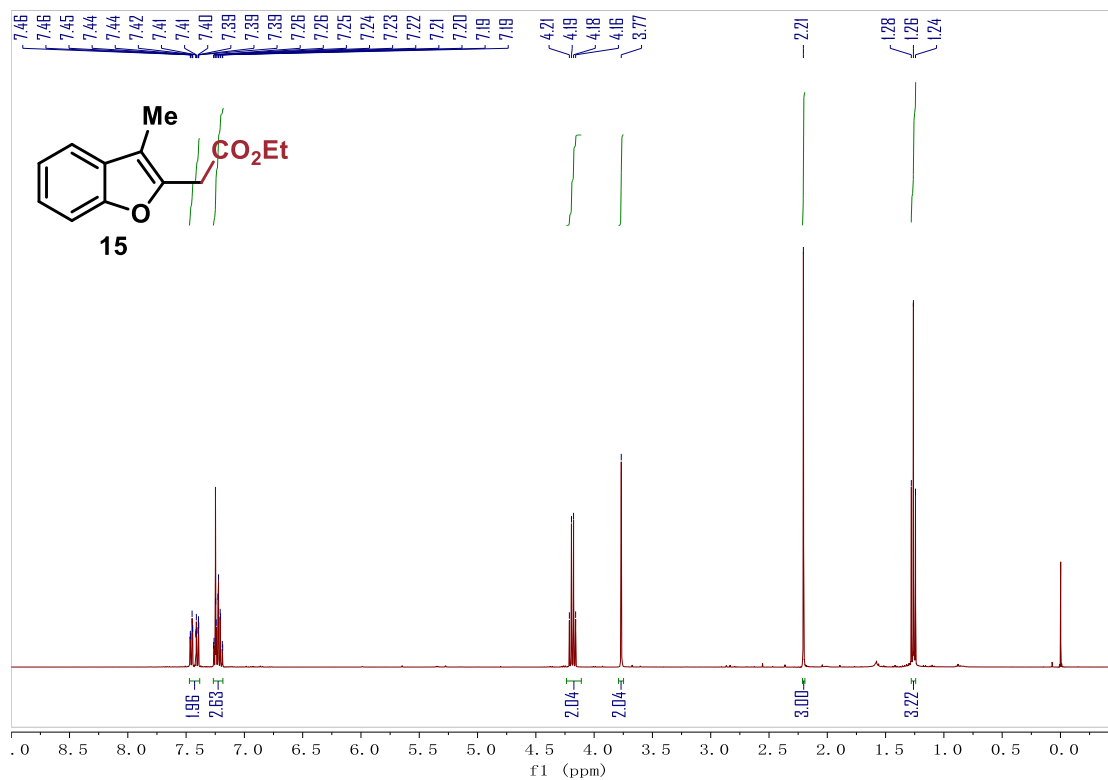

**<sup>13</sup>C NMR of compound 15 (101 MHz in CDCl<sub>3</sub>)**

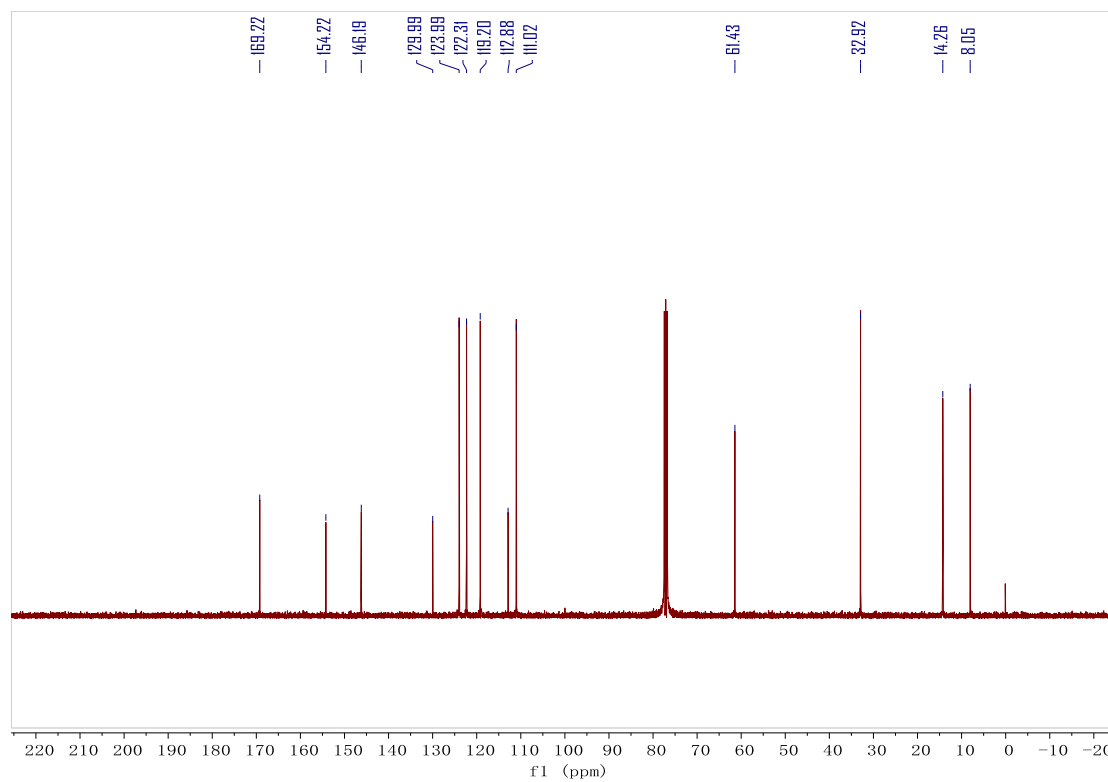

**<sup>1</sup>H NMR of compound 16 (400 MHz in CDCl<sub>3</sub>)**

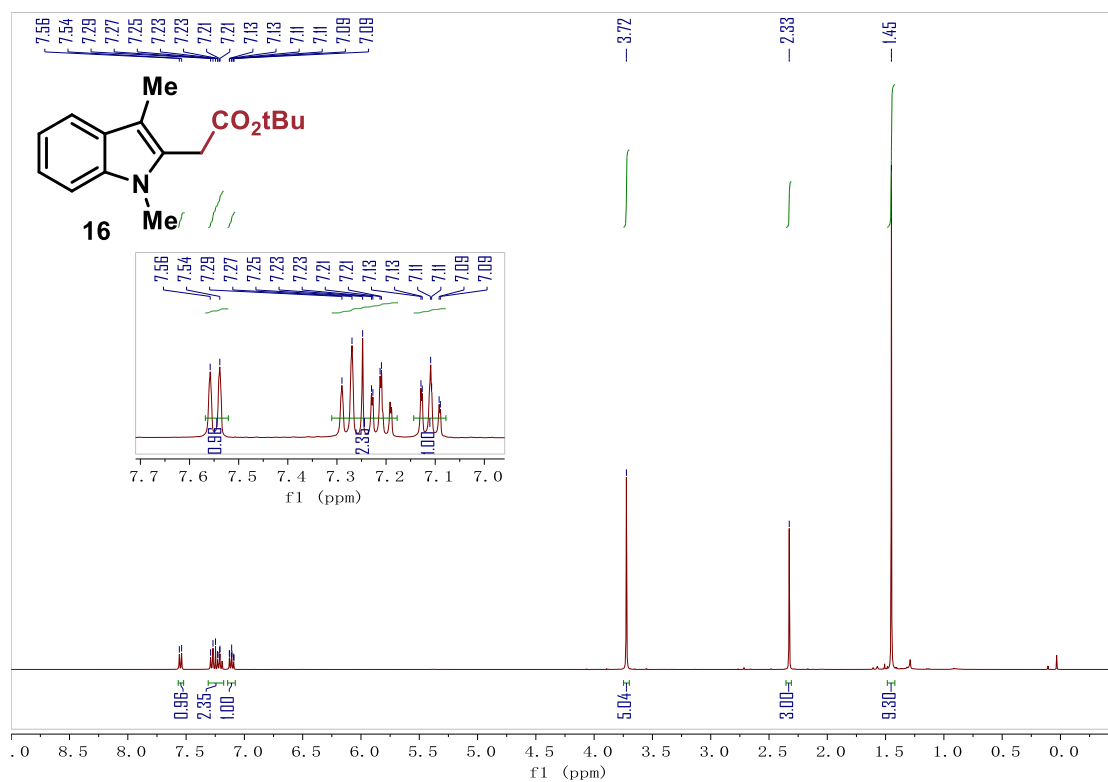

**<sup>13</sup>C NMR of compound 16 (101 MHz in CDCl<sub>3</sub>)**

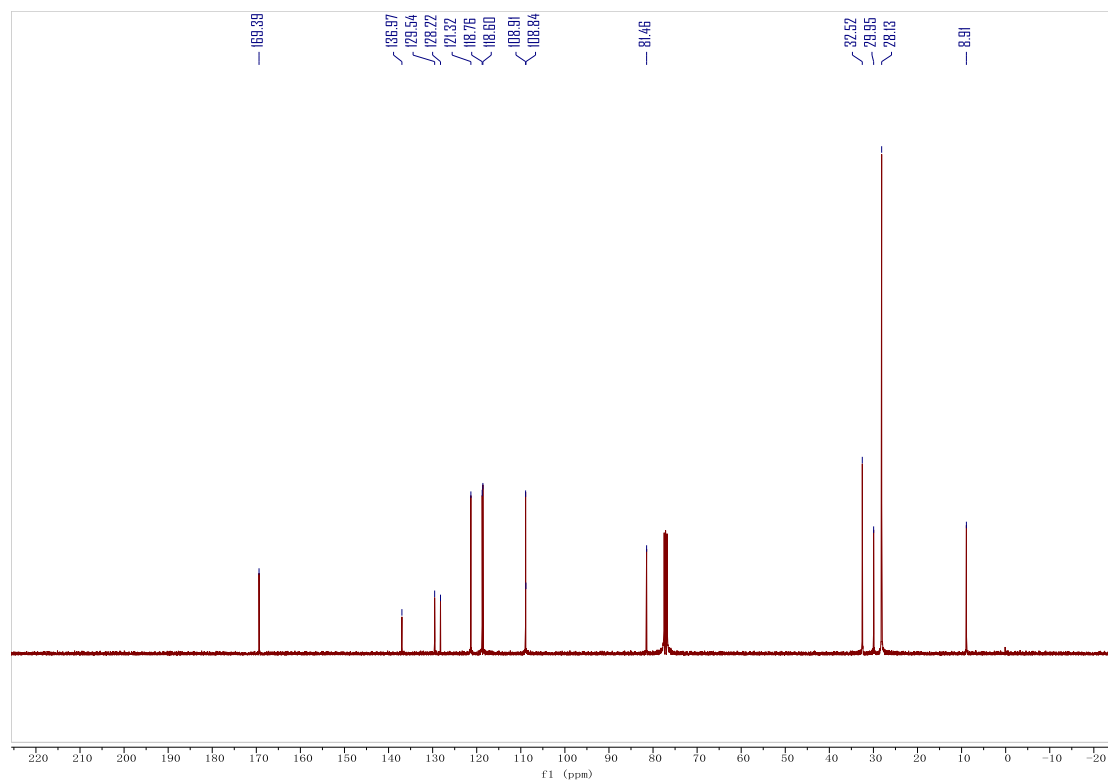

**<sup>1</sup>H NMR of compound 17 (400 MHz in CDCl<sub>3</sub>)**

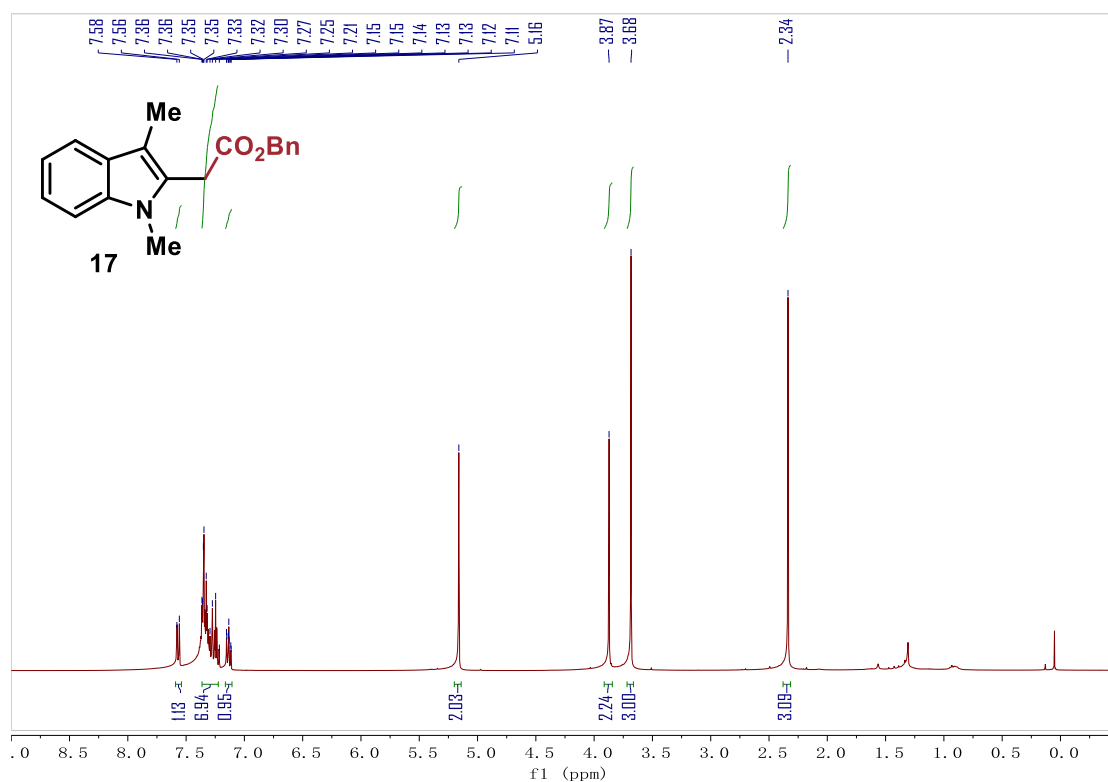

**<sup>13</sup>C NMR of compound 17 (101 MHz in CDCl<sub>3</sub>)**

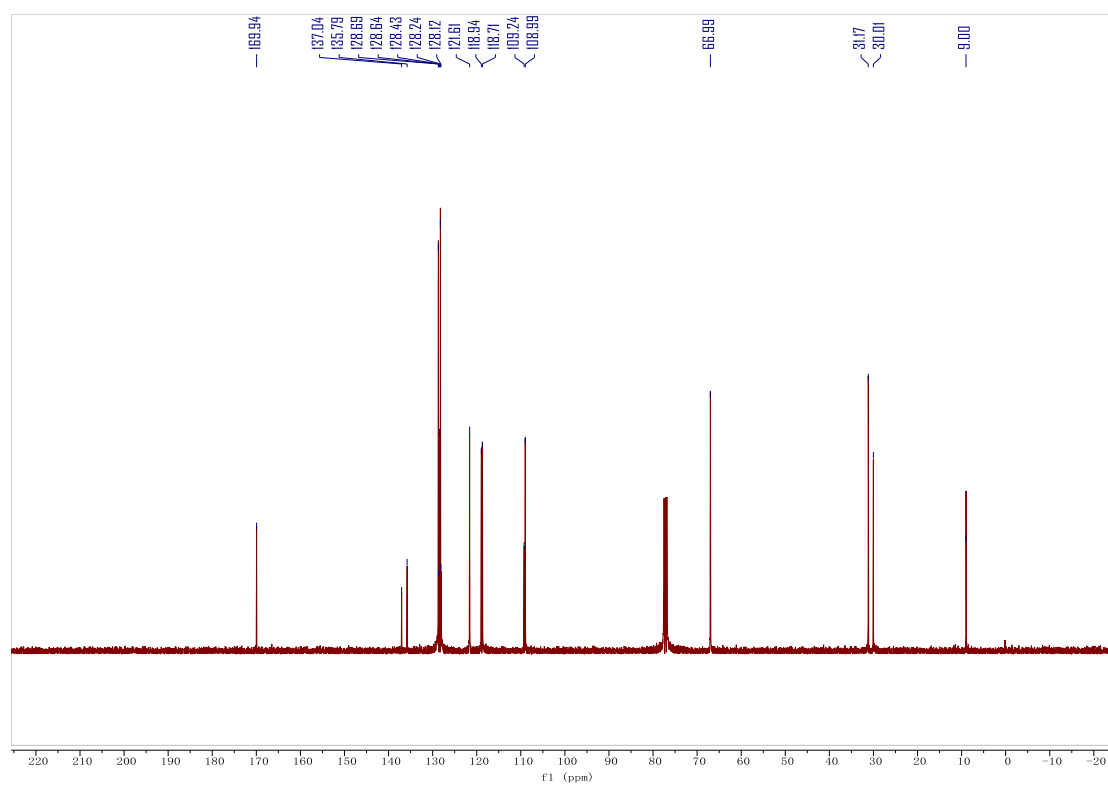

### <sup>1</sup>H NMR of compound 18 (400 MHz in CDCl<sub>3</sub>)

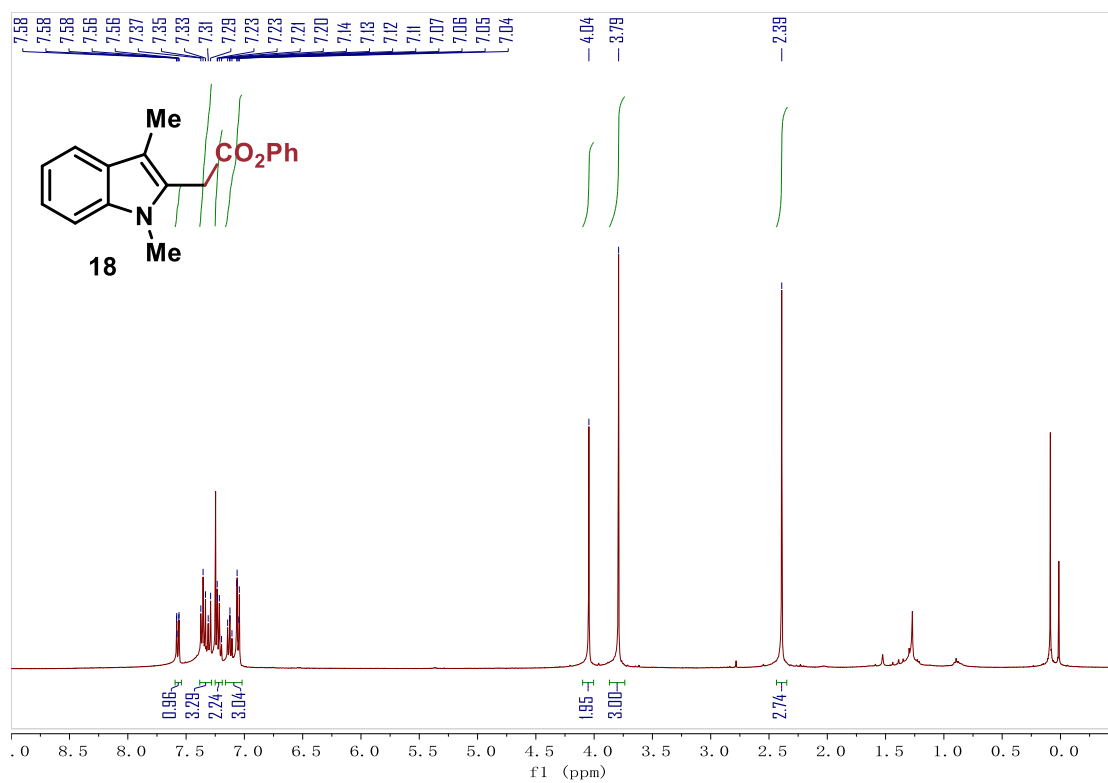

### <sup>13</sup>C NMR of compound 18 (101 MHz in CDCl<sub>3</sub>)

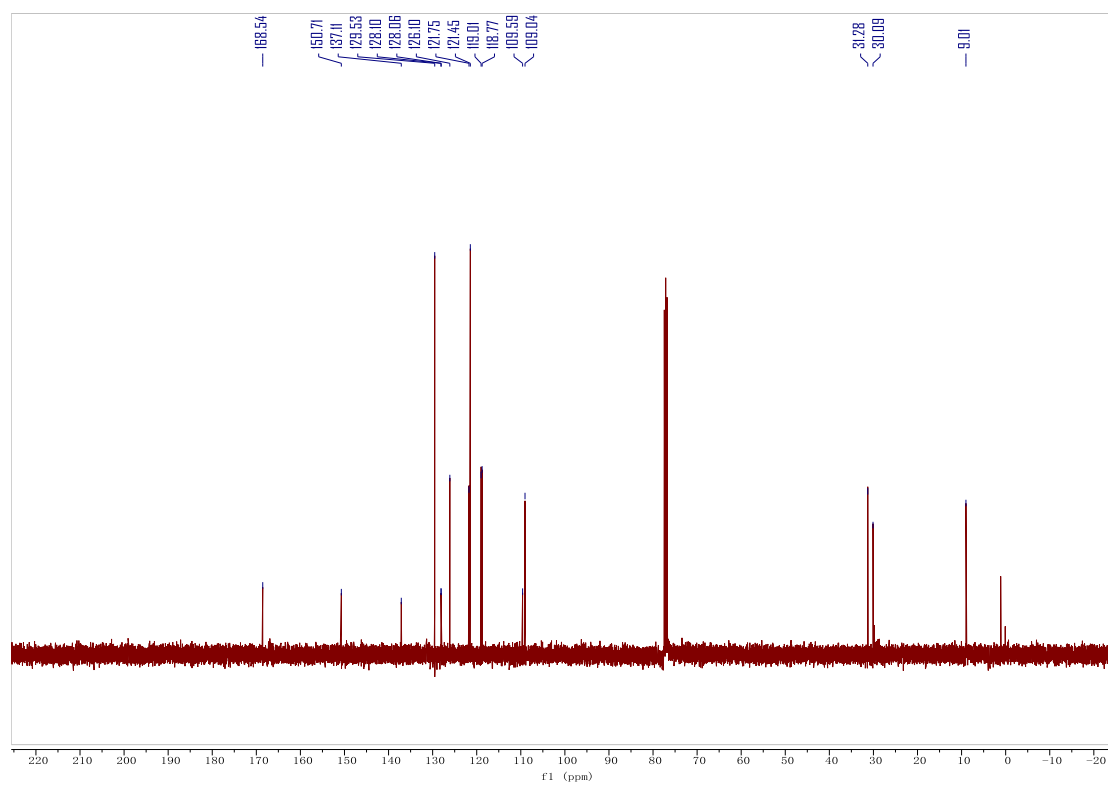

**<sup>1</sup>H NMR of compound 19 (400 MHz in CDCl<sub>3</sub>)**

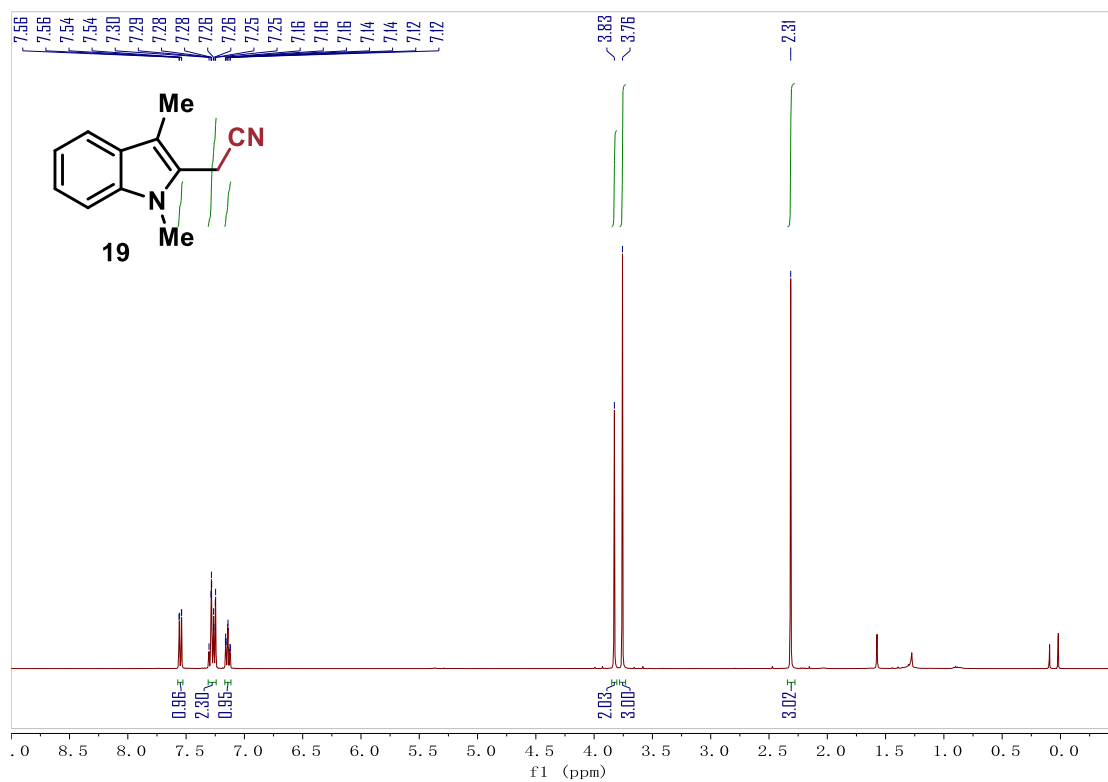

**<sup>13</sup>C NMR of compound 19 (101 MHz in CDCl<sub>3</sub>)**

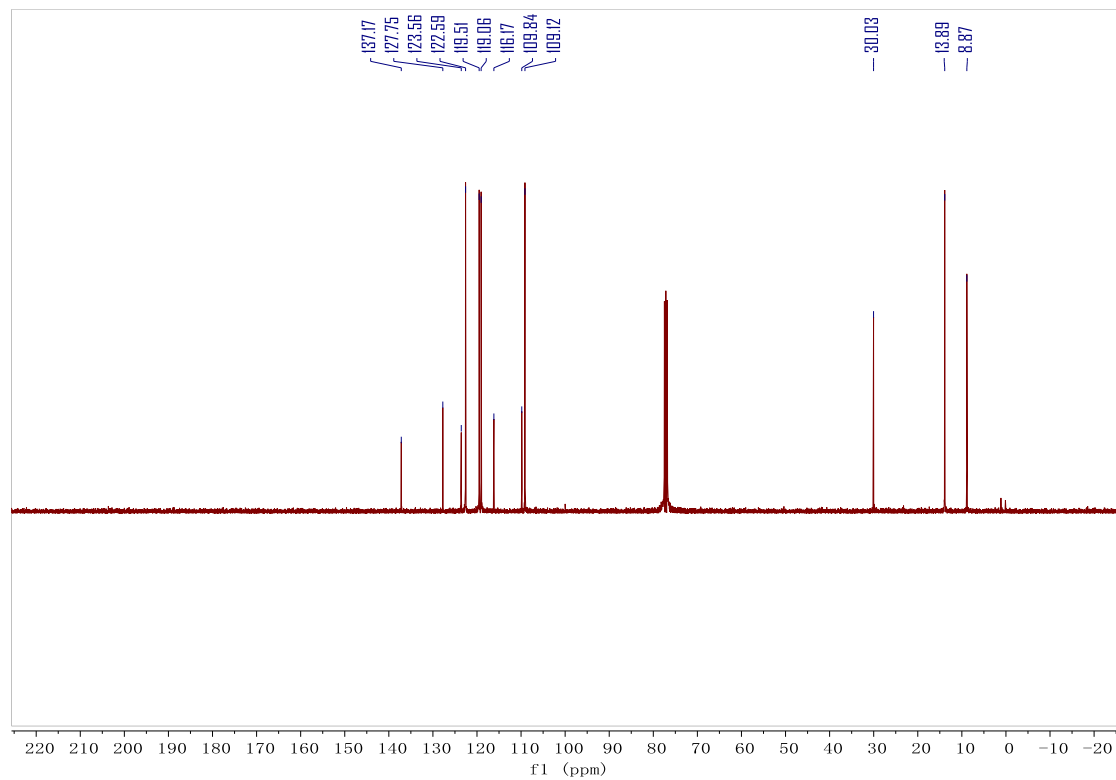

**<sup>1</sup>H NMR of compound 20 (400 MHz in CDCl<sub>3</sub>)**

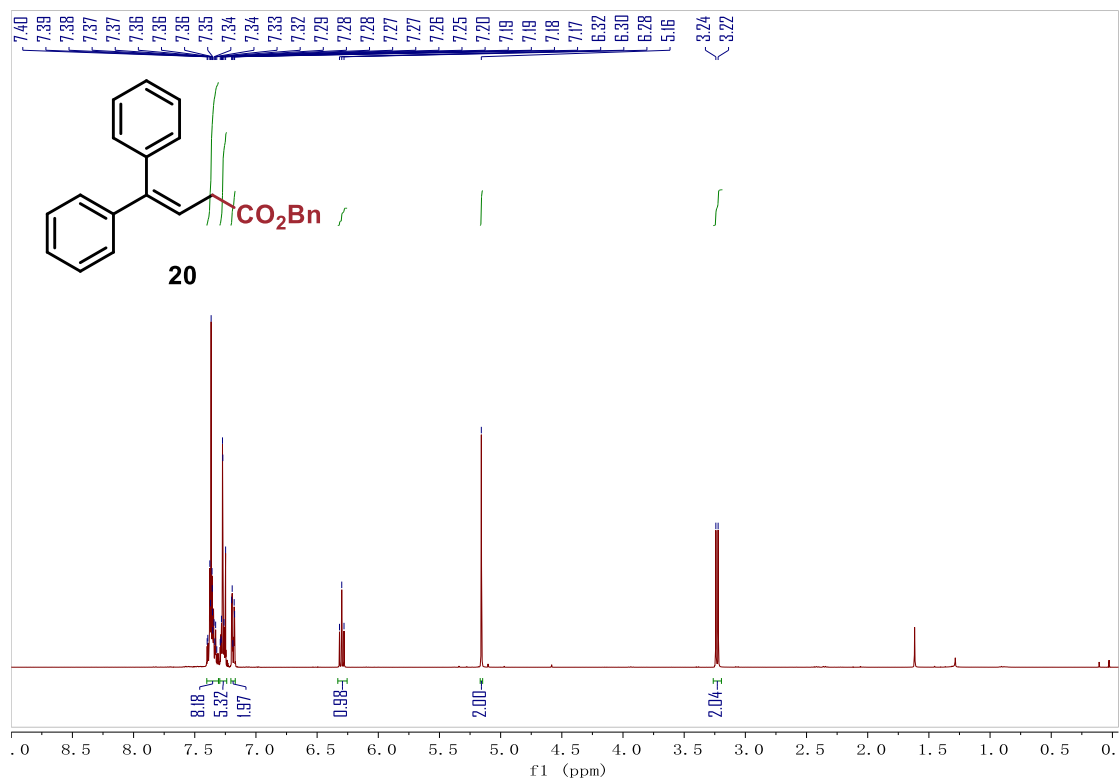

**<sup>13</sup>C NMR of compound 20 (101 MHz in CDCl<sub>3</sub>)**

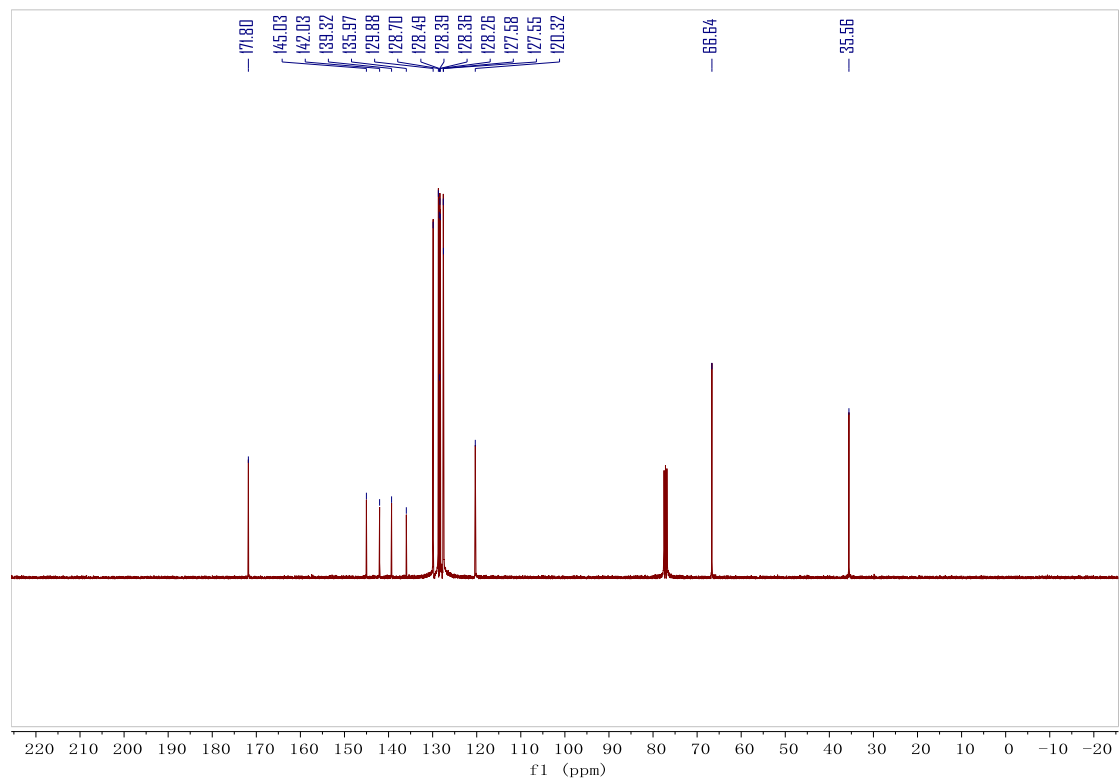

**<sup>1</sup>H NMR of compound 21 (400 MHz in CDCl<sub>3</sub>)**

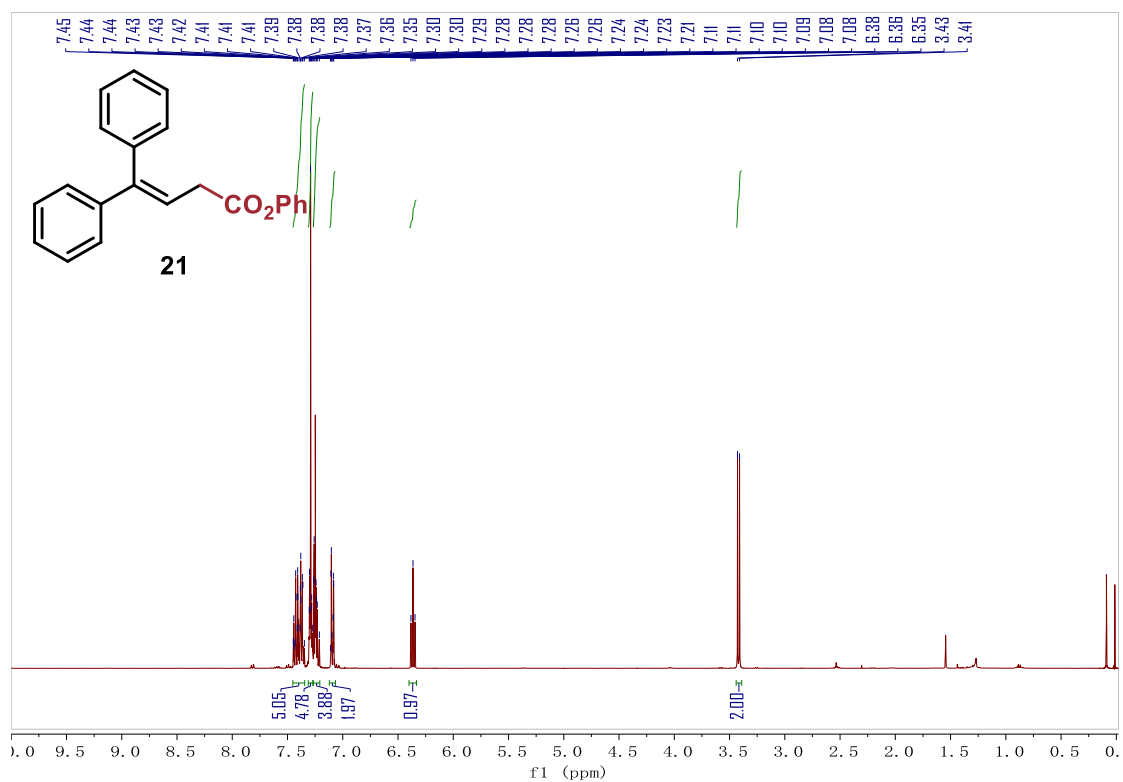

**<sup>13</sup>C NMR of compound 21 (101 MHz in CDCl<sub>3</sub>)**

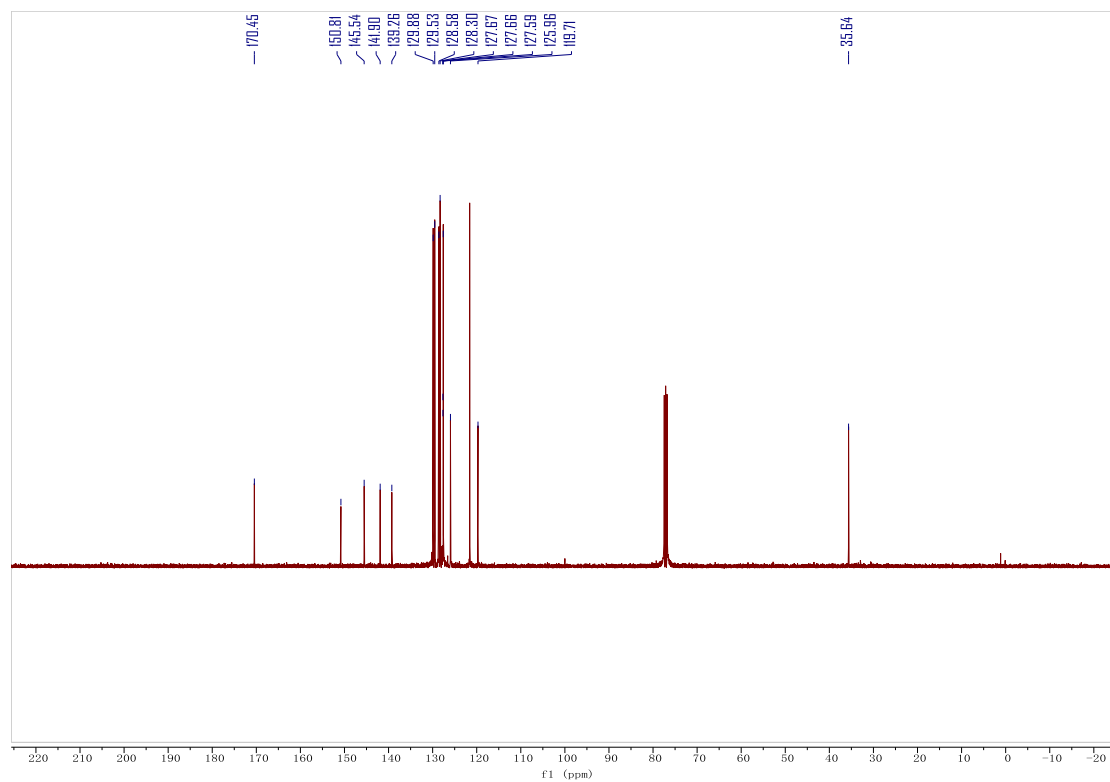



**<sup>1</sup>H NMR of compound 22 (400 MHz in CDCl<sub>3</sub>)**

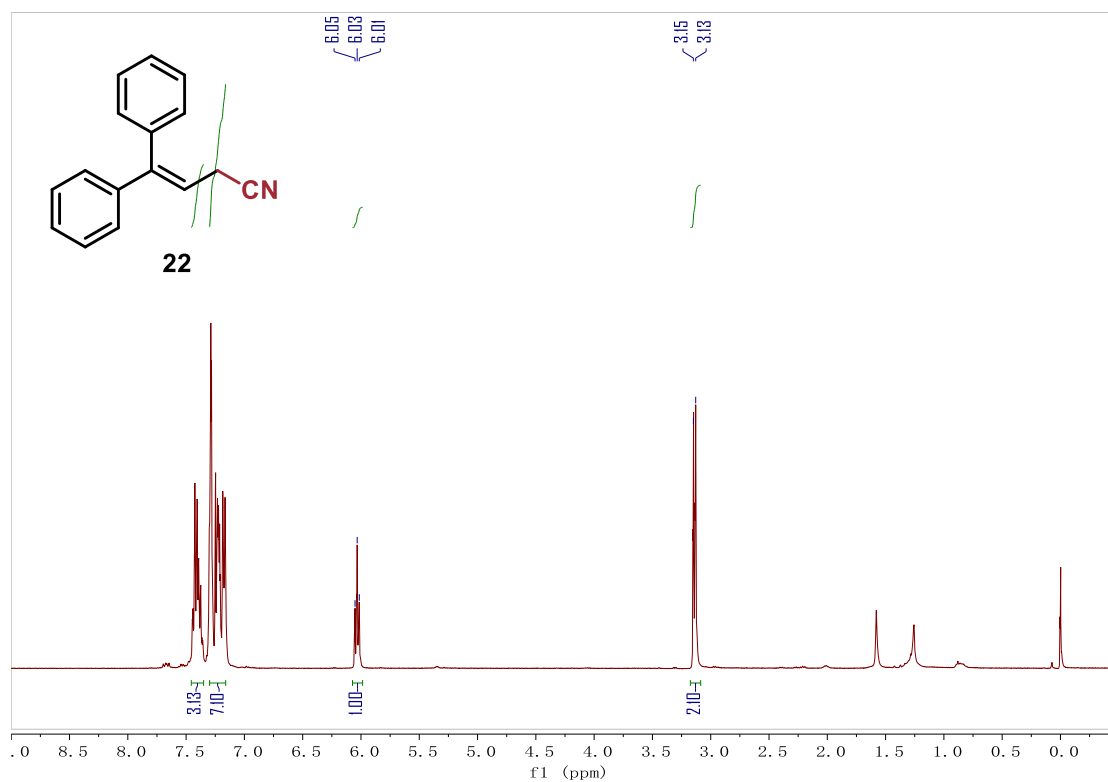

**<sup>13</sup>C NMR of compound 22 (101 MHz in CDCl<sub>3</sub>)**

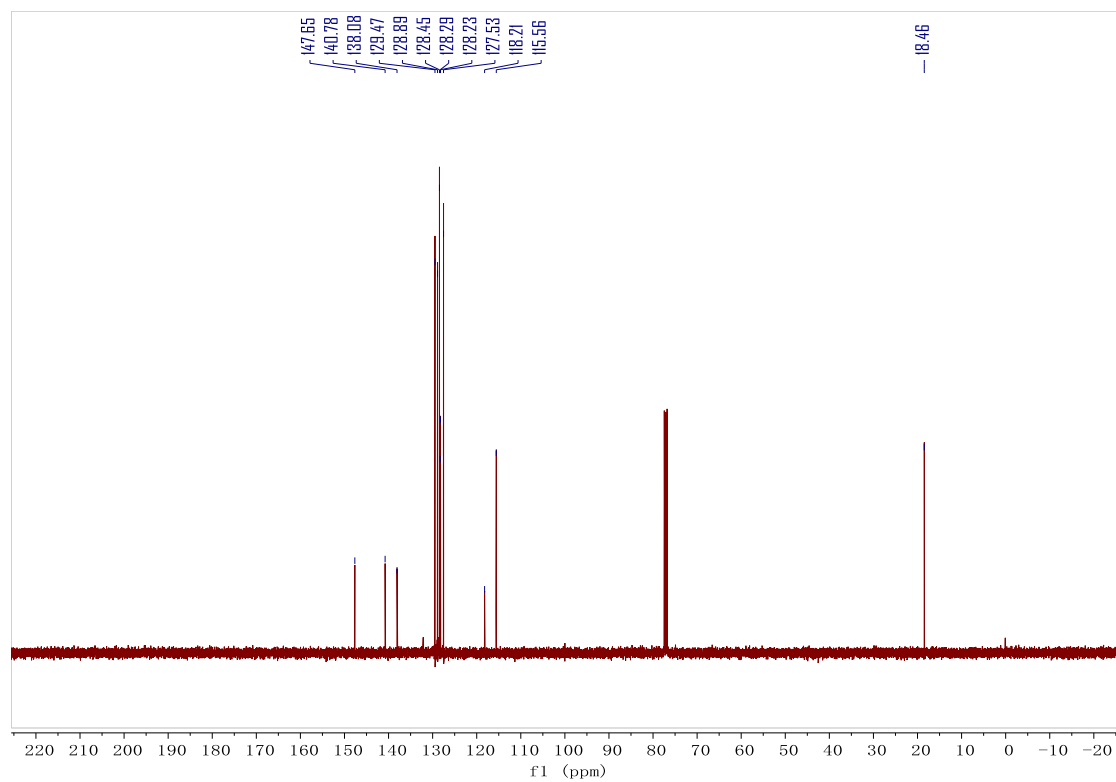

**<sup>1</sup>H NMR of compound 23 (400 MHz in CDCl<sub>3</sub>)**

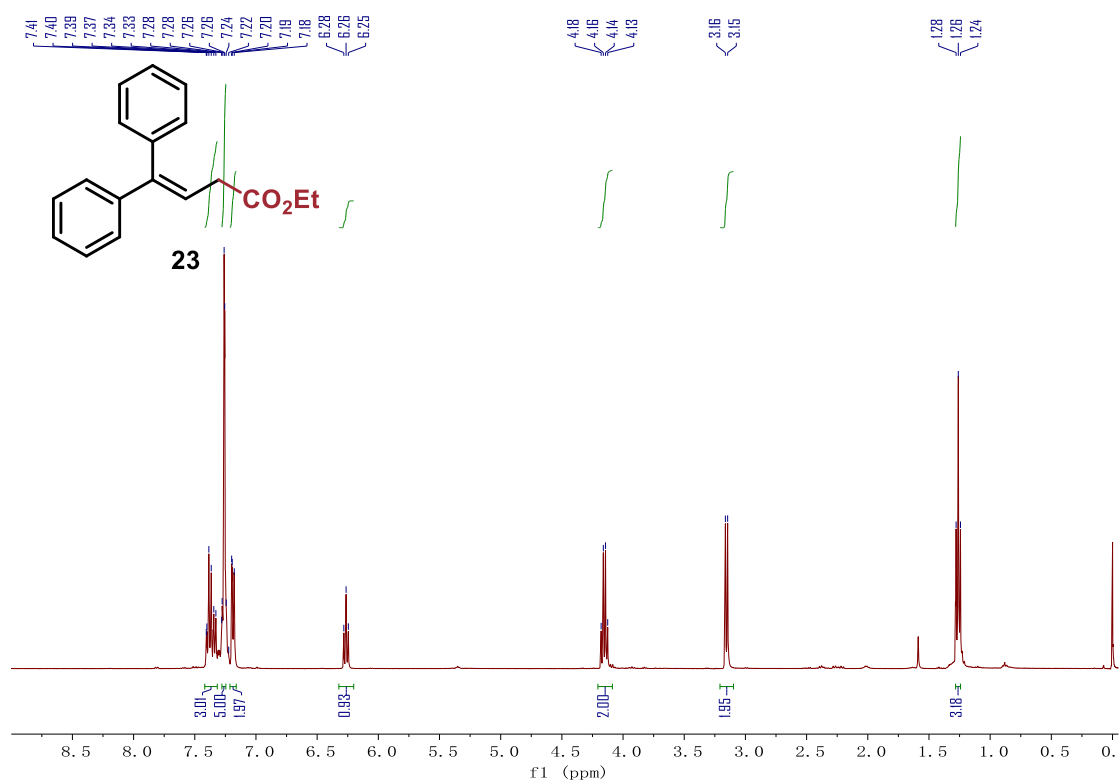

**<sup>13</sup>C NMR of compound 23 (101 MHz in CDCl<sub>3</sub>)**

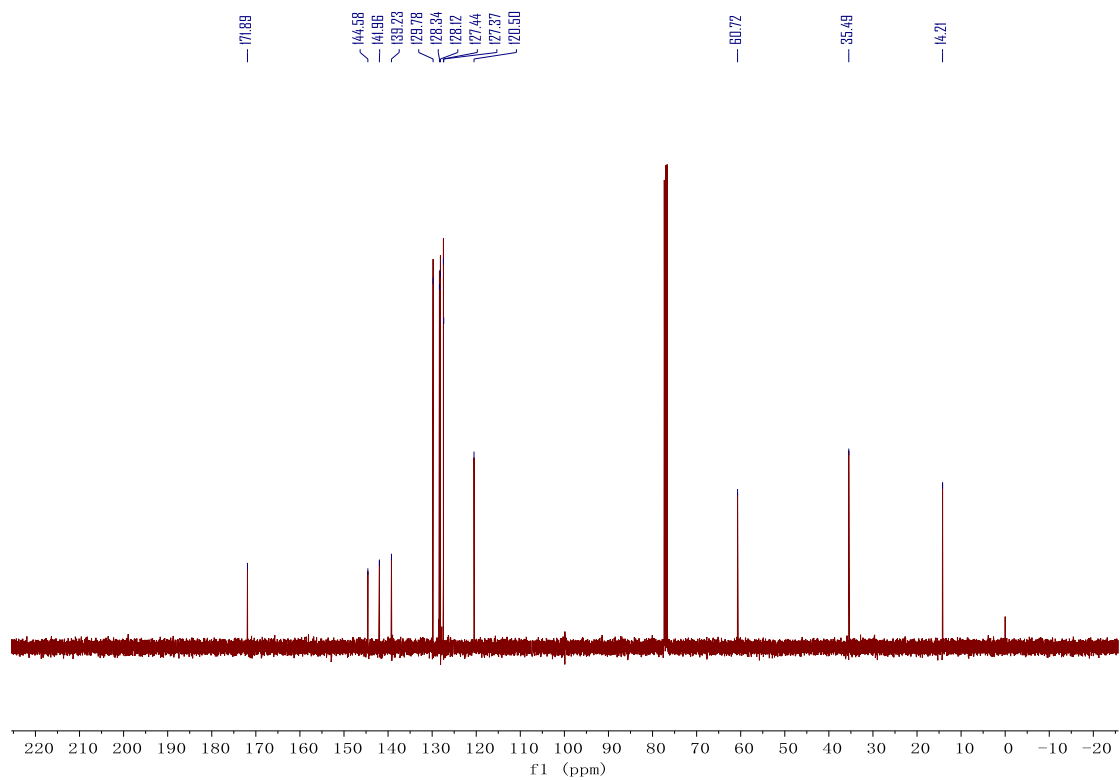

**<sup>1</sup>H NMR of compound 24 (400 MHz in CDCl<sub>3</sub>)**

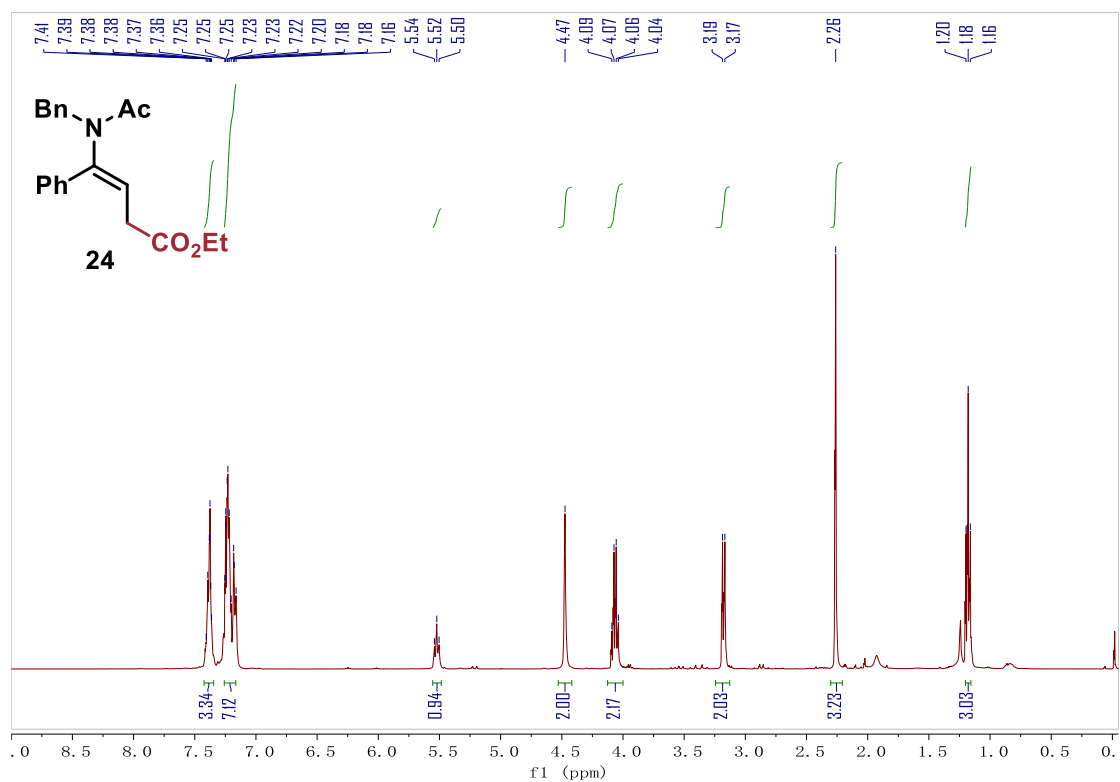

**<sup>13</sup>C NMR of compound 24 (101 MHz in CDCl<sub>3</sub>)**

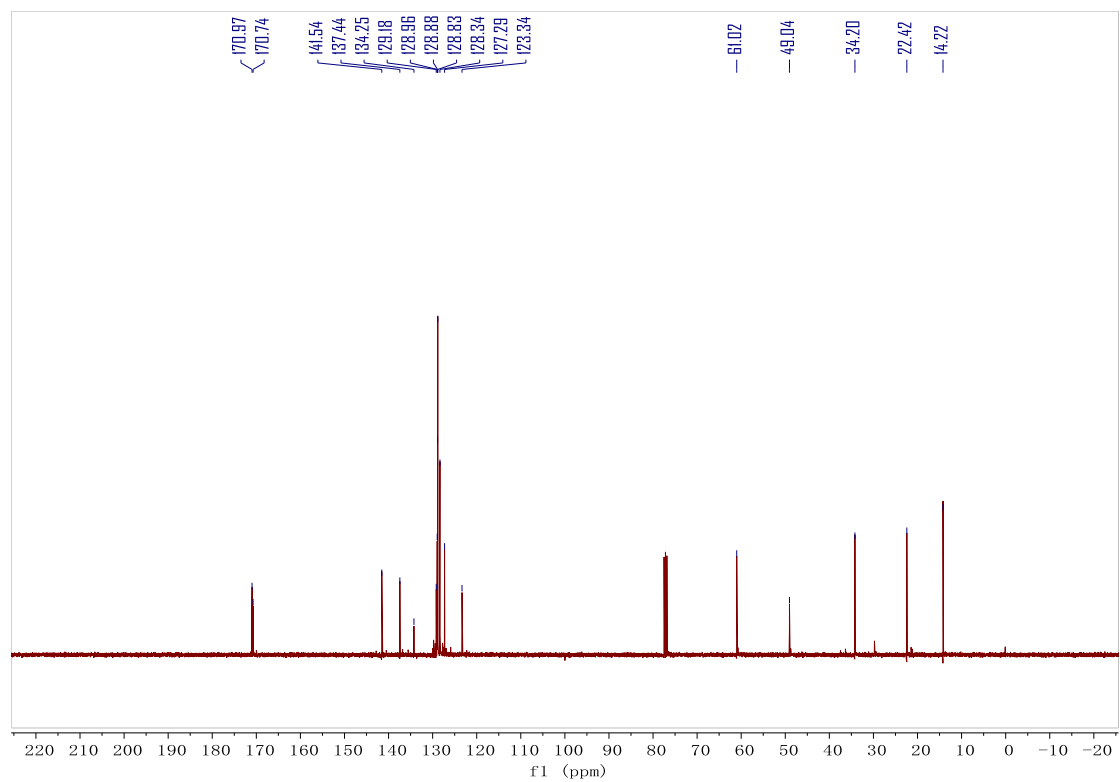

**<sup>1</sup>H NMR of compound 25 (400 MHz in CDCl<sub>3</sub>)**

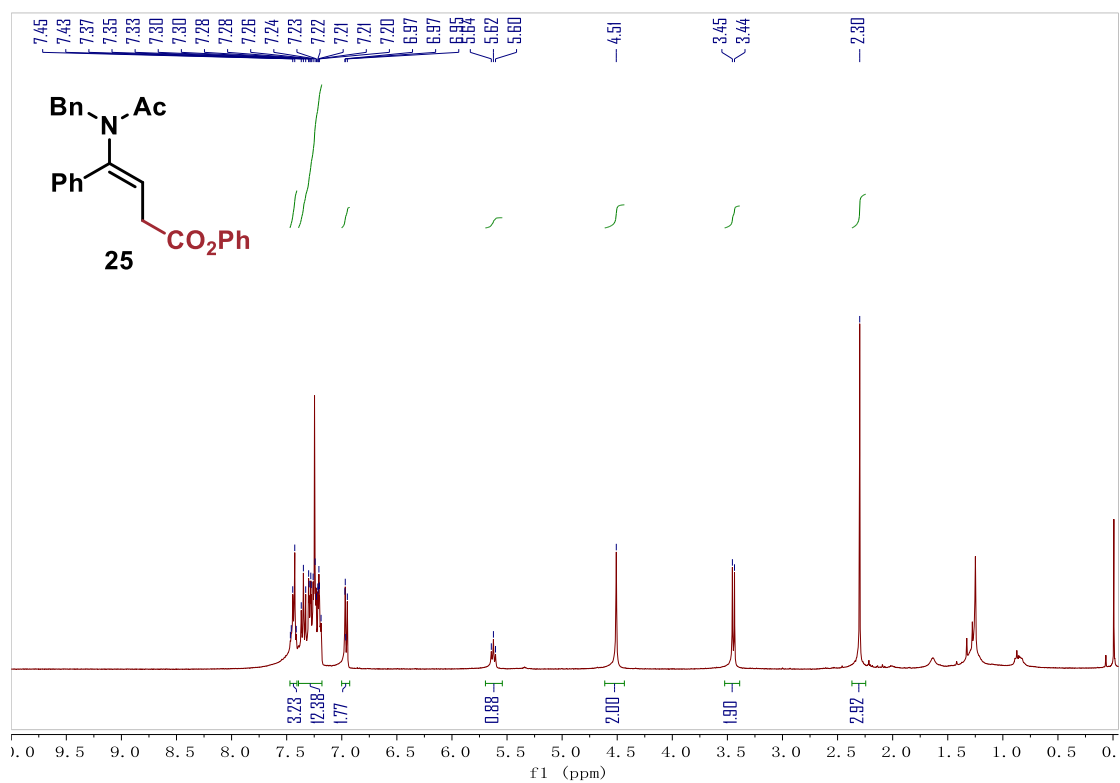

**<sup>13</sup>C NMR of compound 25 (101 MHz in CDCl<sub>3</sub>)**

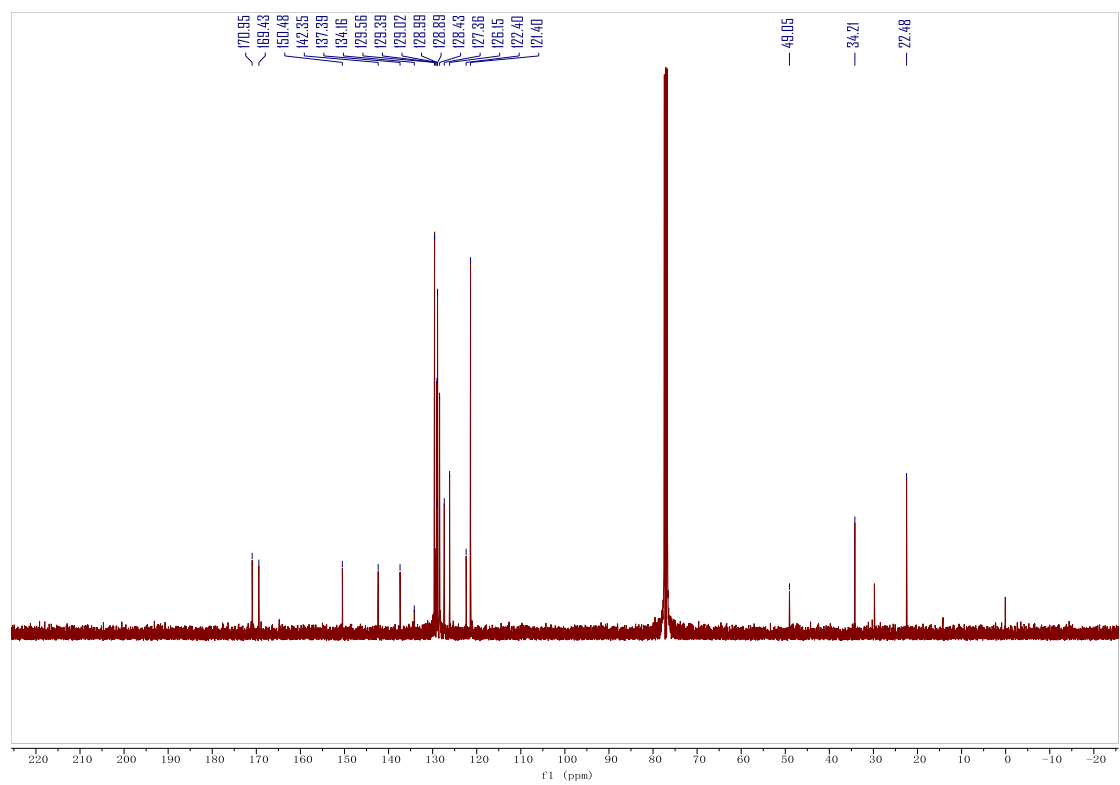

**<sup>1</sup>H NMR of compound 26 (400 MHz in CDCl<sub>3</sub>)**

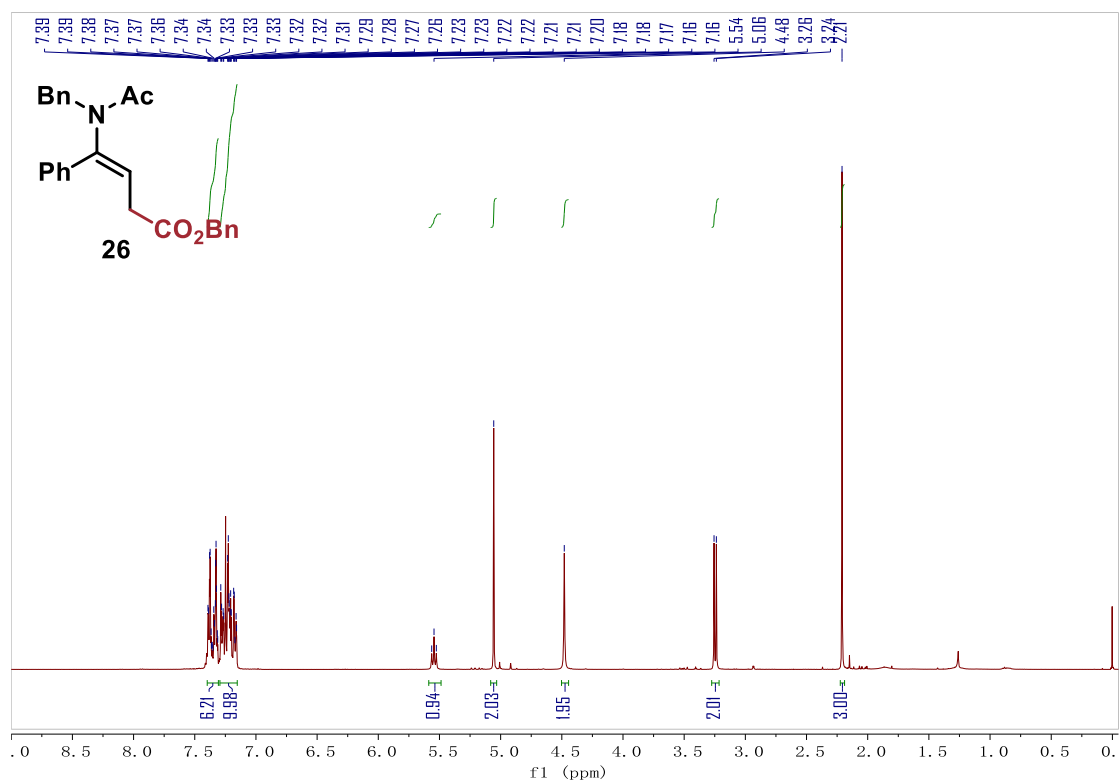

**<sup>13</sup>C NMR of compound 26 (101 MHz in CDCl<sub>3</sub>)**

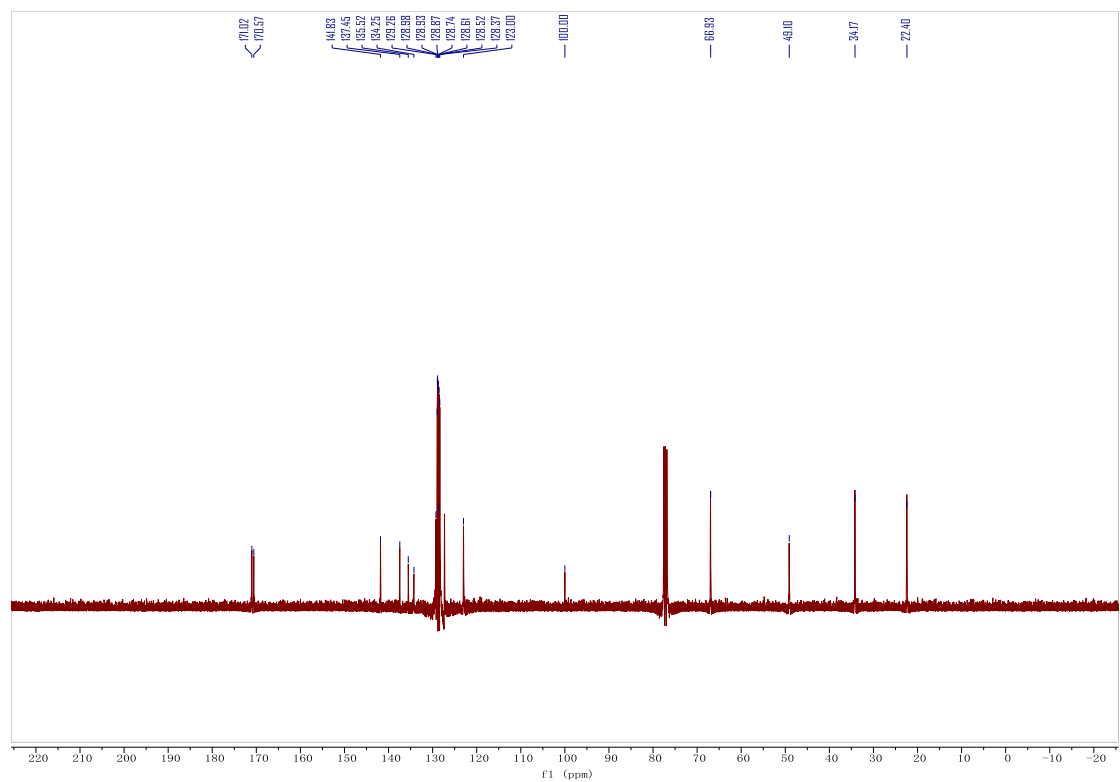

**<sup>1</sup>H NMR of compound 27 (400 MHz in CDCl<sub>3</sub>)**

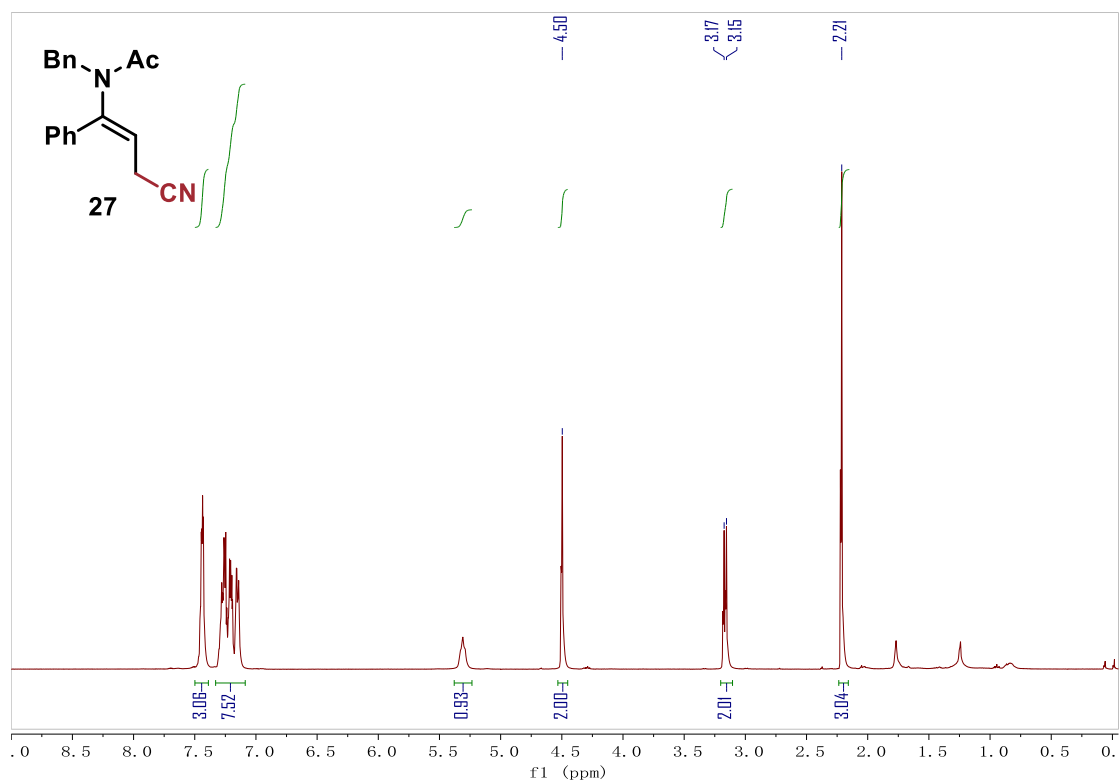

**<sup>13</sup>C NMR of compound 27 (101 MHz in CDCl<sub>3</sub>)**

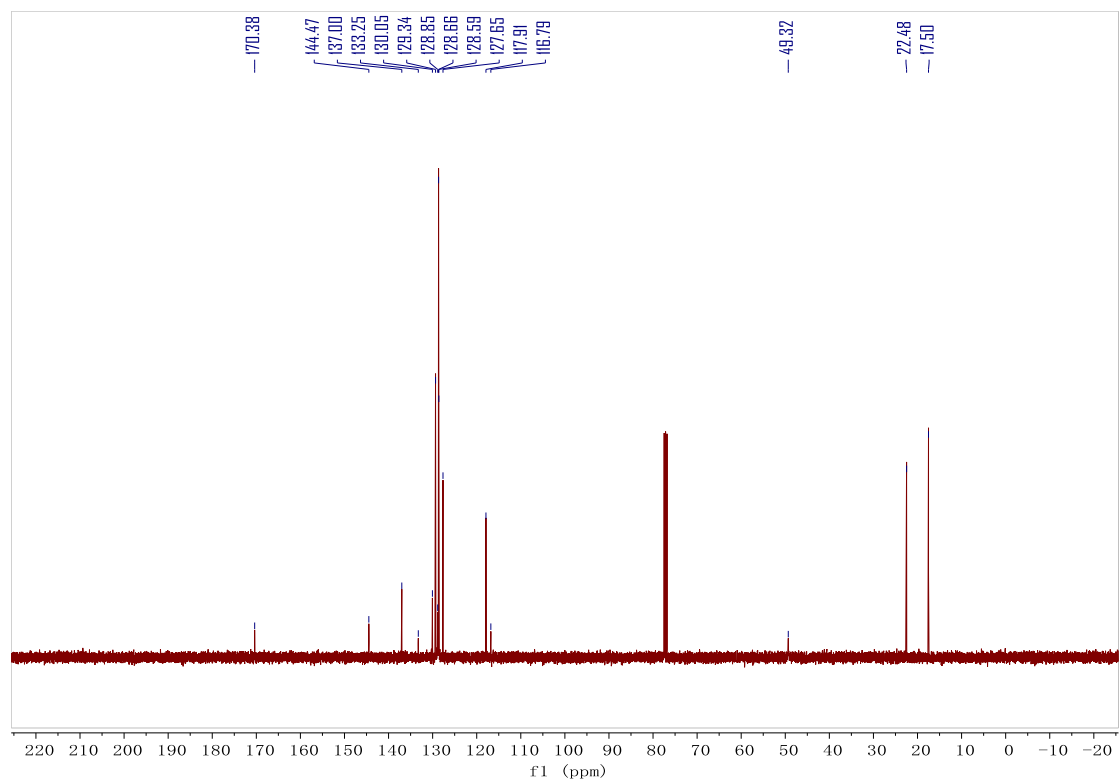

**<sup>1</sup>H NMR of compound 28 (400 MHz in CDCl<sub>3</sub>)**

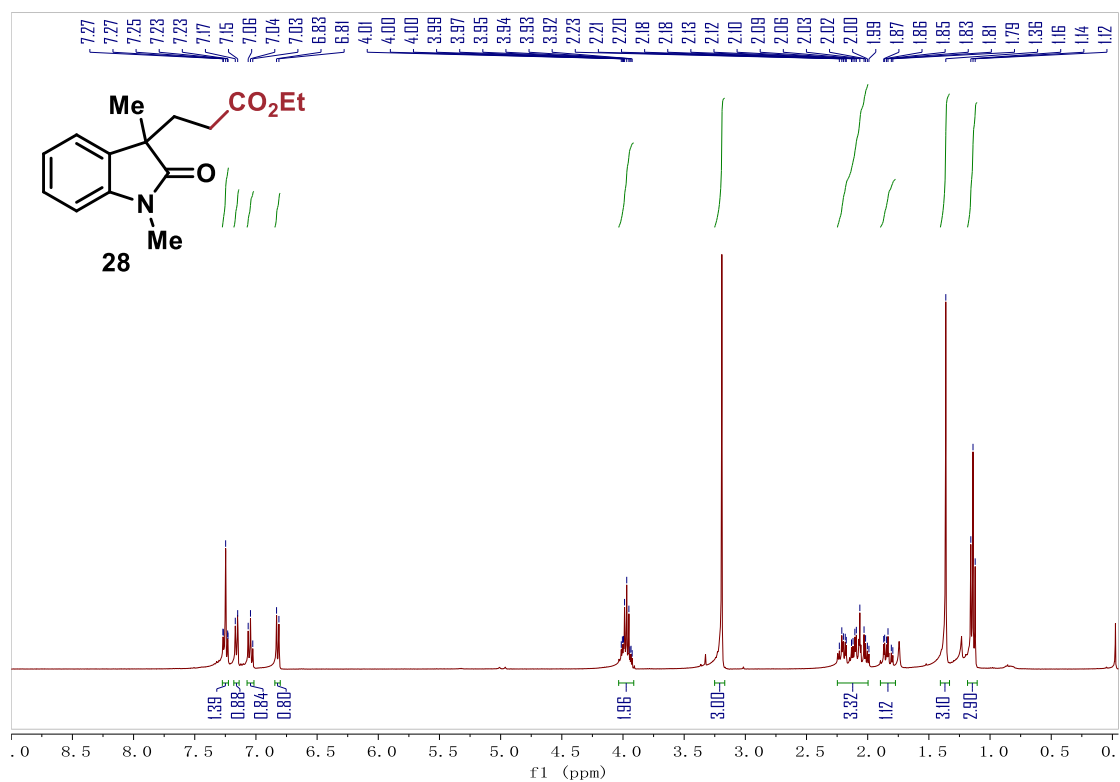

**<sup>13</sup>C NMR of compound 28 (101 MHz in CDCl<sub>3</sub>)**

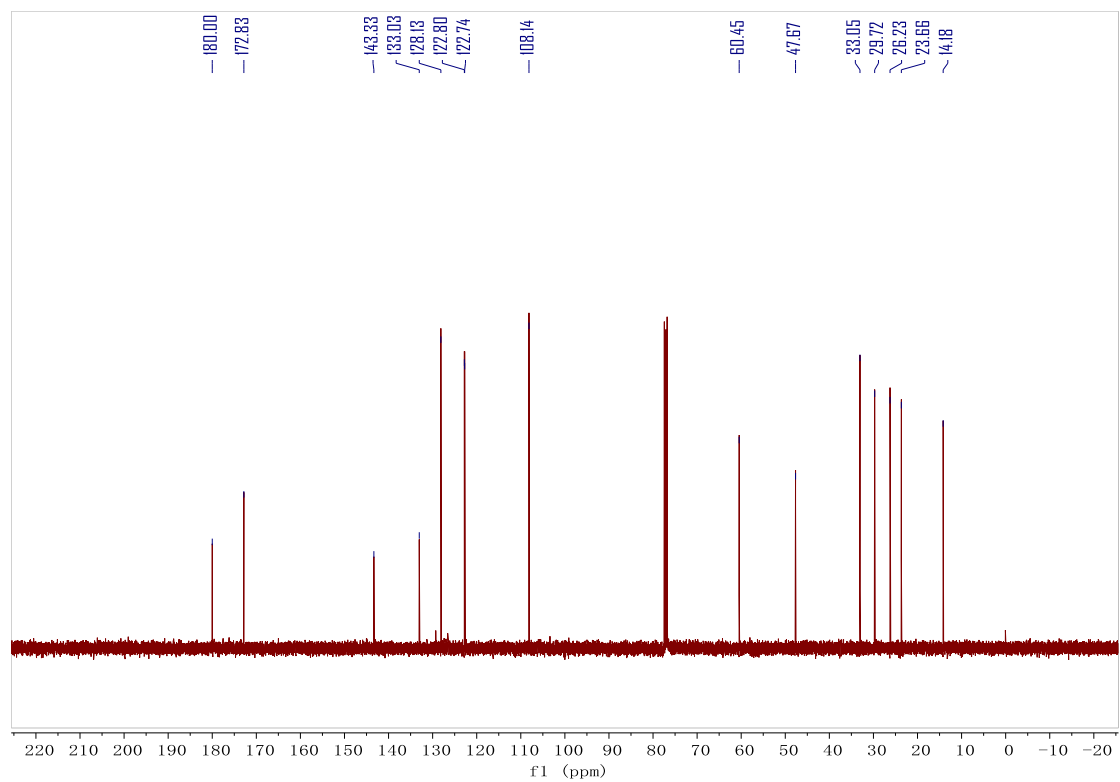

**<sup>1</sup>H NMR of compound 29 (400 MHz in CDCl<sub>3</sub>)**

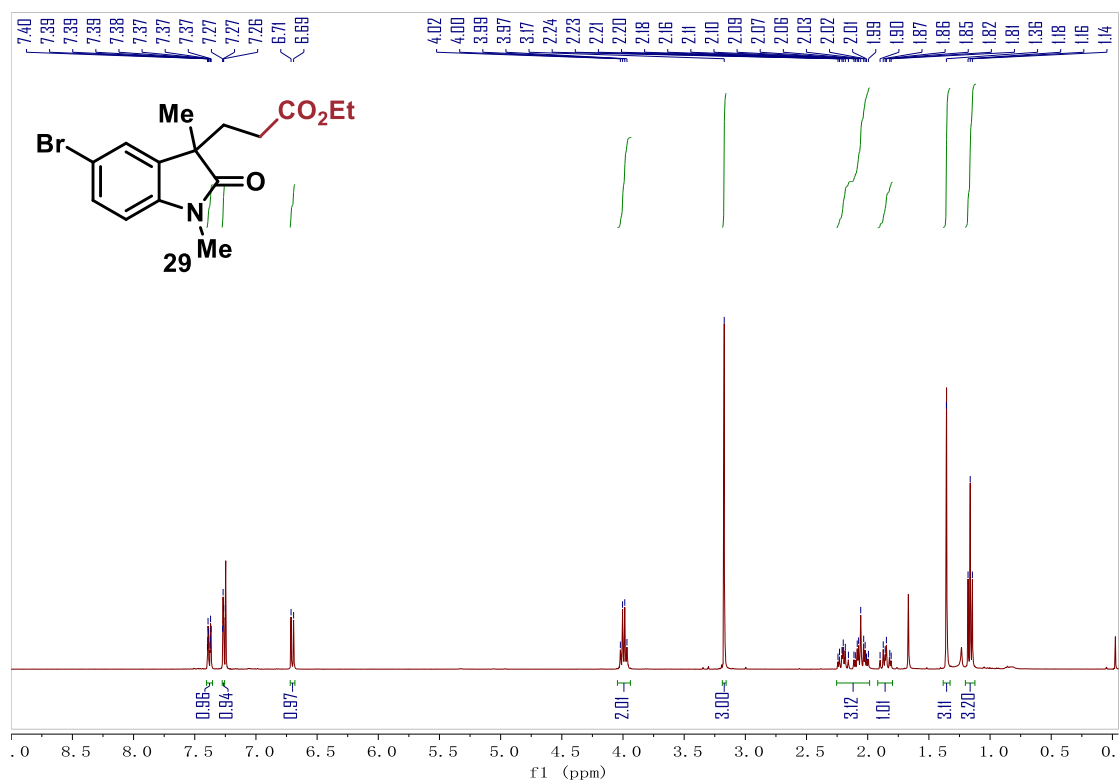

**<sup>13</sup>C NMR of compound 29 (101 MHz in CDCl<sub>3</sub>)**

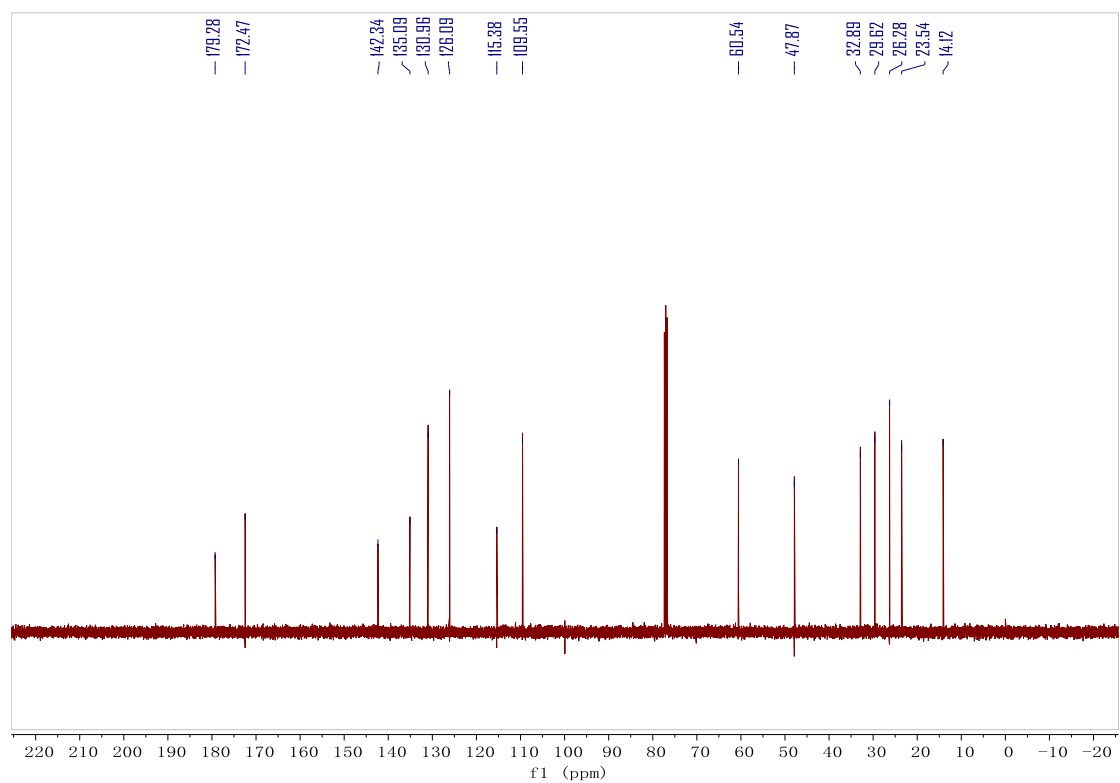



**<sup>1</sup>H NMR of compound 30 (400 MHz in CDCl<sub>3</sub>)**

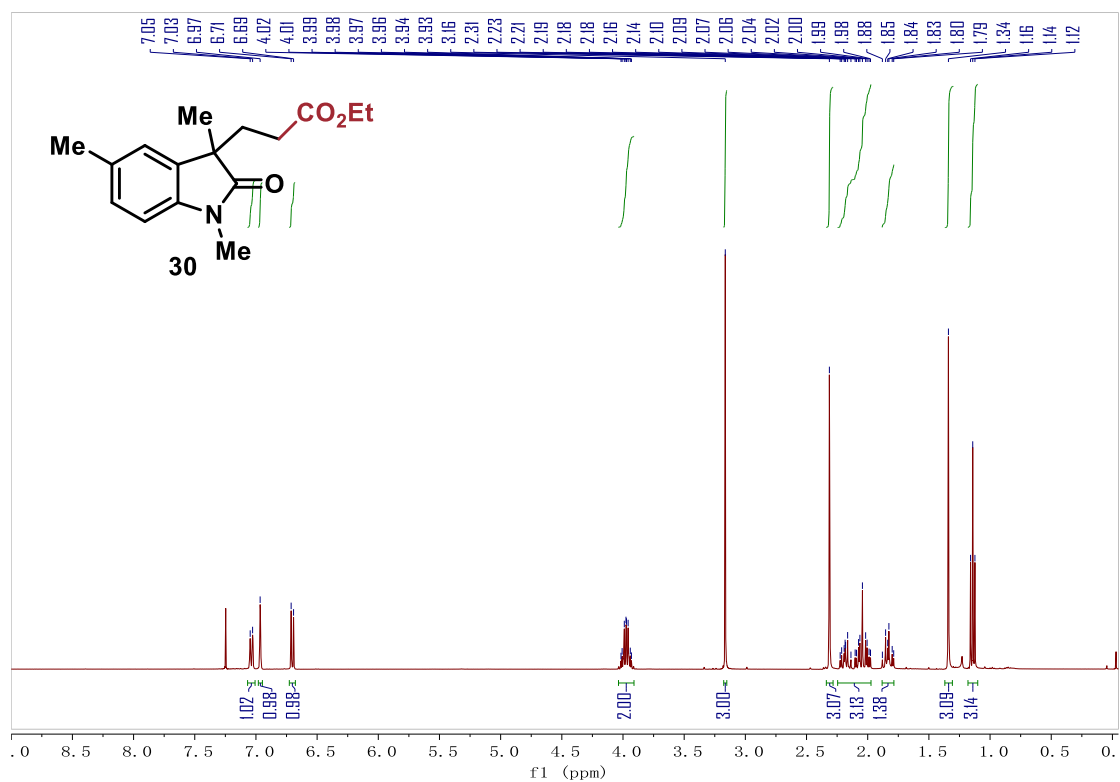

**<sup>13</sup>C NMR of compound 30 (101 MHz in CDCl<sub>3</sub>)**

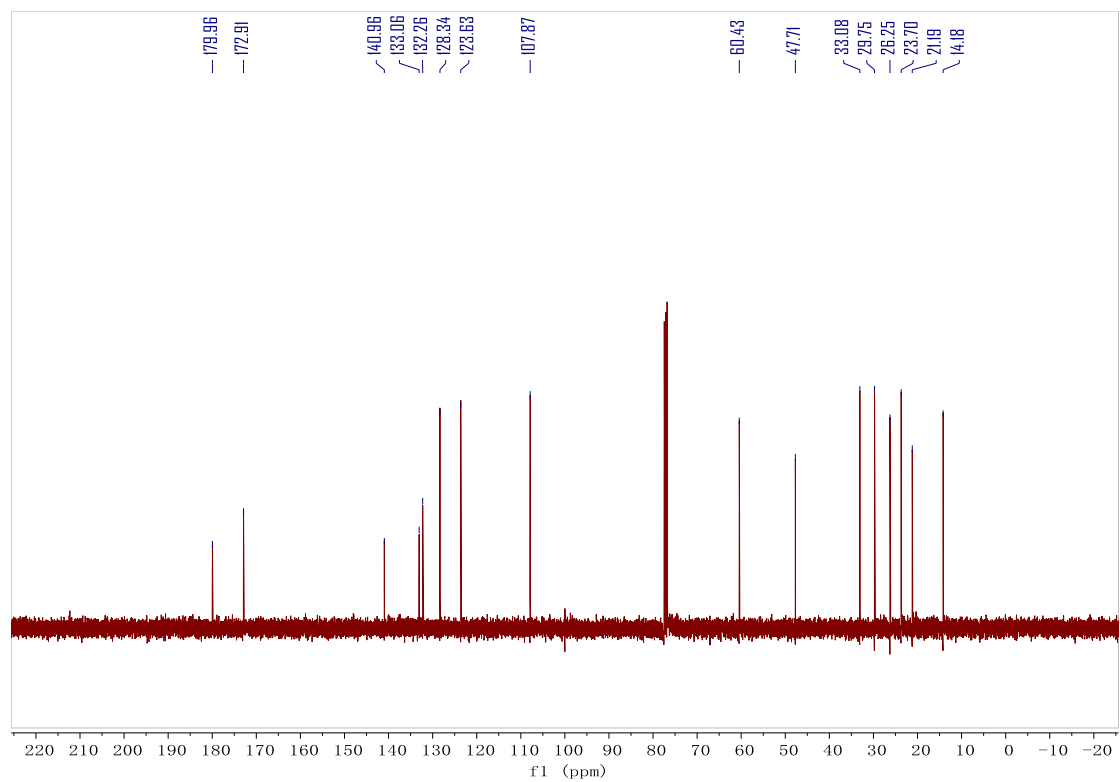

**<sup>1</sup>H NMR of compound 31 (400 MHz in CDCl<sub>3</sub>)**

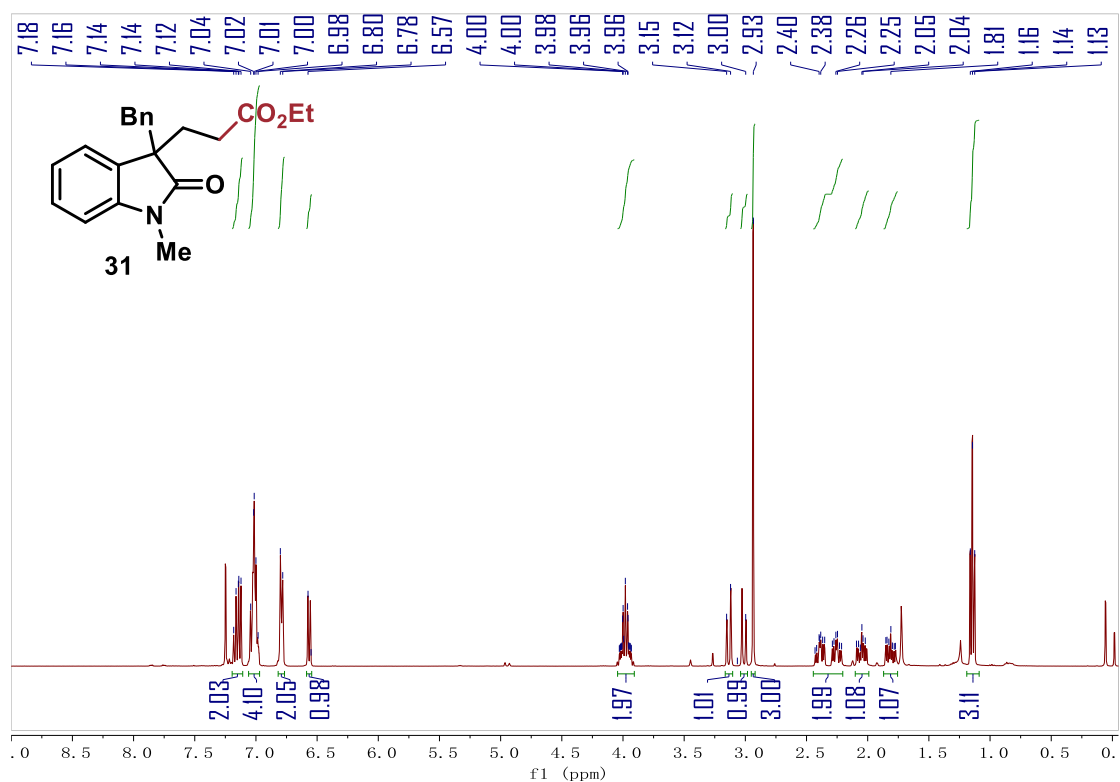

**<sup>13</sup>C NMR of compound 31 (101 MHz in CDCl<sub>3</sub>)**

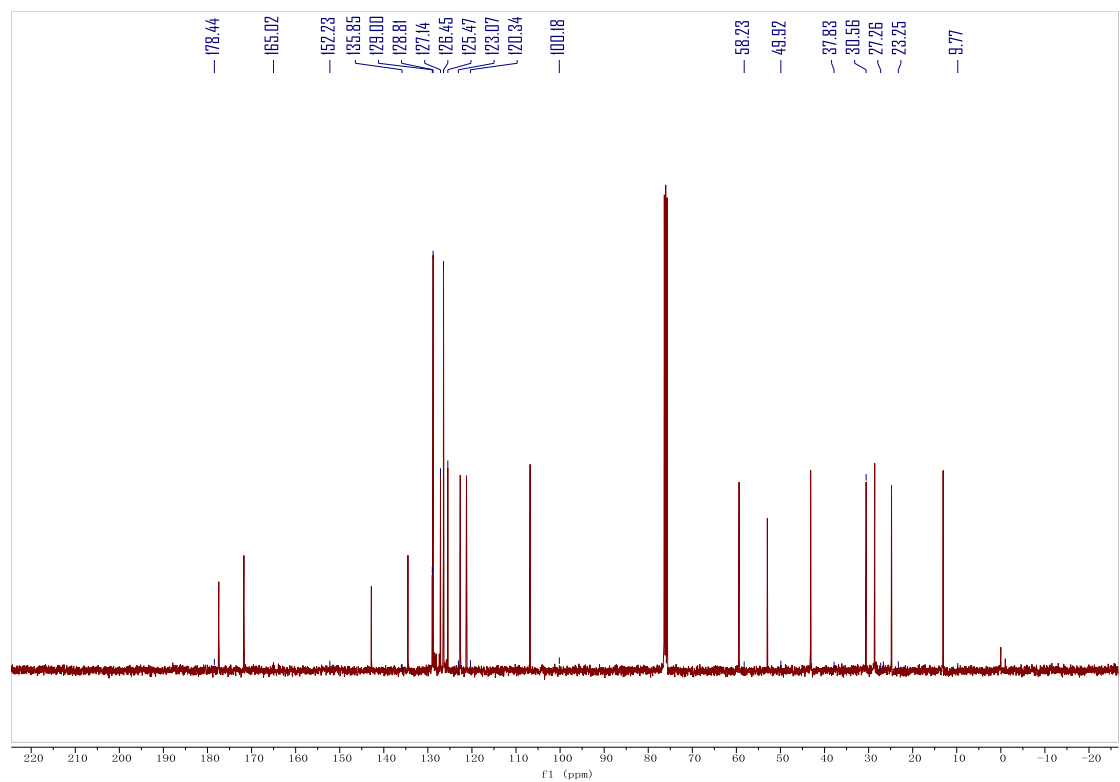

Supplement: d2qo01079h1.pdf [file d2qo01079h1.pdf]
